# Supplementary material for: Quantifying N-heterocyclic carbenes as umpolung catalysts in the benzoin reaction: balance between nucleophilicity and electrophilicity
Source: Royal Society of Chemistry journal article supplement (doi:10.1039/c5nj00413f), 2015-01-01
Supplement: c5nj00413f1.pdf [file c5nj00413f1.pdf]

New Journal of Chemistry

Supplementary material

## Quantifying N-heterocyclic Carbenes as Umpolung Catalysts in the Benzoin Reaction: Balance between Nucleophilicity and Electrophilicity

Maria Schumacher<sup>a</sup> and Bernd Goldfuss<sup>a</sup>

### Table of Contents

|                                                                   |
|-------------------------------------------------------------------|
| Table S1. Cartesien coordinates of benzaldehyde                   |
| Table S2. Cartesien coordinates of benzoin                        |
| Table S3. Cartesien coordinates of <i>t</i> -butanol              |
| Table S4. Cartesien coordinates of imidazole-2-ylidene 1          |
| Table S5. Cartesien coordinates of imidazole-2-ylidene 1, TS-1    |
| Table S6. Cartesien coordinates of imidazole-2-ylidene 1, IM-1    |
| Table S7. Cartesien coordinates of imidazole-2-ylidene 1, TS-2    |
| Table S8. Cartesien coordinates of imidazole-2-ylidene 1, IM-2    |
| Table S9. Cartesien coordinates of imidazole-2-ylidene 1, TS-3    |
| Table S10. Cartesien coordinates of imidazole-2-ylidene 1, IM-3   |
| Table S11. Cartesien coordinates of imidazole-2-ylidene 1, TS-4   |
| Table S12. Cartesien coordinates of phosphazole-2-ylidene 2       |
| Table S13. Cartesien coordinates of phosphazole-2-ylidene 2, TS-1 |
| Table S14. Cartesien coordinates of phosphazole-2-ylidene 2, IM-1 |
| Table S15. Cartesien coordinates of phosphazole-2-ylidene 2, TS-2 |
| Table S16. Cartesien coordinates of phosphazole-2-ylidene 2, IM-2 |
| Table S17. Cartesien coordinates of phosphazole-2-ylidene 2, TS-3 |
| Table S18. Cartesien coordinates of phosphazole-2-ylidene 2, IM-3 |
| Table S19. Cartesien coordinates of phosphazole-2-ylidene 2, TS-4 |
| Table S20. Cartesien coordinates of oxazole-2-ylidene 3           |
| Table S21. Cartesien coordinates of oxazole-2-ylidene 3, TS-1     |
| Table S22. Cartesien coordinates of oxazole-2-ylidene 3, IM-1     |
| Table S23. Cartesien coordinates of oxazole-2-ylidene 3, TS-2     |
| Table S24. Cartesien coordinates of oxazole-2-ylidene 3, IM-2     |
| Table S25. Cartesien coordinates of oxazole-2-ylidene 3, TS-3     |
| Table S26. Cartesien coordinates of oxazole-2-ylidene 3, IM-3     |
| Table S27. Cartesien coordinates of oxazole-2-ylidene 3, TS-4     |
| Table S28. Cartesien coordinates of thiazole-2-ylidene 4          |
| Table S29. Cartesien coordinates of thiazole-2-ylidene 4, TS-1    |
| Table S30. Cartesien coordinates of thiazole-2-ylidene 4, IM-1    |
| Table S31. Cartesien coordinates of thiazole-2-ylidene 4, TS-2    |
| Table S32. Cartesien coordinates of thiazole-2-ylidene 4, IM-2    |
| Table S33. Cartesien coordinates of thiazole-2-ylidene 4, TS-3    |
| Table S34. Cartesien coordinates of thiazole-2-ylidene 4, IM-3    |
| Table S35. Cartesien coordinates of thiazole-2-ylidene 4, TS-4    |
| Table S36. Cartesien coordinates of imidazoline-2-ylidene 5       |
| Table S37. Cartesien coordinates of imidazoline-2-ylidene 5, TS-1 |
| Table S38. Cartesien coordinates of imidazoline-2-ylidene 5, IM-1 |
| Table S39. Cartesien coordinates of imidazoline-2-ylidene 5, TS-2 |
| Table S40. Cartesien coordinates of imidazoline-2-ylidene 5, IM-2 |
| Table S41. Cartesien coordinates of imidazoline-2-ylidene 5, TS-3 |
| Table S42. Cartesien coordinates of imidazoline-2-ylidene 5, IM-3 |
| Table S43. Cartesien coordinates of imidazoline-2-ylidene 5, TS-4 |

Table S44. Cartesien coordinates of 1,2,4-triazole-5-ylidene 6  
Table S45. Cartesien coordinates of 1,2,4-triazole-5-ylidene 6, TS-1  
Table S46. Cartesien coordinates of 1,2,4-triazole-5-ylidene 6, IM-1  
Table S47. Cartesien coordinates of 1,2,4-triazole-5-ylidene 6, TS-2  
Table S48. Cartesien coordinates of 1,2,4-triazole-5-ylidene 6, IM-2  
Table S49. Cartesien coordinates of 1,2,4-triazole-5-ylidene 6, TS-3  
Table S50. Cartesien coordinates of 1,2,4-triazole-5-ylidene 6, IM-3  
Table S51. Cartesien coordinates of 1,2,4-triazole-5-ylidene 6, TS-4  
Table S52. Cartesien coordinates of tetrazole-5-ylidene 7  
Table S53. Cartesien coordinates of tetrazole-5-ylidene 7, TS-1  
Table S54. Cartesien coordinates of tetrazole-5-ylidene 7, IM-1  
Table S55. Cartesien coordinates of tetrazole-5-ylidene 7, TS-2  
Table S56. Cartesien coordinates of tetrazole-5-ylidene 7, IM-2  
Table S57. Cartesien coordinates of tetrazole-5-ylidene 7, TS-3  
Table S58. Cartesien coordinates of tetrazole-5-ylidene 7, IM-3  
Table S59. Cartesien coordinates of tetrazole-5-ylidene 7, TS-4  
Table S60. Cartesien coordinates of perhydrobenzimidazole-2-ylidene 8  
Table S61. Cartesien coordinates of perhydrobenzimidazole-2-ylidene 8, TS-1  
Table S62. Cartesien coordinates of perhydrobenzimidazole-2-ylidene 8, IM-1  
Table S63. Cartesien coordinates of perhydrobenzimidazole-2-ylidene 8, TS-2  
Table S64. Cartesien coordinates of perhydrobenzimidazole-2-ylidene 8, IM-2  
Table S65. Cartesien coordinates of perhydrobenzimidazole-2-ylidene 8, TS-3  
Table S66. Cartesien coordinates of perhydrobenzimidazole-2-ylidene 8, IM-3  
Table S67. Cartesien coordinates of perhydrobenzimidazole-2-ylidene 8, TS-4  
Table S68. Cartesien coordinates of 4,5-diphenyl-imidazole-2-ylidene 9  
Table S69. Cartesien coordinates of 4,5-diphenyl-imidazole-2-ylidene 9, TS-1  
Table S70. Cartesien coordinates of 4,5-diphenyl-imidazole-2-ylidene 9, IM-1  
Table S71. Cartesien coordinates of 4,5-diphenyl-imidazole-2-ylidene 9, TS-2  
Table S72. Cartesien coordinates of 4,5-diphenyl-imidazole-2-ylidene 9, IM-2  
Table S73. Cartesien coordinates of 4,5-diphenyl-imidazole-2-ylidene 9, TS-3  
Table S74. Cartesien coordinates of 4,5-diphenyl-imidazole-2-ylidene 9, IM-3  
Table S75. Cartesien coordinates of 4,5-diphenyl-imidazole-2-ylidene 9, TS-4  
Table S76. Cartesien coordinates of benzimidazole-2-ylidene 10  
Table S77. Cartesien coordinates of benzimidazole-2-ylidene 10, TS-1  
Table S78. Cartesien coordinates of benzimidazole-2-ylidene 10, IM-1  
Table S79. Cartesien coordinates of benzimidazole-2-ylidene 10, TS-2  
Table S80. Cartesien coordinates of benzimidazole-2-ylidene 10, IM-2  
Table S81. Cartesien coordinates of benzimidazole-2-ylidene 10, TS-3  
Table S82. Cartesien coordinates of benzimidazole-2-ylidene 10, IM-3  
Table S83. Cartesien coordinates of benzimidazole-2-ylidene 10, TS-4  
Table S84. Cartesien coordinates of 1,3-diphenyl-imidazole-2-ylidene 11  
Table S85. Cartesien coordinates of 1,3-diphenyl-imidazole-2-ylidene 11, TS-1  
Table S86. Cartesien coordinates of 1,3-diphenyl-imidazole-2-ylidene 11, IM-1  
Table S87. Cartesien coordinates of 1,3-diphenyl-imidazole-2-ylidene 11, TS-2  
Table S88. Cartesien coordinates of 1,3-diphenyl-imidazole-2-ylidene 11, IM-2  
Table S89. Cartesien coordinates of 1,3-diphenyl-imidazole-2-ylidene 11, TS-3  
Table S90. Cartesien coordinates of 1,3-diphenyl-imidazole-2-ylidene 11, IM-3  
Table S91. Cartesien coordinates of 1,3-diphenyl-imidazole-2-ylidene 11, TS-4  
Table S92. Cartesien coordinates of pyrazoline-3-ylidene 12  
Table S93. Cartesien coordinates of pyrazoline-3-ylidene 12, TS-1  
Table S94. Cartesien coordinates of pyrazoline-3-ylidene 12, IM-1  
Table S95. Cartesien coordinates of pyrazoline-3-ylidene 12, TS-2  
Table S96. Cartesien coordinates of pyrazoline-3-ylidene 12, IM-2  
Table S97. Cartesien coordinates of pyrazoline-3-ylidene 12, TS-3  
Table S98. Cartesien coordinates of pyrazoline-3-ylidene 12, IM-3  
Table S99. Cartesien coordinates of pyrazoline-3-ylidene 12, TS-4  
Table S100. Cartesien coordinates of imidazole-5-ylidene 13  
Table S101. Cartesien coordinates of imidazole-5-ylidene 13, TS-1  
Table S102. Cartesien coordinates of imidazole-5-ylidene 13, IM-1

Table S103. Cartesien coordinates of imidazole-5-ylidene 13, TS-2  
 Table S104. Cartesien coordinates of imidazole-5-ylidene 13, IM-2  
 Table S105. Cartesien coordinates of imidazole-5-ylidene 13, TS-3  
 Table S106. Cartesien coordinates of imidazole-5-ylidene 13, IM-3  
 Table S107. Cartesien coordinates of imidazole-5-ylidene 13, TS-4  
 Table S108. Cartesien coordinates of pyrrolidine-2-ylidene 14  
 Table S109. Cartesien coordinates of pyrrolidine-2-ylidene 14, TS-1  
 Table S110. Cartesien coordinates of pyrrolidine-2-ylidene 14, IM-1  
 Table S111. Cartesien coordinates of pyrrolidine-2-ylidene 14, TS-2  
 Table S112. Cartesien coordinates of pyrrolidine-2-ylidene 14, IM-2  
 Table S113. Cartesien coordinates of pyrrolidine-2-ylidene 4, TS-3  
 Table S114. Cartesien coordinates of pyrrolidine-2-ylidene 14, IM-3  
 Table S115. Cartesien coordinates of pyrrolidine-2-ylidene 14, TS-4  
 Table S116. Cartesien coordinates of 1,2,3-triazole-5-ylidene 15  
 Table S117. Cartesien coordinates of 1,2,3-triazole-5-ylidene 15, TS-1  
 Table S118. Cartesien coordinates of 1,2,3-triazole-5-ylidene 15, IM-1  
 Table S119. Cartesien coordinates of 1,2,3-triazole-5-ylidene 15, TS-2  
 Table S120. Cartesien coordinates of 1,2,3-triazole-5-ylidene 15, IM-2  
 Table S121. Cartesien coordinates of 1,2,3-triazole-5-ylidene 15, TS-3  
 Table S122. Cartesien coordinates of 1,2,3-triazole-5-ylidene 15, IM-3  
 Table S123. Cartesien coordinates of 1,2,3-triazole-5-ylidene 15, TS-4  
 Table S124. Cartesien coordinates of pyridyl-4-ylidene 16  
 Table S125. Cartesien coordinates of pyridyl-4-ylidene 16, IM-1  
 Table S126. Cartesien coordinates of pyridyl-4-ylidene 16, TS-2  
 Table S127. Cartesien coordinates of pyridyl-4-ylidene 16, IM-2  
 Table S128. Cartesien coordinates of pyridyl-4-ylidene 16, TS-3  
 Table S129. Cartesien coordinates of pyridyl-4-ylidene 16, IM-3  
 Table S130. Cartesien coordinates of pyridyl-4-ylidene 16, TS-4  
 Table S131. Cartesien coordinates of pyridyl-3-ylidene 17  
 Table S132. Cartesien coordinates of pyridyl-3-ylidene 17, IM-1  
 Table S133. Cartesien coordinates of pyridyl-3-ylidene 17, TS-2  
 Table S134. Cartesien coordinates of pyridyl-3-ylidene 17, IM-2  
 Table S135. Cartesien coordinates of pyridyl-3-ylidene 17, TS-3  
 Table S136. Cartesien coordinates of pyridyl-3-ylidene 17, IM-3  
 Table S137. Cartesien coordinates of pyridyl-3-ylidene 17, TS-4  
 Table S138. Cartesien coordinates of pyridyl-2-ylidene 18  
 Table S139. Cartesien coordinates of pyridyl-2-ylidene 18, TS-1  
 Table S140. Cartesien coordinates of pyridyl-2-ylidene 18, IM-1  
 Table S141. Cartesien coordinates of pyridyl-2-ylidene 18, TS-2  
 Table S142. Cartesien coordinates of pyridyl-2-ylidene 18, IM-2  
 Table S143. Cartesien coordinates of pyridyl-2-ylidene 18, TS-3  
 Table S144. Cartesien coordinates of pyridyl-2-ylidene 18, IM-3  
 Table S145. Cartesien coordinates of pyridyl-2-ylidene 18, TS-4  
 Table S146. Cartesien coordinates of isoquinoline-6-ylidene 19  
 Table S147. Cartesien coordinates of isoquinoline-6-ylidene 19, TS-1  
 Table S148. Cartesien coordinates of isoquinoline-6-ylidene 19, IM-1  
 Table S149. Cartesien coordinates of isoquinoline-6-ylidene 19, TS-2  
 Table S150. Cartesien coordinates of isoquinoline-6-ylidene 19, IM-2  
 Table S151. Cartesien coordinates of isoquinoline-6-ylidene 19, TS-3  
 Table S152. Cartesien coordinates of isoquinoline-6-ylidene 19, IM-3  
 Table S153. Cartesien coordinates of isoquinoline-6-ylidene 19, TS-4

**Table S1. Cartesien coordinates of benzaldehyde**

|   |             |             |             |
|---|-------------|-------------|-------------|
| C | 1.99222300  | 0.46872900  | 0.00000400  |
| O | 2.84760800  | -0.39586400 | -0.00002300 |
| H | 2.27397300  | 1.54574100  | 0.00009800  |
| C | 0.53396300  | 0.21443500  | -0.00000300 |
| C | -0.36109000 | 1.29210900  | 0.00002700  |
| C | 0.04519700  | -1.10111000 | -0.00001200 |
| C | -1.73590100 | 1.06061500  | -0.00002900 |
| H | 0.02505600  | 2.30952000  | 0.00007500  |

|   |             |             |             |
|---|-------------|-------------|-------------|
| C | -1.32631200 | -1.33122100 | 0.00002800  |
| H | 0.75893200  | -1.91937300 | -0.00000600 |
| C | -2.21683200 | -0.25077500 | -0.00000500 |
| H | -2.43022500 | 1.89617800  | -0.00008200 |
| H | -1.70784300 | -2.34856600 | 0.00006300  |
| H | -3.28823500 | -0.43328000 | -0.00002400 |

**Table S2. Cartesien coordinates of benzoin**

|   |             |             |             |
|---|-------------|-------------|-------------|
| C | -0.60655700 | 1.38147800  | -0.08457600 |
| H | 0.82934400  | 3.05764200  | -0.36455300 |
| C | -1.64249100 | 0.31501000  | -0.04448400 |
| C | -2.76526200 | 0.52006700  | 0.77580300  |
| C | -1.55441500 | -0.86309200 | -0.80264400 |
| C | -3.77622000 | -0.43280200 | 0.83821100  |
| H | -2.82173000 | 1.43675700  | 1.35324000  |
| C | -2.56892200 | -1.81661100 | -0.73877900 |
| H | -0.69245800 | -1.04649700 | -1.43385000 |
| C | -3.67965800 | -1.60361000 | 0.07996100  |
| H | -4.64022400 | -0.26597000 | 1.47537800  |
| H | -2.49159900 | -2.72645000 | -1.32719700 |
| H | -4.46932900 | -2.34873900 | 0.12743600  |
| O | -0.73260600 | 2.41531800  | 0.56499800  |
| C | 0.67888200  | 1.24115400  | -0.93341100 |
| H | 0.40304500  | 0.90726500  | -1.94362100 |
| C | 1.61990200  | 0.20859100  | -0.31609200 |
| C | 2.04633700  | 0.35529200  | 1.01055700  |
| C | 2.10778500  | -0.86244300 | -1.07040600 |
| C | 2.93232700  | -0.56120700 | 1.57342300  |
| H | 1.68534700  | 1.19477000  | 1.59914700  |
| C | 2.99634500  | -1.78225400 | -0.50919900 |
| H | 1.80298800  | -0.97037100 | -2.10959300 |
| C | 3.40791500  | -1.63479500 | 0.81543200  |
| H | 3.25344200  | -0.43815600 | 2.60439400  |
| H | 3.37180000  | -2.60685100 | -1.10945500 |
| H | 4.09976500  | -2.34847300 | 1.25466600  |
| O | 1.29433300  | 2.50548300  | -1.02609300 |

**Table S3. Cartesien coordinates of *t*-butanol**

|   |             |             |             |
|---|-------------|-------------|-------------|
| C | 0.68958500  | 1.26617900  | -0.50971300 |
| C | -0.00543800 | -0.00000700 | 0.01381600  |
| H | 0.20751500  | 2.15979500  | -0.09981500 |
| H | 1.74650400  | 1.28148000  | -0.21155600 |
| H | 0.65407300  | 1.32172600  | -1.60402900 |
| C | 0.69189500  | -1.26483100 | -0.50992100 |
| C | -1.49035800 | -0.00131100 | -0.35747600 |
| H | 0.21157700  | -2.15939500 | -0.10003500 |
| H | 0.65633300  | -1.32035000 | -1.60423500 |
| H | 1.74889300  | -1.27815900 | -0.21193400 |
| H | -1.62221400 | -0.00114300 | -1.44477200 |
| H | -1.98283900 | -0.88834700 | 0.05430800  |
| H | -1.98448000 | 0.88459100  | 0.05478200  |
| O | 0.01331400  | -0.00010200 | 1.45232200  |
| H | 0.94402200  | 0.00044200  | 1.72846400  |

**Table S4. Cartesien coordinates of imidazole-2-ylidene 1**

|          |                    |                   |                    |
|----------|--------------------|-------------------|--------------------|
| C        | 0.00001400         | 0.98828300        | -0.00002300        |
| C        | 0.67827000         | -1.21813700       | 0.00001900         |
| C        | -0.67825500        | -1.21814600       | -0.00001500        |
| H        | 1.38344800         | -2.03679100       | 0.00002500         |
| H        | -1.38342200        | -2.03681400       | -0.00003700        |
| N        | 1.06265700         | 0.11945300        | 0.00001000         |
| C        | 2.44197600         | 0.57374100        | 0.00000400         |
| H        | 2.97288200         | 0.21951800        | 0.89125700         |
| H        | 2.97307600         | 0.21891200        | -0.89089300        |
| H        | 2.42371100         | 1.66393400        | -0.00036800        |
| N        | -1.06265600        | 0.11941000        | -0.00002900        |
| C        | -2.44197700        | 0.57374900        | 0.00002400         |
| H        | -2.97302600        | 0.21888700        | -0.89088000        |
| H        | -2.97280000        | 0.21941400        | 0.89127500         |
| <b>H</b> | <b>-2.42404100</b> | <b>1.66395600</b> | <b>-0.00029900</b> |

**Table S5 Cartesien coordinates of imidazole-2-ylidene 1, TS-1**

|   |             |             |             |
|---|-------------|-------------|-------------|
| C | -1.26477200 | 0.04636000  | 0.12353700  |
| C | -3.31613300 | 0.53851300  | -0.71016600 |
| C | -3.02861600 | -0.74294200 | -1.05184200 |
| H | -4.18548400 | 1.14772800  | -0.90573600 |
| H | -3.60046300 | -1.47395000 | -1.60298500 |
| N | -2.22419900 | 1.00249400  | 0.01582100  |
| C | -2.10810400 | 2.35673300  | 0.54068800  |
| H | -1.79568100 | 3.05416400  | -0.24361500 |
| H | -3.07271800 | 2.67721700  | 0.94339700  |
| H | -1.36835700 | 2.36263100  | 1.34151100  |
| N | -1.77482600 | -1.02392100 | -0.52919100 |
| C | -1.08736300 | -2.31234400 | -0.63677200 |
| H | -0.51993300 | -2.45464200 | 0.28741200  |
| H | -1.83487600 | -3.10034000 | -0.75497700 |
| H | -0.41574500 | -2.31367400 | -1.50023000 |
| C | 0.18934200  | -0.19401400 | 1.41348800  |
| H | -0.07786500 | 0.72484600  | 1.99101800  |
| C | 1.42114700  | 0.06674700  | 0.54593900  |
| C | 2.32533400  | -0.97611100 | 0.33156300  |
| C | 1.70647800  | 1.32998300  | 0.01551100  |
| C | 3.48199900  | -0.76924800 | -0.42323300 |
| H | 2.10748600  | -1.93760100 | 0.78684900  |
| C | 2.86077100  | 1.54341400  | -0.73634000 |

|   |                   |                    |                   |
|---|-------------------|--------------------|-------------------|
| H | 1.01844500        | 2.15561100         | 0.19332400        |
| C | 3.75162800        | 0.48954300         | -0.96287800       |
| H | 4.17908000        | -1.58883100        | -0.58236500       |
| H | 3.07018400        | 2.52998200         | -1.14341900       |
| H | 4.65345800        | 0.65379400         | -1.54739900       |
| O | <b>0.03067100</b> | <b>-1.31834300</b> | <b>1.95422900</b> |

**Table S6 Cartesien coordinates of imidazole-2-ylidene 1, IM-1**

|   |                    |                   |                    |
|---|--------------------|-------------------|--------------------|
| C | -1.22381900        | -0.00223600       | -0.18106900        |
| C | -3.23440300        | -0.33570500       | 0.76553000         |
| C | -2.76899600        | 0.86795300        | 1.18657900         |
| H | -4.15366600        | -0.85712100       | 0.98106300         |
| H | -3.20755300        | 1.60643600        | 1.83929300         |
| N | -2.26794400        | -0.86243100       | -0.08364400        |
| C | -2.36453600        | -2.16379800       | -0.73922400        |
| H | -1.74894600        | -2.90801100       | -0.22578500        |
| H | -3.40837600        | -2.48301800       | -0.71692300        |
| H | -2.03559500        | -2.07958800       | -1.77597500        |
| N | -1.53300300        | 1.05811100        | 0.59810400         |
| C | -0.71757700        | 2.27377700        | 0.66530100         |
| H | -0.31568600        | 2.40649100        | -0.34793900        |
| H | -1.35888000        | 3.10479300        | 0.96615300         |
| C | 0.09385600         | 2.14690600        | 1.38634000         |
| C | -0.05016500        | -0.01084900       | -1.20824400        |
| H | -0.18807700        | -0.98435000       | -1.76024800        |
| C | 1.29127100         | -0.19131900       | -0.43947000        |
| C | 2.33368900         | 0.68208700        | -0.75031700        |
| C | 1.51164600         | -1.20699800       | 0.49789600         |
| C | 3.57879700         | 0.54878100        | -0.13155300        |
| H | 2.12686700         | 1.45138600        | -1.48917900        |
| C | 2.75181800         | -1.34176700       | 1.12395000         |
| H | 0.70896200         | -1.90281700       | 0.74580500         |
| C | 3.79108900         | -0.46135700       | 0.80919100         |
| H | 4.38623900         | 1.23286200        | -0.38367400        |
| H | 2.90975300         | -2.13224100       | 1.85444700         |
| H | 4.75912800         | -0.56575900       | 1.29321300         |
| O | <b>-0.16928500</b> | <b>1.08035700</b> | <b>-1.94490400</b> |

**Table S7 Cartesien coordinates of imidazole-2-ylidene 1, TS-2**

|   |                    |                   |                    |
|---|--------------------|-------------------|--------------------|
| C | 1.28228600         | -1.23427800       | 0.08909800         |
| C | 2.33213300         | -2.99655200       | -0.80916000        |
| C | 2.89947600         | -2.75403200       | 0.40228700         |
| H | 2.54221800         | -3.75213900       | -1.54924500        |
| H | 3.69935300         | -3.25803700       | 0.92183900         |
| N | 1.33057800         | -2.05891800       | -0.98609900        |
| C | 0.38662600         | -2.02575400       | -2.11121400        |
| H | 0.60876300         | -1.17961500       | -2.76666700        |
| H | 0.49709500         | -2.95752800       | -2.66873300        |
| H | -0.62859600        | -1.93167100       | -1.70352600        |
| N | 2.24977700         | -1.65982500       | 0.94142500         |
| C | 2.55468800         | -1.03355200       | 2.22793500         |
| H | 3.52088200         | -1.40853300       | 2.57032100         |
| H | 2.60108000         | 0.04868700        | 2.09776400         |
| H | 1.76731400         | -1.26094700       | 2.94686000         |
| C | 0.30068300         | -0.15460900       | 0.33039600         |
| H | -0.84802200        | -0.52042800       | -0.23047600        |
| C | 0.75085700         | 1.21905600        | -0.04213300        |
| C | 0.27401400         | 2.33048200        | 0.67740600         |
| C | 1.59883600         | 1.46400800        | -1.14021900        |
| C | 0.62251500         | 3.62815900        | 0.30452000         |
| H | -0.36225500        | 2.15483900        | 1.53769900         |
| C | 1.94257200         | 2.76284100        | -1.51084200        |
| C | 2.00368100         | 0.63013700        | -1.71095100        |
| C | 1.45594400         | 3.85708300        | -0.79220600        |
| H | 0.23994200         | 4.46802000        | 0.88009600         |
| H | 2.59905100         | 2.91941800        | -2.36382100        |
| H | 1.72494400         | 4.86957300        | -1.08062900        |
| O | -0.15275200        | -0.26041900       | 1.69025900         |
| H | -1.02820500        | -0.69147200       | 1.56719400         |
| O | -1.94882400        | -1.18629600       | -0.21250700        |
| C | -3.13975500        | -0.51416500       | -0.55252400        |
| C | -3.48475700        | 0.55077800        | 0.51076300         |
| H | -2.69628600        | 1.31089200        | 0.56323900         |
| H | -4.43244100        | 1.06092200        | 0.29375400         |
| H | -3.57185800        | 0.08010000        | 1.49789500         |
| C | -4.26203000        | -1.56915300       | -0.60352500        |
| H | -5.23530300        | -1.12829000       | -0.85665900        |
| H | -4.02278700        | -2.33399500       | -1.35169600        |
| H | -4.34887700        | -2.06764400       | 0.36875700         |
| C | -3.00564600        | 0.16689600        | -1.93191200        |
| H | -2.19754100        | 0.90859600        | -1.91502300        |
| H | -2.76900000        | -0.57906800       | -2.70102100        |
| H | <b>-3.92858100</b> | <b>0.68002600</b> | <b>-2.23222200</b> |

**Table S8 Cartesien coordinates of imidazole-2-ylidene 1, IM-2**

|   |             |             |             |
|---|-------------|-------------|-------------|
| C | 1.23350100  | 0.06700600  | 0.09556000  |
| C | 2.76465000  | -1.61396400 | 0.06013100  |
| C | 3.42622400  | -0.46909100 | -0.17955000 |
| H | 3.12537000  | -2.62737900 | 0.14701000  |
| H | 4.47168400  | -0.29419800 | -0.38313700 |
| N | 1.40422700  | -1.31723500 | 0.23067800  |
| C | 0.50886800  | -2.15736000 | 1.00616900  |
| H | -0.37517000 | -2.45468900 | 0.43381900  |
| H | 1.05171500  | -3.05188400 | 1.32042800  |
| H | 0.16275600  | -1.61186500 | 1.89335900  |
| N | 2.51245800  | 0.59481300  | -0.13637100 |

|   |                   |                   |                   |
|---|-------------------|-------------------|-------------------|
| C | 2.73462900        | 1.80833400        | -0.91439300       |
| H | 3.78778700        | 2.09083400        | -0.82776000       |
| H | 2.49226600        | 1.65287300        | -1.97505700       |
| H | 2.10340400        | 2.60850700        | -0.53032100       |
| C | 0.07272500        | 0.79592900        | 0.26953300        |
| H | 0.67920500        | 2.23397300        | 1.42269800        |
| C | -1.29513000       | 0.35764700        | 0.04229200        |
| C | -2.37204800       | 1.05122300        | 0.64195300        |
| C | -1.62005600       | -0.70647600       | -0.83208700       |
| C | -3.69032400       | 0.67173700        | 0.41388100        |
| H | -2.15289300       | 1.89839900        | 1.28330900        |
| C | -2.94254200       | -1.08806300       | -1.04695100       |
| H | -0.82480100       | -1.20453500       | -1.38044600       |
| C | -3.99064500       | -0.40861800       | -0.42221200       |
| H | -4.49424100       | 1.22408800        | 0.89549100        |
| H | -3.15586000       | -1.90788800       | -1.72941800       |
| H | -5.02192800       | -0.70303600       | -0.59649600       |
| O | <b>0.21935000</b> | <b>2.16924300</b> | <b>0.57004900</b> |

**Table S9 Cartesian coordinates of imidazole-2-ylidene 1, TS-3**

|   |                    |                    |                    |
|---|--------------------|--------------------|--------------------|
| C | -2.00822100        | -0.17182000        | 0.08222600         |
| C | -3.62976500        | -0.35617600        | 1.62950900         |
| C | -4.19078300        | -0.56076000        | 0.41409700         |
| H | -4.05629400        | -0.35883500        | 2.62018500         |
| H | -5.20925900        | -0.77694200        | 0.13347600         |
| N | -2.28273200        | -0.11764800        | 1.41512500         |
| C | -1.34106100        | 0.10001300         | 2.51414900         |
| H | -1.74753600        | 0.86581600         | 3.18074200         |
| H | -1.19650000        | -0.83157400        | 3.06730000         |
| H | -0.38911700        | 0.44456100         | 2.12116700         |
| N | -3.18812400        | -0.44085100        | -0.53264200        |
| C | -3.45240300        | -0.59450800        | -1.97349400        |
| H | -4.53829500        | -0.58300500        | -2.09696000        |
| H | -2.99299900        | 0.21851500         | -2.52818600        |
| H | -3.03666100        | -1.53674900        | -2.32659600        |
| C | -0.66146100        | -0.10894100        | -0.59550500        |
| H | -0.50610100        | -1.57438700        | -1.75976300        |
| C | 0.05321100         | 1.22219800         | -0.45958900        |
| C | 1.21738800         | 1.41678100         | -1.22443300        |
| C | -0.40862300        | 2.30426900         | 0.30562400         |
| C | 1.91380400         | 2.61994300         | -1.18142400        |
| H | 1.55885800         | 0.61330300         | -1.86449600        |
| C | 0.28836600         | 3.51585200         | 0.34799800         |
| H | -1.34454600        | 2.23275600         | 0.85310800         |
| C | 1.45956100         | 3.67737800         | -0.38716300        |
| H | 2.81562100         | 2.73592000         | -1.77721200        |
| H | -0.10048200        | 4.33604700         | 0.94689800         |
| H | 2.00388100         | 4.61754600         | -0.35676300        |
| O | -0.79002200        | -0.48417900        | -1.90763600        |
| C | 0.18707800         | -1.61547500        | 0.04767400         |
| H | -0.29403900        | -1.80545900        | 1.02656500         |
| C | 1.67214600         | -1.38524100        | 0.25884000         |
| C | 2.56836300         | -1.73366900        | -0.76075000        |
| C | 2.19354000         | -0.88366000        | 1.45800100         |
| C | 3.94133200         | -1.55600900        | -0.59764200        |
| H | 2.15789900         | -2.16857100        | -1.66643400        |
| C | 3.56733600         | -0.70524900        | 1.62812800         |
| H | 1.52394800         | -0.64738100        | 2.28274900         |
| C | 4.44755400         | -1.03502900        | 0.59623900         |
| H | 4.62151500         | -1.83404900        | -1.39963700        |
| H | 3.95080700         | -0.31679700        | 2.56883700         |
| H | 5.51847000         | -0.90010100        | 0.72628500         |
| O | <b>-0.12839800</b> | <b>-2.48088600</b> | <b>-0.91030600</b> |

**Table S10 Cartesian coordinates of imidazole-2-ylidene 1, IM-3**

|   |             |             |             |
|---|-------------|-------------|-------------|
| C | -2.01344800 | -0.33669100 | -0.03467900 |
| C | -4.08682300 | -0.91841000 | 0.61016600  |
| C | -4.20044300 | 0.13906800  | -0.22902000 |
| H | -4.83439600 | -1.49824500 | 1.12743100  |
| H | -5.06795500 | 0.66728900  | -0.59171200 |
| N | -2.73379900 | -1.20655600 | 0.72355300  |
| C | -2.25305600 | -2.33067800 | 1.53764200  |
| H | -3.12058600 | -2.93698500 | 1.80346600  |
| H | -1.54900800 | -2.91664400 | 0.94357400  |
| H | -1.78122300 | -1.96684400 | 2.45397700  |
| N | -2.92345500 | 0.48488800  | -0.61860300 |
| C | -2.61968400 | 1.51687500  | -1.61608600 |
| H | -3.53704200 | 1.72993000  | -2.16856800 |
| H | -2.25846200 | 2.42336300  | -1.12593400 |
| H | -1.84429900 | 1.10225000  | -2.26541200 |
| C | -0.49292100 | -0.25505600 | -0.45984700 |
| C | -0.30860600 | -2.18659600 | -1.34218500 |
| C | 0.03284900  | 1.12172700  | 0.00139200  |
| C | 0.79161700  | 1.87941800  | -0.89493500 |
| C | -0.19156200 | 1.62219600  | 1.28978400  |
| C | 1.32185800  | 3.11105600  | -0.50985800 |
| H | 0.94652900  | 1.47583800  | -1.89036900 |
| C | 0.33424800  | 2.85627000  | 1.67779200  |
| H | -0.78608900 | 1.04937000  | 2.00085000  |
| C | 1.09502300  | 3.60462600  | 0.77722500  |
| H | 1.91401000  | 3.68843700  | -1.21588800 |
| H | 0.14889800  | 3.23291900  | 2.68097800  |
| H | 1.50576200  | 4.56564800  | 1.07627100  |
| O | -0.49578900 | -0.47443500 | -1.78700200 |
| C | 0.36266500  | -1.41773200 | 0.21822100  |
| H | 0.12012600  | -1.51593900 | 1.28303800  |
| C | 1.86091300  | -1.19541200 | 0.10703400  |
| C | 2.51439600  | -1.31898400 | -1.12720200 |
| C | 2.62012700  | -0.88495800 | 1.24017800  |

|   |                    |                    |                    |
|---|--------------------|--------------------|--------------------|
| C | 3.89194900         | -1.12636500        | -1.22024300        |
| H | 1.93021300         | -1.55290200        | -2.01001400        |
| C | 4.00007100         | -0.69255200        | 1.15044500         |
| C | 2.12689600         | -0.79236400        | 2.20592500         |
| C | 4.64083400         | -0.81314800        | -0.08268700        |
| H | 4.38484500         | -1.22360100        | -2.18469700        |
| H | 4.57270700         | -0.45497100        | 2.04371200         |
| H | 5.71590900         | -0.66916500        | -0.15729300        |
| O | <b>-0.04535300</b> | <b>-2.59264100</b> | <b>-0.46471500</b> |

**Table S11 Cartesien coordinates of imidazole-2-ylidene 1, TS-4**

|   |             |             |             |
|---|-------------|-------------|-------------|
| C | -2.13913500 | -0.42389900 | 0.05078600  |
| C | -4.19999200 | -1.22561600 | 0.56420400  |
| C | -4.36799100 | -0.19724900 | -0.30361600 |
| H | -4.91720800 | -1.87605800 | 1.04078200  |
| H | -5.26112300 | 0.23040200  | -0.73265300 |
| N | -2.83188300 | -1.35211000 | 0.76640300  |
| C | -2.23732600 | -2.38949200 | 1.60974500  |
| H | -3.02335600 | -3.08959000 | 1.90025000  |
| H | -1.46719200 | -2.91053100 | 1.03753600  |
| H | -1.80647100 | -1.94958900 | 2.51397000  |
| N | -3.10056400 | 0.27407700  | -0.60813000 |
| C | -2.84436600 | 1.36789900  | -1.54748200 |
| H | -3.71760500 | 1.47754100  | -2.19459100 |
| H | -2.66991400 | 2.30323400  | -1.00924600 |
| H | -1.96575900 | 1.10921800  | -2.13992400 |
| C | -0.21052500 | -0.14819800 | -0.60150400 |
| H | -0.18688600 | -2.18581200 | -1.39161500 |
| C | 0.07717400  | 1.24192100  | -0.05192300 |
| C | 0.64528300  | 2.18183600  | -0.91868400 |
| C | -0.13633700 | 1.59844100  | 1.28573400  |
| C | 0.98803000  | 3.45534500  | -0.46116300 |
| H | 0.81372500  | 1.89124700  | -1.95072900 |
| C | 0.20498200  | 2.86941300  | 1.74603100  |
| H | -0.59430500 | 0.88410400  | 1.96558400  |
| C | 0.76890900  | 3.80343700  | 0.87238400  |
| H | 1.43005800  | 4.17464100  | -1.14620400 |
| H | 0.02716400  | 3.13404000  | 2.78550800  |
| H | 1.03402900  | 4.79483200  | 1.23079400  |
| O | -0.29343600 | -0.31307600 | -1.85353700 |
| C | 0.51279500  | -1.32120000 | 0.13434000  |
| H | 0.21745600  | -1.35546400 | 1.18759500  |
| C | 2.02605200  | -1.16002700 | 0.06811300  |
| C | 2.70680100  | -1.28678300 | -1.15055300 |
| C | 2.76309800  | -0.88757800 | 1.22496100  |
| C | 4.09181600  | -1.14219300 | -1.20568400 |
| H | 2.14157900  | -1.49113200 | -2.05401000 |
| C | 4.15098200  | -0.74176900 | 1.17327300  |
| C | 2.24671200  | -0.79033200 | 2.17783300  |
| C | 4.81967200  | -0.86944200 | -0.04403300 |
| H | 4.60653700  | -1.24293000 | -2.15811600 |
| H | 4.70751700  | -0.53402200 | 2.08383400  |
| H | 5.90035200  | -0.76040900 | -0.08872100 |
| O | 0.07997300  | -2.51395200 | -0.50088400 |

**Table S12. Cartesien coordinates of phosphazole-2-ylidene 2**

|   |                    |                    |                   |
|---|--------------------|--------------------|-------------------|
| C | 0.29181800         | -1.07424800        | 0.30433700        |
| C | -0.36256900        | 1.46966000         | -0.06280400       |
| C | 0.94291900         | 1.17999200         | -0.19911100       |
| H | -0.76242600        | 2.47315500         | -0.14815100       |
| H | 1.75851000         | 1.85847000         | -0.43277200       |
| C | -2.40396500        | -0.61948300        | -0.67267200       |
| H | -3.30068100        | 0.00453200         | -0.62283600       |
| H | -2.00585600        | -0.60539400        | -1.68992600       |
| H | -2.67996000        | -1.64467300        | -0.40965300       |
| N | 1.25878500         | -0.20287800        | 0.00200300        |
| C | 2.65090400         | -0.63010700        | -0.18444600       |
| H | 3.01339800         | -0.32802800        | -1.17374100       |
| H | 3.29535800         | -0.18331300        | 0.58099100        |
| H | 2.67069300         | -1.71519000        | -0.09420000       |
| P | <b>-1.16767800</b> | <b>-0.02628700</b> | <b>0.59096300</b> |

**Table S13. Cartesien coordinates of phosphazole -2-ylidene 2, TS-1**

|   |             |             |             |
|---|-------------|-------------|-------------|
| C | 0.99777400  | 0.09311000  | 0.03430600  |
| C | 3.37299000  | 0.02053700  | -1.02936300 |
| C | 2.75472200  | 1.21394300  | -1.06318000 |
| H | 4.34710500  | -0.16396900 | -1.46520500 |
| H | 3.11313100  | 2.14410800  | -1.49140300 |
| C | 2.80132500  | -1.86072900 | 1.20435400  |
| H | 3.61948300  | -2.56095100 | 1.01372900  |
| H | 3.14357000  | -1.06473300 | 1.86867400  |
| H | 1.98428400  | -2.40704900 | 1.68363200  |
| N | 1.46081000  | 1.23002600  | -0.46167400 |
| C | 0.70315000  | 2.49368700  | -0.38462600 |
| H | 0.07230600  | 2.59944000  | -1.27175300 |
| H | 0.09296200  | 2.45073800  | 0.52249000  |
| H | 1.40870100  | 3.32682700  | -0.33582700 |
| P | 2.18003100  | -1.20758800 | -0.42938800 |
| C | -0.46446200 | 0.11745200  | 1.41010100  |
| O | -0.35905700 | 1.18673000  | 2.05796700  |
| C | -1.68436000 | -0.14633400 | 0.53811400  |
| C | -1.88239300 | -1.37526200 | -0.10218700 |
| C | -2.66506900 | 0.84295600  | 0.42793300  |
| C | -3.02951600 | -1.60468900 | -0.85969600 |
| H | -1.12929000 | -2.15646200 | -0.00791500 |
| C | -3.81565000 | 0.61791500  | -0.33045200 |

|   |             |             |             |
|---|-------------|-------------|-------------|
| H | -2.51252700 | 1.77412000  | 0.96554800  |
| C | -3.99966200 | -0.60442800 | -0.97934000 |
| H | -3.17136000 | -2.56254800 | -1.35447200 |
| H | -4.57439500 | 1.39329900  | -0.40727500 |
| H | -4.89645600 | -0.78256400 | -1.56745900 |
| H | -0.08428400 | -0.82939600 | 1.86025600  |

**Table S14. Cartesian coordinates of phosphazole -2-ylidene 2, IM-1**

|   |             |             |             |
|---|-------------|-------------|-------------|
| C | 0.97923700  | -0.18339700 | -0.00425100 |
| C | 3.12987500  | 1.13223800  | -0.62215400 |
| C | 2.14105200  | 1.85785500  | -0.06744300 |
| H | 4.05214000  | 1.56794900  | -0.98536200 |
| H | 2.17942700  | 2.92863200  | 0.11773900  |
| C | 3.49874600  | -1.48406700 | 0.54845600  |
| C | 4.55669700  | -1.59034100 | 0.28459500  |
| H | 3.41621100  | -0.94690500 | 1.49715100  |
| H | 3.07251500  | -2.48545600 | 0.66354900  |
| N | 0.93666100  | 1.23573100  | 0.25748000  |
| C | 0.14972000  | 1.76398300  | 1.36998700  |
| H | 0.21122900  | 2.85573700  | 1.34184800  |
| H | -0.89652700 | 1.47799800  | 1.26782900  |
| H | 0.51708000  | 1.41487900  | 2.34479100  |
| P | 2.62959300  | -0.60070300 | -0.85751700 |
| C | -0.22064300 | -1.02203800 | -0.23405000 |
| O | 0.50700500  | -1.07677800 | 1.01720600  |
| C | -1.64321200 | -0.56067800 | -0.20504500 |
| C | -2.22330500 | -0.02714900 | -1.36319300 |
| C | -2.42747600 | -0.71690300 | 0.94447700  |
| C | -3.56516500 | 0.35438700  | -1.36755500 |
| H | -1.62046700 | 0.09286700  | -2.26016500 |
| C | -3.76979400 | -0.33539400 | 0.93842700  |
| H | -1.97311700 | -1.13071100 | 1.83978600  |
| C | -4.34170800 | 0.20170700  | -0.21676400 |
| H | -4.00375800 | 0.77357100  | -2.26928500 |
| H | -4.37008800 | -0.46064200 | 1.83585700  |
| H | -5.38702000 | 0.49881800  | -0.22108400 |
| H | -0.05485400 | -1.90499600 | -0.85986800 |

**Table S15. Cartesian coordinates of phosphazole -2-ylidene 2, TS-2**

|          |                   |                    |                   |
|----------|-------------------|--------------------|-------------------|
| C        | -1.33045400       | -0.68171900        | 0.25412800        |
| C        | -3.24048100       | -2.31790700        | 0.61055200        |
| C        | -3.09949800       | -1.38698600        | 1.57227700        |
| H        | -3.98065200       | -3.10694600        | 0.65597200        |
| H        | -3.67857900       | -1.26985300        | 2.48125800        |
| C        | -2.54361300       | -1.71044300        | -2.20052300       |
| H        | -2.98099100       | -2.59288400        | -2.67625000       |
| H        | -3.30209700       | -0.92972200        | -2.10995700       |
| H        | -1.69841700       | -1.35207600        | -2.79023100       |
| N        | -2.04110400       | -0.47024700        | 1.37272800        |
| C        | -1.74934300       | 0.58215300         | 2.35255500        |
| H        | -2.32325900       | 0.38388100         | 3.25891400        |
| H        | -0.68352100       | 0.57610800         | 2.59071300        |
| H        | -2.01705400       | 1.56229800         | 1.95139800        |
| P        | -1.84532500       | -2.22724200        | -0.54722900       |
| C        | -0.13876200       | 0.03801300         | -0.20790700       |
| O        | 0.24341900        | -0.50442200        | -1.46105200       |
| C        | -0.23898300       | 1.55711300         | -0.23193400       |
| C        | 0.69106400        | 2.34490200         | 0.45558400        |
| C        | -1.23656200       | 2.19297100         | -0.98526200       |
| C        | 0.62260300        | 3.73884200         | 0.40138600        |
| H        | 1.47791800        | 1.86093000         | 1.02810000        |
| C        | -1.30847700       | 3.58467800         | -1.03971800       |
| C        | -1.95067100       | 1.59117000         | -1.54197700       |
| C        | -0.37902400       | 4.36216700         | -0.34380100       |
| H        | 1.35520400        | 4.33595000         | 0.93807100        |
| H        | -2.08693200       | 4.06329000         | -1.62850500       |
| H        | -0.43327900       | 5.44670900         | -0.38756500       |
| H        | 0.75549500        | -0.28852600        | 0.45454800        |
| H        | 1.13793100        | -0.93221100        | -1.17194900       |
| O        | 2.05143800        | -1.30493900        | 0.06038000        |
| C        | 3.41481000        | -1.03701500        | 0.12483800        |
| C        | 3.80587100        | -0.66545500        | 1.57386700        |
| C        | 3.29533400        | 0.25788300         | 1.87942900        |
| H        | 3.49133000        | -1.46331600        | 2.25649800        |
| H        | 4.88624600        | -0.50918400        | 1.69392300        |
| C        | 3.82136500        | 0.10867000         | -0.83063200       |
| H        | 4.89956100        | 0.31624400         | -0.80028200       |
| H        | 3.55312400        | -0.14859300        | -1.86247500       |
| H        | 3.29025500        | 1.03233200         | -0.57021200       |
| C        | 4.17014500        | -2.32634100        | -0.28481800       |
| H        | 3.89590500        | -2.60723300        | -1.30821000       |
| H        | 5.26091800        | -2.20363900        | -0.23839800       |
| <b>H</b> | <b>3.88101300</b> | <b>-3.14923000</b> | <b>0.37835500</b> |

**Table S16. Cartesian coordinates of phosphazole -2-ylidene 2, IM-2**

|   |            |             |             |
|---|------------|-------------|-------------|
| C | 0.99628400 | -0.02273600 | -0.23030100 |
| C | 3.41698700 | 0.81139800  | -0.15312600 |
| C | 2.47274300 | 1.77147200  | -0.16588200 |
| H | 4.47899300 | 1.01828600  | -0.16980800 |
| C | 2.66186600 | 2.84095200  | -0.19132700 |
| H | 2.70796500 | -1.41515200 | 1.57953700  |
| H | 3.70719700 | -1.80147900 | 1.80821200  |
| H | 2.46296200 | -0.60758300 | 2.27522000  |
| H | 1.98777500 | -2.23121900 | 1.70016300  |
| N | 1.13207300 | 1.38824400  | -0.16494400 |
| C | 0.15015900 | 2.28729700  | -0.76507500 |



|          |                   |                    |                    |
|----------|-------------------|--------------------|--------------------|
| H        | 0.59928600        | 3.27750000         | -0.87208300        |
| H        | -0.15130900       | 1.92472000         | -1.75743700        |
| H        | -0.74900600       | 2.37766100         | -0.15152400        |
| P        | 2.66665900        | -0.84153900        | -0.20935700        |
| C        | -0.14657300       | -0.75340300        | -0.34700100        |
| O        | -0.06043300       | -2.10044500        | -0.66976800        |
| C        | -1.54039800       | -0.35487600        | -0.08591100        |
| C        | -2.58841600       | -0.92489400        | -0.83279100        |
| C        | -1.86792000       | 0.52062200         | 0.96546600         |
| C        | -3.91370600       | -0.59383600        | -0.56439000        |
| H        | -2.34796700       | -1.62912300        | -1.62213100        |
| C        | -3.19667600       | 0.84874500         | 1.23275800         |
| H        | -1.07440800       | 0.91518200         | 1.59381400         |
| C        | -4.22495900       | 0.29853900         | 0.46556900         |
| H        | -4.70889100       | -1.03600400        | -1.15914400        |
| H        | -3.42903100       | 1.52206500         | 2.05385700         |
| H        | -5.26054000       | 0.55169400         | 0.67624600         |
| <b>H</b> | <b>0.78920500</b> | <b>-2.25276900</b> | <b>-1.12407400</b> |

**Table S17. Cartesian coordinates of phosphazole -2-ylidene 2, TS-3**

|   |             |             |             |
|---|-------------|-------------|-------------|
| C | -1.79348200 | -0.15518300 | 0.20768000  |
| C | -4.22777200 | -0.64732800 | 0.74919700  |
| C | -3.42819900 | -0.48287700 | 1.81851200  |
| H | -5.27597400 | -0.90721900 | 0.83403000  |
| H | -3.68034000 | -0.56412300 | 2.87055300  |
| C | -3.73135400 | 0.74672900  | -1.81730600 |
| H | -4.68466300 | 0.50299100  | -2.29477000 |
| H | -3.83538000 | 1.66504200  | -1.23617300 |
| H | -2.94830400 | 0.86074800  | -2.56722100 |
| N | -2.06971900 | -0.19777800 | 1.51760500  |
| C | -1.10969700 | -0.10154500 | 2.62280500  |
| H | -1.46907400 | 0.63284900  | 3.34997900  |
| H | -1.01769300 | -1.07681900 | 3.11105000  |
| H | -0.14075700 | 0.21302500  | 2.24617500  |
| P | -3.22073300 | -0.70298000 | -0.76272300 |
| C | -0.55248400 | 0.02535900  | -0.57989300 |
| O | -0.84152300 | -0.16640200 | -1.87280600 |
| C | 0.30775900  | 1.24926000  | -0.31379200 |
| C | 1.38999100  | 1.47886100  | -1.17913400 |
| C | 0.01624200  | 2.22983000  | 0.64457400  |
| C | 2.18825900  | 2.61002600  | -1.04448000 |
| H | 1.57995300  | 0.76525400  | -1.97093500 |
| C | 0.81238600  | 3.37205300  | 0.77715800  |
| H | -0.86629700 | 2.14205300  | 1.27126200  |
| C | 1.91064900  | 3.56094600  | -0.05758200 |
| H | 3.02707600  | 2.75668200  | -1.72010500 |
| H | 0.55725100  | 4.11921800  | 1.52485300  |
| H | 2.53258600  | 4.44642400  | 0.04382300  |
| H | -0.41258000 | -1.57806800 | -1.85856600 |
| C | 0.33766000  | -1.63254400 | -0.13973300 |
| H | -0.15454600 | -1.99253300 | 0.77482700  |
| O | -0.01076200 | -2.33255700 | -1.24761900 |
| C | 1.80702900  | -1.45537100 | 0.07478800  |
| C | 2.69928100  | -1.60849500 | -0.99833600 |
| C | 2.33542400  | -1.17181500 | 1.34352900  |
| C | 4.07168900  | -1.45754100 | -0.81107100 |
| C | 2.29418900  | -1.87290400 | -1.96950200 |
| C | 3.70781700  | -1.01786100 | 1.53302500  |
| H | 1.66927600  | -1.09412500 | 2.19993500  |
| C | 4.58304700  | -1.15456700 | 0.45347100  |
| H | 4.74744500  | -1.58530200 | -1.65335000 |
| H | 4.09579100  | -0.80125800 | 2.52538000  |
| H | 5.65386900  | -1.03872000 | 0.59929100  |

**Table S18. Cartesian coordinates of phosphazole -2-ylidene 2, IM-3**

|   |             |             |             |
|---|-------------|-------------|-------------|
| C | -1.72495300 | -0.32858100 | 0.40512200  |
| C | -4.17231500 | -0.77532200 | 0.13740000  |
| C | -3.80385300 | -0.35379300 | 1.37024700  |
| H | -5.19710000 | -1.04518900 | -0.09244900 |
| H | -4.40806500 | -0.24015800 | 2.26335400  |
| C | -3.06618900 | -0.28336400 | -2.51196000 |
| H | -4.10103600 | -0.52094800 | -2.77807500 |
| H | -2.94631500 | 0.80052000  | -2.45725200 |
| H | -2.37505500 | -0.68670400 | -3.25125900 |
| N | -2.42163100 | -0.07322800 | 1.50875600  |
| C | -1.85720400 | 0.30661100  | 2.80594800  |
| H | -1.06413300 | 1.03824400  | 2.65269900  |
| H | -2.64703200 | 0.75587800  | 3.41144500  |
| H | -1.45868400 | -0.57190300 | 3.32255900  |
| P | -2.68466600 | -1.06570900 | -0.87564700 |
| O | -0.29478900 | -0.26903600 | -0.13509900 |
| C | -0.53271600 | -0.76165900 | -1.40868500 |
| C | 0.17062600  | 1.20257400  | -0.12795500 |
| C | -0.05194800 | 1.98219200  | -1.26867500 |
| C | 0.79062700  | 1.79803100  | 0.98024300  |
| C | 0.31421500  | 3.32784900  | -1.29587000 |
| H | -0.48630800 | 1.49795900  | -2.13587400 |
| C | 1.15947300  | 3.14467600  | 0.95388900  |
| H | 1.03152300  | 1.20540400  | 1.85820800  |
| C | 0.91510500  | 3.91742800  | -0.18197500 |
| H | 0.13796600  | 3.91591000  | -2.19331100 |
| H | 1.65127200  | 3.58423200  | 1.81804600  |
| H | 1.20451900  | 4.96479500  | -0.20376400 |
| H | -0.10803600 | -2.48371900 | -0.56405900 |
| C | 0.66306400  | -1.25498500 | 0.64107000  |
| H | 0.57240400  | -1.10349000 | 1.72478700  |
| O | 0.17955600  | -2.56100700 | 0.37393300  |
| C | 2.13201000  | -1.11400700 | 0.26416400  |
| C | 2.54435200  | -1.08294700 | -1.07705900 |

|   |            |             |             |
|---|------------|-------------|-------------|
| C | 3.10674200 | -1.07281400 | 1.26708400  |
| C | 3.89908800 | -1.00632900 | -1.39626100 |
| H | 1.78939700 | -1.10308000 | -1.85668000 |
| C | 4.46467900 | -0.99942100 | 0.94914800  |
| H | 2.80081900 | -1.10826000 | 2.31150600  |
| C | 4.86453400 | -0.96570900 | -0.38647800 |
| H | 4.20426000 | -0.97775300 | -2.43955900 |
| H | 5.20658600 | -0.97163000 | 1.74352500  |
| H | 5.92011100 | -0.90887600 | -0.64028700 |

**Table S19. Cartesien coordinates of phosphazole -2-ylidene 2, TS-4**

|   |             |             |             |
|---|-------------|-------------|-------------|
| C | -1.83754800 | -0.43751400 | 0.35124500  |
| C | -4.35404900 | -1.04925900 | 0.30626600  |
| C | -3.89714900 | -0.59734800 | 1.48821200  |
| H | -5.37656800 | -1.36837100 | 0.14497100  |
| H | -4.43449400 | -0.48418300 | 2.42420100  |
| C | -3.19587900 | -0.21871100 | -2.30127800 |
| H | -3.98301500 | -0.66408300 | -2.91660500 |
| H | -3.46875000 | 0.80553600  | -2.03909000 |
| H | -2.24838100 | -0.22883100 | -2.84148100 |
| N | -2.51170900 | -0.25638500 | 1.48084700  |
| C | -1.89764900 | 0.23894900  | 2.72005600  |
| H | -0.99806100 | 0.79635300  | 2.46616400  |
| H | -2.60181900 | 0.90151900  | 3.23087200  |
| H | -1.64629300 | -0.59884200 | 3.37799600  |
| P | -2.94614100 | -1.29313000 | -0.80295700 |
| C | 0.00148300  | -0.20661500 | -0.48458900 |
| O | -0.20722600 | -0.62881600 | -1.66303300 |
| C | 0.21118600  | 1.28576100  | -0.27624900 |
| C | -0.17337200 | 2.15719300  | -1.30343400 |
| C | 0.79622200  | 1.82857200  | 0.87712000  |
| C | -0.01215700 | 3.53533900  | -1.17010700 |
| H | -0.58208300 | 1.72723800  | -2.21167000 |
| C | 0.96348200  | 3.20821100  | 1.01129400  |
| H | 1.15797100  | 1.17519500  | 1.66545800  |
| C | 0.55225500  | 4.06780100  | -0.00855700 |
| H | -0.31774400 | 4.19593700  | -1.97791600 |
| H | 1.42866500  | 3.60946500  | 1.90826600  |
| H | 0.68416800  | 5.14171900  | 0.09485300  |
| H | 0.08436600  | -2.40302700 | -0.86210700 |
| C | 0.80472900  | -1.20202000 | 0.40849000  |
| H | 0.59237300  | -1.04092200 | 1.47100800  |
| O | 0.34386300  | -2.50194400 | 0.08042100  |
| C | 2.31233800  | -1.07502000 | 0.19708100  |
| C | 2.87240500  | -1.03437700 | -1.08856200 |
| C | 3.17072700  | -1.04477500 | 1.30214800  |
| C | 4.25432000  | -0.96059200 | -1.25666800 |
| H | 2.21373500  | -1.04795100 | -1.95113800 |
| C | 4.55538900  | -0.97255700 | 1.13690700  |
| H | 2.75106100  | -1.08909200 | 2.30578400  |
| C | 5.10154800  | -0.92943400 | -0.14586100 |
| H | 4.67250600  | -0.92515300 | -2.25969900 |
| H | 5.20487100  | -0.95365900 | 2.00872600  |
| H | 6.17877600  | -0.87275300 | -0.28036500 |

**Table S20. Cartesien coordinates of oxazole-2-ylidene 3**

|   |             |             |             |
|---|-------------|-------------|-------------|
| C | -0.08993000 | -1.19253000 | -0.00010400 |
| C | -0.21228700 | 1.09912600  | 0.00007100  |
| C | -1.46432400 | 0.61239100  | -0.00009300 |
| H | 0.16382100  | 2.11063200  | 0.00019700  |
| H | -2.44209500 | 1.06781100  | -0.00015200 |
| N | 0.61457600  | -0.03096500 | 0.00006200  |
| C | 2.06804100  | 0.00253600  | 0.00019600  |
| H | 2.44389300  | 0.51470600  | -0.89175400 |
| H | 2.44373200  | 0.51457100  | 0.89229300  |
| H | 2.41540200  | -1.03108800 | 0.00014900  |
| O | -1.39197400 | -0.76112700 | -0.00019900 |

**Table S21. Cartesien coordinates of oxazole-2-ylidene 3, TS-1**

|   |             |             |             |
|---|-------------|-------------|-------------|
| C | 1.32787900  | -0.28425500 | 0.23632200  |
| C | 3.31331100  | -0.30177000 | -0.80584700 |
| C | 3.15432500  | -1.48276300 | -0.18388100 |
| H | 4.11776500  | 0.08934500  | -1.40869900 |
| H | 3.75336500  | -2.37352100 | -0.09019000 |
| N | 2.15899900  | 0.43528100  | -0.52296400 |
| C | 1.87418900  | 1.80360500  | -0.96874100 |
| H | 1.16888500  | 2.22368700  | -0.24247500 |
| H | 2.80723900  | 2.37164600  | -0.97681200 |
| H | 1.44371400  | 1.78572000  | -1.97358000 |
| O | 1.93336300  | -1.46632300 | 0.45827900  |
| C | -0.02075900 | 0.45851000  | 1.29798300  |
| H | 0.15155400  | -0.26635500 | 2.13040000  |
| C | -1.29353000 | 0.08360100  | 0.53525900  |
| C | -2.08427700 | 1.10323700  | 0.00289800  |
| C | -1.70878500 | -1.24601500 | 0.40033900  |
| C | -3.26773300 | 0.79917400  | -0.67345400 |
| H | -1.75731200 | 2.12835000  | 0.15013600  |
| C | -2.88945100 | -1.55404000 | -0.27444900 |
| H | -1.10169000 | -2.04349200 | 0.82721400  |
| C | -3.67170900 | -0.52954900 | -0.81675500 |
| H | -3.87984200 | 1.59966000  | -1.08273200 |
| H | -3.20422500 | -2.59020700 | -0.37417900 |
| H | -4.59481700 | -0.76753300 | -1.33951700 |
| O | 0.26433800  | 1.67848800  | 1.48461300  |

**Table S22. Cartesian coordinates of oxazole-2-ylidene 3, IM-1**

|   |             |             |             |
|---|-------------|-------------|-------------|
| C | 1.38256000  | 0.24980000  | -0.35711400 |
| C | 3.09470200  | 0.04205900  | 1.04653800  |
| C | 3.48350000  | 0.81383400  | 0.01785500  |
| H | 3.62640200  | -0.30190600 | 1.91960500  |
| H | 4.39764400  | 1.31597400  | -0.24928500 |
| N | 1.76071500  | -0.28941700 | 0.81719800  |
| C | 0.98341200  | -1.30469600 | 1.52783500  |
| H | 0.66052000  | -2.02532900 | 0.77017400  |
| H | 1.62401000  | -1.76990600 | 2.27873100  |
| H | 0.11419600  | -0.85149400 | 2.00845200  |
| O | 2.41113200  | 0.95987600  | -0.84227000 |
| C | 0.20408600  | -0.13903900 | -1.22975800 |
| H | 0.24353800  | 0.56401900  | -2.09886800 |
| C | -1.15779500 | 0.08710400  | -0.54506600 |
| C | -2.04109200 | -0.99018800 | -0.46969900 |
| C | -1.55168800 | 1.33416600  | -0.04660600 |
| C | -3.30569500 | -0.82754700 | 0.10061600  |
| H | -1.70447500 | -1.94200200 | -0.87113900 |
| C | -2.81058900 | 1.49821300  | 0.53294200  |
| H | -0.87217600 | 2.18363800  | -0.11431500 |
| C | -3.69204700 | 0.41539600  | 0.60647900  |
| H | -3.99097500 | -1.67061300 | 0.15087400  |
| H | -3.10716600 | 2.46940400  | 0.92217400  |
| H | -4.67493900 | 0.54310700  | 1.05322300  |
| O | 0.56665300  | -1.40532500 | -1.48199800 |

**Table S23. Cartesian coordinates of oxazole-2-ylidene 3, TS-2**

|   |             |             |             |
|---|-------------|-------------|-------------|
| C | -0.41632600 | -1.67793800 | -0.08167400 |
| C | 0.11984000  | -3.77840800 | 0.39849500  |
| C | -1.03641700 | -3.48707100 | 1.01654500  |
| H | 0.70694700  | -4.68260100 | 0.37650000  |
| H | -1.71407600 | -4.03097000 | 1.65244400  |
| N | 0.51242900  | -2.63092800 | -0.29070300 |
| C | 1.79008300  | -2.46636800 | -1.00277800 |
| H | 2.41007900  | -3.33212900 | -0.76199500 |
| H | 1.60745600  | -2.41821400 | -2.07650300 |
| H | 2.26149300  | -1.53137500 | -0.66262600 |
| O | -1.37359400 | -2.18495800 | 0.71525500  |
| C | -0.35976100 | -0.28582800 | -0.49481700 |
| H | 0.63671600  | 0.15841400  | 0.09007500  |
| C | -1.59580300 | 0.53936500  | -0.23933700 |
| C | -2.27470500 | 1.13330700  | -1.31025900 |
| C | -2.05506900 | 0.77141400  | 1.06569900  |
| C | -3.40024400 | 1.92563400  | -1.08184700 |
| H | -1.90022600 | 0.97219800  | -2.31520300 |
| C | -3.18361500 | 1.55837700  | 1.29226300  |
| C | -1.52234600 | 0.34072800  | 1.91011600  |
| C | -3.86244500 | 2.13786600  | 0.21810100  |
| H | -3.91700100 | 2.37994200  | -1.92366100 |
| H | -3.52523700 | 1.72933400  | 2.31006200  |
| H | -4.73800900 | 2.75715700  | 0.39463600  |
| O | 0.15098800  | -0.19867600 | -1.81869600 |
| H | 1.02416400  | 0.24911600  | -1.64465100 |
| O | 2.04759500  | 0.42408600  | -0.18486000 |
| C | 2.69425100  | 1.55771100  | 0.33187700  |
| C | 4.08252200  | 1.65802500  | -0.33399400 |
| H | 4.65231600  | 2.52592700  | 0.02303900  |
| H | 4.66527900  | 0.75318200  | -0.12463900 |
| H | 3.96981300  | 1.74223200  | -1.42121700 |
| C | 1.88254300  | 2.83318200  | 0.02312100  |
| H | 0.88513700  | 2.77103800  | 0.47505600  |
| H | 2.37286400  | 3.73798000  | 0.40545200  |
| H | 1.75470900  | 2.94582500  | -1.06019700 |
| C | 2.86267600  | 1.40603000  | 1.85885800  |
| H | 3.41213900  | 2.24527100  | 2.30518100  |
| H | 1.88045900  | 1.34800000  | 2.34477600  |
| H | 3.40522800  | 0.48004100  | 2.08316900  |

**Table S24. Cartesian coordinates of oxazole-2-ylidene 3, IM-2**

|   |             |             |             |
|---|-------------|-------------|-------------|
| C | 1.26149600  | -0.08728100 | -0.09342200 |
| C | 3.36435500  | -0.88855900 | -0.16717400 |
| C | 2.52307400  | -1.91901100 | -0.28684400 |
| H | 4.44333700  | -0.86203800 | -0.16668600 |
| H | 2.65354300  | -2.97858500 | -0.42977400 |
| N | 2.60921300  | 0.28938200  | -0.07503900 |
| C | 3.12905500  | 1.49520900  | 0.55433100  |
| H | 4.19497200  | 1.56936800  | 0.32283900  |
| H | 2.60855700  | 2.36628100  | 0.16148600  |
| H | 3.00598800  | 1.46849600  | 1.64720100  |
| O | 1.21482000  | -1.45897900 | -0.25097000 |
| C | 0.13850000  | 0.68381400  | -0.05221800 |
| C | -1.24950100 | 0.22667300  | -0.01857100 |
| C | -2.27455200 | 1.13976200  | -0.35243900 |
| C | -1.63935900 | -1.07253300 | 0.37886400  |
| C | -3.61761200 | 0.77388300  | -0.29162300 |
| C | -2.00553000 | 2.13488600  | -0.69230800 |
| C | -2.98275100 | -1.42982000 | 0.43237600  |
| H | -0.88450400 | -1.79965900 | 0.65164700  |
| C | -3.98515800 | -0.51306900 | 0.10142400  |
| H | -4.38018400 | 1.50029200  | -0.56284100 |
| H | -3.25047800 | -2.43665100 | 0.74448500  |
| H | -5.03232300 | -0.79933600 | 0.14763300  |
| O | 0.35271800  | 2.06811500  | -0.13673100 |
| H | -0.16345300 | 2.48376100  | 0.57496600  |

**Table S25. Cartesian coordinates of oxazole-2-ylidene 3, TS-3**

|   |             |             |             |
|---|-------------|-------------|-------------|
| C | -2.02316800 | 0.25834000  | 0.24425200  |
| C | -4.00052800 | -0.18273200 | 1.15933300  |
| C | -3.23217800 | 0.40879100  | 2.08757000  |
| H | -5.01514800 | -0.54518800 | 1.20075200  |
| H | -3.37115000 | 0.70246200  | 3.11426300  |
| N | -3.23437100 | -0.27269600 | -0.00369000 |
| C | -3.69670900 | -0.92175600 | -1.24528600 |
| H | -4.72626500 | -1.24374800 | -1.07472100 |
| H | -3.63437400 | -0.21351500 | -2.06735200 |
| H | -3.05444500 | -1.77637000 | -1.46044800 |
| O | -2.00780800 | 0.68327800  | 1.51811000  |
| C | -0.86045900 | 0.26643200  | -0.65728400 |
| C | 0.21019200  | 1.30031200  | -0.35576800 |
| C | 0.71042000  | 2.01806800  | -1.45057000 |
| C | 0.73002100  | 1.57424300  | 0.91830000  |
| C | 1.69665400  | 2.98849700  | -1.27912200 |
| C | 0.30159000  | 1.79350300  | -2.42924400 |
| C | 1.71337200  | 2.54910000  | 1.08935100  |
| C | 0.38532400  | 1.02154300  | 1.78448300  |
| C | 2.20068200  | 3.26221800  | -0.00673000 |
| H | 2.06961300  | 3.53449300  | -2.14241100 |
| H | 2.10643000  | 2.74336400  | 2.08432900  |
| H | 2.96894200  | 4.01912600  | 0.12991900  |
| O | -1.23132300 | 0.14563300  | -1.92796300 |
| H | -0.89560000 | -1.21936200 | -2.00933900 |
| C | -0.25105600 | -1.54361600 | -0.26668200 |
| H | -0.85654100 | -1.88689300 | 0.58624500  |
| O | -0.61892600 | -2.09300100 | -1.45144900 |
| C | 1.20144400  | -1.58056400 | 0.06097300  |
| C | 1.63373800  | -1.65727600 | 1.39271000  |
| C | 2.16469800  | -1.55574500 | -0.95901500 |
| C | 2.99276000  | -1.69852200 | 1.70291600  |
| H | 0.89538400  | -1.70044200 | 2.19204200  |
| C | 3.52221400  | -1.59512900 | -0.65055900 |
| H | 1.83023700  | -1.52373200 | -1.99082100 |
| C | 3.94302900  | -1.66426900 | 0.68074500  |
| H | 3.30983900  | -1.76599600 | 2.74082400  |
| H | 4.25733600  | -1.57670500 | -1.45143200 |
| H | 5.00313100  | -1.69929900 | 0.91835300  |

**Table S26. Cartesian coordinates of oxazole-2-ylidene 3, IM-3**

|   |             |             |             |
|---|-------------|-------------|-------------|
| C | -1.98642300 | -0.48271100 | 0.19851800  |
| C | -4.18334900 | -0.70084700 | 0.44932900  |
| C | -3.60027800 | -0.90880200 | 1.64193000  |
| H | -5.21688200 | -0.71969400 | 0.14225400  |
| H | -3.95523700 | -1.15861400 | 2.62770800  |
| N | -3.14957700 | -0.43570500 | -0.45121500 |
| C | -3.33469800 | -0.11936500 | -1.87667400 |
| H | -3.69485000 | 0.90852900  | -1.97031400 |
| H | -2.34347500 | -0.24475000 | -2.32966900 |
| H | -4.06943800 | -0.81350200 | -2.29104600 |
| O | -2.24150400 | -0.76917300 | 1.48081000  |
| C | -0.55051000 | -0.32691600 | -0.39110300 |
| C | -0.14507500 | 1.14193900  | -0.12367600 |
| C | 0.21421800  | 1.92527800  | -1.22311900 |
| C | -0.12495700 | 1.71218000  | 1.15654300  |
| C | 0.59678400  | 3.25605400  | -1.04853600 |
| H | 0.19278500  | 1.45450600  | -2.20032400 |
| C | 0.25478800  | 3.04346700  | 1.33180700  |
| H | -0.40006700 | 1.11865900  | 2.02567300  |
| C | 0.61646500  | 3.81998600  | 0.22851500  |
| C | 0.88179000  | 3.85404400  | -1.91094600 |
| H | 0.27180800  | 3.47360000  | 2.33033300  |
| H | 0.91396800  | 4.85657600  | 0.36542000  |
| O | -0.58687800 | -0.69349700 | -1.68006500 |
| H | -0.30658700 | -2.38019800 | -1.02977600 |
| C | 0.33941100  | -1.38496400 | 0.41421400  |
| H | 0.10688200  | -1.35884100 | 1.48490800  |
| O | -0.08679500 | -2.63610700 | -0.09545000 |
| C | 1.82872800  | -1.15144100 | 0.24046300  |
| C | 2.63150500  | -0.87307800 | 1.35183900  |
| C | 2.43454100  | -1.23820300 | -1.02204400 |
| C | 4.00810600  | -0.68174000 | 1.21557500  |
| H | 2.17590600  | -0.81225900 | 2.33842900  |
| C | 3.80784200  | -1.04524100 | -1.16114500 |
| H | 1.81344000  | -1.43576000 | -1.88878200 |
| C | 4.60079600  | -0.76818300 | -0.04387100 |
| H | 4.61518100  | -0.47116000 | 2.09278300  |
| H | 4.26326600  | -1.11194000 | -2.14641000 |
| H | 5.67259800  | -0.62352300 | -0.15547900 |

**Table S27. Cartesian coordinates of oxazole-2-ylidene 3, TS-4**

|   |             |             |             |
|---|-------------|-------------|-------------|
| C | 2.11368000  | -0.48246900 | -0.26394400 |
| C | 4.29815600  | -0.97556100 | -0.42826400 |
| C | 3.74047300  | -1.12758900 | -1.64070200 |
| H | 5.30977400  | -1.11318400 | -0.08016500 |
| H | 4.10651400  | -1.42687900 | -2.60894500 |
| N | 3.25878500  | -0.57076200 | 0.41852900  |
| C | 3.40905200  | -0.26003700 | 1.84468000  |
| H | 3.97469500  | 0.66901000  | 1.95830200  |
| H | 2.40427300  | -0.16162500 | 2.26139600  |
| H | 3.94485200  | -1.07826600 | 2.33279600  |
| O | 2.40073600  | -0.81989400 | -1.53444700 |
| C | 0.33446100  | -0.21439000 | 0.53705600  |
| C | 0.08391200  | 1.24597600  | 0.18726100  |
| C | -0.14157800 | 2.14353300  | 1.23526900  |

|   |             |             |             |
|---|-------------|-------------|-------------|
| C | 0.04413700  | 1.71802900  | -1.13192800 |
| C | -0.39949000 | 3.49007800  | 0.97374400  |
| H | -0.11757700 | 1.75915400  | 2.24966700  |
| C | -0.21304900 | 3.06263300  | -1.39516500 |
| H | 0.22500900  | 1.03626900  | -1.95895200 |
| C | -0.43562800 | 3.95393900  | -0.34193600 |
| H | -0.57677300 | 4.17665900  | 1.79800800  |
| H | -0.24088200 | 3.41617300  | -2.42290800 |
| H | -0.63822500 | 5.00186900  | -0.54803400 |
| O | 0.45486700  | -0.53450700 | 1.76274400  |
| H | 0.24422700  | -2.33267600 | 1.11766700  |
| C | -0.41633800 | -1.29635800 | -0.31181600 |
| H | -0.13722700 | -1.23277700 | -1.36832000 |
| O | 0.03430600  | -2.54725400 | 0.18016400  |
| C | -1.92725600 | -1.13623900 | -0.20213100 |
| C | -2.69730900 | -0.90558600 | -1.34669400 |
| C | -2.57673300 | -1.23688100 | 1.03668700  |
| C | -4.08543500 | -0.77641500 | -1.26463900 |
| H | -2.20645000 | -0.83267100 | -2.31518400 |
| C | -3.96174800 | -1.10822000 | 1.12219600  |
| H | -1.98604400 | -1.40177700 | 1.93213900  |
| C | -4.72199600 | -0.87815900 | -0.02792500 |
| H | -4.66707200 | -0.60140300 | -2.16641200 |
| H | -4.45120200 | -1.18639000 | 2.08998900  |
| H | -5.80252900 | -0.78060800 | 0.04106700  |

**Table S28. Cartesien coordinates of thiazole-2-ylidene 4**

|   |             |             |             |
|---|-------------|-------------|-------------|
| C | 0.09789300  | -1.16777300 | 0.00000000  |
| C | 0.32780000  | 1.19998900  | 0.00000000  |
| C | -1.02058500 | 1.15658200  | -0.00000200 |
| H | 0.96618300  | 2.07505100  | 0.00000600  |
| H | -1.70364400 | 1.99466000  | 0.00000100  |
| S | -1.51936300 | -0.52366100 | 0.00000000  |
| N | 0.90121600  | -0.07949600 | 0.00000000  |
| C | 2.35873900  | -0.23612400 | 0.00000000  |
| H | 2.79277000  | 0.22692500  | -0.89241000 |
| H | 2.79276000  | 0.22679300  | 0.89248300  |
| H | 2.57015000  | -1.30442900 | -0.00007700 |

**Table S29. Cartesien coordinates of thiazole-2-ylidene 4, TS-1**

|   |             |             |             |
|---|-------------|-------------|-------------|
| C | -1.19557500 | 0.01638000  | -0.33517800 |
| C | -2.88118900 | 1.29612900  | 0.61515000  |
| C | -3.40225500 | 0.06150100  | 0.79984600  |
| H | -3.29573500 | 2.25650200  | 0.89824300  |
| H | -4.34522500 | -0.17428700 | 1.27354300  |
| S | -2.34064700 | -1.17147000 | 0.16947900  |
| N | -1.64092100 | 1.24221300  | -0.02301400 |
| C | -0.88497500 | 2.45817100  | -0.34643700 |
| H | -0.91604300 | 3.14052300  | 0.50661200  |
| H | 0.14878900  | 2.18113200  | -0.54902300 |
| H | -1.31942600 | 2.94885400  | -1.22265500 |
| C | 0.17446900  | -0.96275400 | -1.13457300 |
| H | 0.08374000  | -0.50620000 | -2.15182000 |
| O | -0.18558200 | -2.16420000 | -0.95305300 |
| C | 1.43565500  | -0.44454300 | -0.44608200 |
| C | 2.19343800  | 0.59605200  | -0.99333400 |
| C | 1.87470700  | -1.06206400 | 0.72967900  |
| C | 3.35809300  | 1.03848300  | -0.35964000 |
| H | 1.88305000  | 1.04479700  | -1.93705000 |
| C | 3.03300000  | -0.62107400 | 1.36711600  |
| H | 1.29882400  | -1.90163900 | 1.10820600  |
| C | 3.77598600  | 0.43433200  | 0.82741500  |
| H | 3.94514400  | 1.84160300  | -0.79905800 |
| H | 3.36666300  | -1.10556900 | 2.28178700  |
| H | 4.68354200  | 0.77223500  | 1.32130200  |

**Table S30. Cartesien coordinates of thiazole-2-ylidene 4, IM-1**

|   |             |             |             |
|---|-------------|-------------|-------------|
| C | 1.17222700  | 0.01457200  | -0.35329100 |
| C | 2.74281300  | 1.24805800  | -0.75858400 |
| C | 3.25515700  | 0.00453900  | -0.91306700 |
| H | 3.12865000  | 2.19676200  | -1.11245700 |
| H | 4.16922500  | -0.24399500 | -1.43499500 |
| S | 2.25504900  | -1.21741800 | -0.12676400 |
| N | 1.55288400  | 1.23954400  | -0.02832200 |
| C | 0.79548200  | 2.45533900  | 0.28634500  |
| H | 1.36206600  | 3.31846300  | -0.06551500 |
| H | -0.18103600 | 2.42401800  | -0.20034200 |
| C | 0.65398100  | 2.52901500  | 1.36747700  |
| H | 0.02182300  | -0.64972600 | 1.14673600  |
| H | 0.01095100  | -0.11751800 | 2.13888200  |
| O | 0.35096200  | -1.93869700 | 1.16822700  |
| C | -1.32525000 | -0.31223000 | 0.45814800  |
| C | -2.12693400 | 0.76356500  | 0.85255700  |
| C | -1.77020300 | -1.15110300 | -0.56874200 |
| C | -3.34248800 | 1.01947200  | 0.21048300  |
| H | -1.81638100 | 1.39026500  | 1.68805600  |
| C | -2.97824900 | -0.89560400 | -1.21541100 |
| H | -1.16226400 | -2.01752200 | -0.81137400 |
| C | -3.76634400 | 0.19442700  | -0.83211700 |
| H | -3.96311600 | 1.85140400  | 0.53534300  |
| H | -3.31564900 | -1.55437800 | -2.01218700 |
| H | -4.71329600 | 0.38709900  | -1.33004900 |

**Table S31. Cartesien coordinates of thiazole-2-ylidene 4, TS-2**

|   |            |             |             |
|---|------------|-------------|-------------|
| C | 1.30368400 | -0.99934900 | -0.05244700 |
| C | 2.93940100 | -2.15499100 | 1.08145400  |

|   |             |             |             |
|---|-------------|-------------|-------------|
| C | 2.79767000  | -2.96983100 | 0.01583900  |
| H | 3.60521400  | -2.27103900 | 1.92621700  |
| H | 3.32957100  | -3.89052200 | -0.17512900 |
| S | 1.58255300  | -2.36097700 | -1.08494200 |
| N | 2.09409200  | -1.04840100 | 1.04392500  |
| C | 2.03884900  | -0.06145200 | 2.12743200  |
| H | 2.64820400  | -0.42751900 | 2.95484800  |
| H | 2.41599700  | 0.90425900  | 1.78597600  |
| H | 1.00610300  | 0.05683200  | 2.46234600  |
| C | 0.23203600  | -0.07153200 | -0.39998300 |
| H | -0.75037700 | -0.36870700 | 0.23086900  |
| O | -0.22950900 | -0.43716800 | -1.69290000 |
| C | 0.56065900  | 1.40692700  | -0.28309400 |
| C | -0.08387300 | 2.21967400  | 0.65624800  |
| C | 1.49232900  | 1.98872900  | -1.15558800 |
| C | 0.20695800  | 3.58398100  | 0.73702600  |
| H | -0.82468900 | 1.78227800  | 1.32053900  |
| C | 1.78240800  | 3.35019600  | -1.07868700 |
| H | 1.97303000  | 1.36984300  | -1.90866200 |
| C | 1.14257100  | 4.15127000  | -0.12830400 |
| H | -0.30507700 | 4.20256900  | 1.46948400  |
| H | 2.50504600  | 3.78857900  | -1.76226400 |
| H | 1.36757700  | 5.21293700  | -0.06958300 |
| O | -1.15264700 | -0.77729100 | -1.43679600 |
| C | -2.05500300 | -1.11451700 | -0.06346200 |
| C | -3.32947800 | -0.59629200 | 0.17034700  |
| C | -4.35653900 | -1.65867400 | -0.28738500 |
| H | -4.18957800 | -2.59373700 | 0.25912200  |
| H | -5.39364200 | -1.33628300 | -0.12257100 |
| H | -4.22387400 | -1.86600100 | -1.35556300 |
| C | -3.57073300 | 0.71114000  | -0.61797600 |
| H | -4.58162400 | 1.11175000  | -0.46301300 |
| H | -2.85129400 | 1.48210800  | -0.31624200 |
| H | -3.43627000 | 0.53338900  | -1.69179800 |
| C | -3.51939300 | -0.33088900 | 1.68141000  |
| H | -2.81605900 | 0.44008400  | 2.02486800  |
| H | -4.53455100 | 0.00885900  | 1.92644500  |
| H | -3.31374000 | -1.24790700 | 2.24564300  |

**Table S32. Cartesian coordinates of thiazole-2-ylidene 4, IM-2**

|   |             |             |             |
|---|-------------|-------------|-------------|
| C | -1.19503200 | -0.21672400 | 0.00162600  |
| C | -2.81831100 | 1.45250000  | 0.00939200  |
| C | -3.61559600 | 0.41033300  | -0.26544900 |
| H | -3.11978800 | 2.48822800  | 0.10477200  |
| H | -4.68063600 | 0.43233900  | -0.44366800 |
| S | -2.71743200 | -1.11216700 | -0.29939600 |
| N | -1.46576400 | 1.14578200  | 0.19537200  |
| C | -0.64349400 | 1.96967600  | 1.07760500  |
| H | -1.22497100 | 2.84240100  | 1.38347100  |
| H | -0.36032600 | 1.39793200  | 1.96973300  |
| H | 0.27336800  | 2.30807000  | 0.58673200  |
| C | -0.00527900 | -0.87631400 | 0.05434800  |
| O | -0.13530700 | -2.26519400 | 0.16088800  |
| C | 1.35601700  | -0.34740700 | -0.02111500 |
| C | 1.67985700  | 0.79435100  | -0.78607300 |
| C | 2.41490000  | -1.04796000 | 0.59660900  |
| C | 2.99674400  | 1.23628600  | -0.89031500 |
| H | 0.89357800  | 1.30705400  | -1.33298200 |
| C | 3.73003300  | -0.60514100 | 0.48209400  |
| H | 2.18666800  | -1.93335000 | 1.18262100  |
| C | 4.03047700  | 0.54350000  | -0.25481700 |
| H | 3.21980900  | 2.11510100  | -1.49040400 |
| H | 4.52544800  | -1.15684300 | 0.97715600  |
| H | 5.05724600  | 0.88775600  | -0.34210500 |
| H | 0.46941200  | -2.67153800 | -0.48313400 |

**Table S33. Cartesian coordinates of thiazole-2-ylidene 4, TS-3**

|   |             |             |             |
|---|-------------|-------------|-------------|
| C | -0.02343800 | 1.24569500  | -0.37349800 |
| C | -1.54853500 | 1.69890300  | -2.04057200 |
| C | -1.87103300 | 2.68850900  | -1.18508000 |
| H | -1.99136200 | 1.47753400  | -3.00278500 |
| H | -2.64162000 | 3.43426500  | -1.31700600 |
| S | -0.85724100 | 2.64224700  | 0.23933200  |
| N | -0.50289000 | 0.89154600  | -1.59276800 |
| C | 0.01683300  | -0.18996100 | -2.43701400 |
| H | -0.33290200 | -0.01996600 | -3.45665100 |
| H | 1.10548500  | -0.18288700 | -2.42449400 |
| H | -0.35214800 | -1.15536900 | -2.08441200 |
| C | 0.95037900  | 0.72373600  | 0.58072400  |
| O | 1.12251200  | 1.59831600  | 1.55849600  |
| C | 2.18421400  | -0.04303400 | 0.15402700  |
| C | 2.19183600  | -1.34244600 | -0.37386300 |
| C | 3.41958300  | 0.58796600  | 0.37656100  |
| C | 3.39118400  | -1.97867300 | -0.70209600 |
| H | 1.25777400  | -1.87381600 | -0.52006900 |
| C | 4.61699200  | -0.04536400 | 0.04973500  |
| H | 3.41366700  | 1.57509600  | 0.82526800  |
| C | 4.60940100  | -1.33104200 | -0.49631600 |
| H | 3.37067200  | -2.98865700 | -1.10418500 |
| H | 5.56039300  | 0.46505000  | 0.22698800  |
| H | 5.54311100  | -1.82779000 | -0.74652100 |
| H | 0.25333100  | 0.94918100  | 2.52676200  |
| C | -0.27834100 | -0.61574500 | 1.63704700  |
| H | 0.54196300  | -1.33485100 | 1.75885300  |
| O | -0.50100600 | 0.21662500  | 2.65691300  |
| C | -1.47283200 | -1.15934900 | 0.96069300  |
| C | -2.70529000 | -0.48223800 | 1.01865500  |
| C | -1.41770300 | -2.38154500 | 0.26461400  |
| C | -3.82646300 | -0.98943000 | 0.36546100  |

|   |             |             |             |
|---|-------------|-------------|-------------|
| H | -2.76564200 | 0.43052600  | 1.60129700  |
| C | -2.54104000 | -2.88861400 | -0.38705700 |
| H | -0.49187000 | -2.95289400 | 0.26338300  |
| C | -3.75059600 | -2.18937300 | -0.34779100 |
| H | -4.77043100 | -0.45287500 | 0.42359600  |
| H | -2.47792400 | -3.83979100 | -0.91009000 |
| H | -4.62936600 | -2.58704000 | -0.84851600 |

**Table S34. Cartesian coordinates of thiazole-2-ylidene 4, IM-3**

|   |             |             |             |
|---|-------------|-------------|-------------|
| C | 0.10263100  | -1.27466100 | 0.21211700  |
| C | -0.93898100 | -2.33546000 | 1.95430800  |
| C | -0.77610500 | -3.38142400 | 1.11329700  |
| H | -1.38625300 | -2.31891000 | 2.94022800  |
| H | -1.07531300 | -4.40404600 | 1.29748400  |
| S | 0.04044400  | -2.89413600 | -0.35623400 |
| N | -0.43156300 | -1.14486100 | 1.43454600  |
| C | -0.52433200 | 0.10315400  | 2.20758800  |
| H | -0.47667800 | -0.15318900 | 3.26784200  |
| H | 0.31600400  | 0.74592100  | 1.95547500  |
| H | -1.46652900 | 0.60784900  | 1.98450500  |
| C | 0.76126200  | -0.38240200 | -0.86454300 |
| O | 1.20913200  | -1.28286000 | -1.76791200 |
| C | 1.90933000  | 0.45576700  | -0.25448800 |
| C | 1.76929200  | 1.74219500  | 0.28385200  |
| C | 3.18789700  | -0.11931100 | -0.27809300 |
| C | 2.87402500  | 2.43017300  | 0.79634400  |
| H | 0.79990400  | 2.22746200  | 0.29675400  |
| C | 4.28877800  | 0.56166800  | 0.23859100  |
| H | 3.29249700  | -1.09439400 | -0.74072200 |
| C | 4.13708900  | 1.84047100  | 0.78085500  |
| H | 2.74285400  | 3.43171300  | 1.19887700  |
| H | 5.27154600  | 0.09742600  | 0.20799800  |
| H | 4.99658300  | 2.37520500  | 1.17685300  |
| H | -0.05719600 | -0.91153200 | -2.77188700 |
| C | -0.38079800 | 0.53489600  | -1.64987800 |
| H | 0.20581400  | 1.38721300  | -2.03329300 |
| O | -0.83818200 | -0.28234100 | -2.68299600 |
| C | -1.56549000 | 1.05871900  | -0.86701100 |
| C | -2.64553300 | 0.21109200  | -0.56981400 |
| C | -1.64905500 | 2.39872800  | -0.46350700 |
| C | -3.73738500 | 0.67206200  | 0.16450500  |
| H | -2.62785800 | -0.80533200 | -0.95011100 |
| C | -2.74123700 | 2.86605500  | 0.27151700  |
| H | -0.86233800 | 3.09265000  | -0.74971400 |
| C | -3.78495900 | 2.00039300  | 0.60158500  |
| H | -4.56322100 | -0.00097600 | 0.38291700  |
| H | -2.78290900 | 3.91047100  | 0.57039300  |
| H | -4.63924800 | 2.36158400  | 1.16822700  |

**Table S35. Cartesian coordinates of thiazole-2-ylidene 4, TS-4**

|   |             |             |             |
|---|-------------|-------------|-------------|
| C | 0.07568000  | 1.32619300  | -0.19692300 |
| C | -0.62809200 | 2.74953200  | -1.89826500 |
| C | -0.35842700 | 3.67183700  | -0.94748500 |
| H | -0.98940600 | 2.90787600  | -2.90675300 |
| H | -0.45872400 | 4.74454300  | -1.03647400 |
| S | 0.23032200  | 2.90217100  | 0.49758500  |
| N | -0.37137600 | 1.45082500  | -1.45582700 |
| C | -0.62671700 | 0.29221100  | -2.32521700 |
| H | -0.48695600 | 0.59643700  | -3.36483300 |
| H | 0.08443700  | -0.49440300 | -2.07990800 |
| C | -1.64634700 | -0.06939900 | -2.17169400 |
| C | 0.80956700  | 0.08694400  | 1.18506200  |
| O | 1.25155700  | 0.91711200  | 2.03820400  |
| C | 1.85380800  | -0.65928400 | 0.36068500  |
| C | 1.58538200  | -1.77556800 | -0.44442100 |
| C | 3.17724100  | -0.20402200 | 0.44998800  |
| C | 2.61046600  | -2.41003400 | -1.15076900 |
| H | 0.57618400  | -2.16171100 | -0.52128400 |
| C | 4.19985200  | -0.83334700 | -0.25751200 |
| H | 3.37851700  | 0.64372800  | 1.09566700  |
| C | 3.92105500  | -1.93962100 | -1.06347200 |
| H | 2.38206200  | -3.27810200 | -1.76446700 |
| H | 5.21913700  | -0.46421900 | -0.17417900 |
| H | 4.71834800  | -2.43483000 | -1.61175600 |
| H | -0.20798200 | 0.67259300  | 2.99765900  |
| C | -0.45286300 | -0.71627600 | 1.75466500  |
| H | 0.00096200  | -1.64343000 | 2.15350700  |
| O | -0.96995400 | 0.07277300  | 2.79750300  |
| C | -1.59963700 | -1.10917700 | 0.84258800  |
| C | -2.60932400 | -0.18144700 | 0.54381700  |
| C | -1.73592500 | -2.41406500 | 0.35113900  |
| C | -3.68665200 | -0.53256900 | -0.26992900 |
| H | -2.55522800 | 0.80513400  | 0.99092100  |
| C | -2.80981700 | -2.76983900 | -0.46873400 |
| H | -1.00545400 | -3.16961400 | 0.63162300  |
| C | -3.78614700 | -1.82672800 | -0.79132400 |
| H | -4.46220300 | 0.19966300  | -0.48261100 |
| H | -2.89274700 | -3.78960300 | -0.83612900 |
| H | -4.62965500 | -2.10269700 | -1.41888400 |

**Table S36. Cartesian coordinates of imidazoline-2-ylidene 5**

|   |             |             |             |
|---|-------------|-------------|-------------|
| C | 0.00000000  | 1.02668100  | 0.00000000  |
| C | 0.76893700  | -1.23712800 | -0.03080500 |
| C | -0.76893700 | -1.23712700 | 0.03080600  |
| H | 1.15419400  | -1.67132800 | -0.96453300 |
| H | -1.15419400 | -1.67132700 | 0.96453400  |

|   |             |             |             |
|---|-------------|-------------|-------------|
| N | -1.07336800 | 0.20538600  | -0.03786800 |
| N | 1.07336800  | 0.20538600  | 0.03786700  |
| C | -2.44114400 | 0.66381900  | -0.00126900 |
| H | -3.01578300 | 0.27550900  | -0.85455300 |
| H | -2.95035000 | 0.34467300  | 0.92094000  |
| H | -2.43127700 | 1.75395900  | -0.04263100 |
| C | 2.44114400  | 0.66381900  | 0.00127000  |
| H | 3.01578200  | 0.27550800  | 0.85455400  |
| H | 2.95035100  | 0.34467300  | -0.92093900 |
| H | 2.43127700  | 1.75395900  | 0.04263200  |
| H | -1.23120400 | -1.78070400 | -0.80292500 |
| H | 1.23120400  | -1.78070400 | 0.80292600  |

**Table S37. Cartesian coordinates of imidazoline-2-ylidene 5, TS-1**

|   |             |             |             |
|---|-------------|-------------|-------------|
| C | 1.22901300  | -0.00660500 | -0.39919100 |
| C | 2.61071600  | 1.79020700  | 0.19386500  |
| C | 3.43018900  | 0.49537500  | 0.18996800  |
| H | 2.88678400  | 2.46590800  | -0.62873300 |
| H | 3.64683400  | 0.14787400  | 1.21066100  |
| N | 2.50404600  | -0.44518100 | -0.46660600 |
| N | 1.24427400  | 1.27909200  | -0.01503400 |
| C | 2.86174600  | -1.85625500 | -0.50123800 |
| H | 3.92390300  | -1.94425400 | -0.74724100 |
| H | 2.64502300  | -2.32959400 | 0.46337600  |
| H | 2.28604200  | -2.36180000 | -1.27860400 |
| C | 0.14470700  | 2.22294000  | -0.08058900 |
| H | -0.01583700 | 2.69263800  | 0.89720400  |
| H | 0.37057900  | 3.01300400  | -0.81090000 |
| H | -0.76502000 | 1.70903700  | -0.38113000 |
| H | 4.37207000  | 0.57651300  | -0.36094500 |
| H | 2.68384400  | 2.34611100  | 1.13441900  |
| C | -0.03789300 | -1.32685300 | 0.14025600  |
| H | 0.12866800  | -2.02227400 | -0.71414300 |
| O | 0.41672900  | -1.61834800 | 1.28361300  |
| C | -1.41626000 | -0.69419100 | 0.01565100  |
| C | -2.03815400 | -0.53519700 | -1.22753100 |
| C | -2.09696200 | -0.31665500 | 1.17599800  |
| C | -3.31585600 | 0.01891600  | -1.31389900 |
| H | -1.51180100 | -0.84207600 | -2.13044200 |
| C | -3.37577500 | 0.23664700  | 1.09401900  |
| H | -1.59981000 | -0.47887000 | 2.12773500  |
| C | -3.98654500 | 0.41017300  | -0.15069700 |
| H | -3.79214100 | 0.14060000  | -2.28390300 |
| H | -3.90088700 | 0.52752100  | 2.00090600  |
| H | -4.98388600 | 0.83806000  | -0.21535500 |

**Table S38. Cartesian coordinates of imidazoline-2-ylidene 5, IM-1**

|   |             |             |             |
|---|-------------|-------------|-------------|
| C | -1.18727300 | -0.11161000 | 0.14281600  |
| C | -2.62664700 | 1.70610000  | 0.18434800  |
| C | -3.43003900 | 0.39796400  | 0.21195500  |
| H | -2.71454600 | 2.26661500  | 1.12518500  |
| H | -3.86267900 | 0.17294900  | -0.77489200 |
| N | -2.39897300 | -0.59469800 | 0.54880500  |
| N | -1.25326200 | 1.22671300  | -0.00149900 |
| C | -2.74353700 | -2.00293300 | 0.38438400  |
| H | -3.77589700 | -2.14485300 | 0.71355000  |
| H | -2.62927000 | -2.30314200 | -0.66458900 |
| H | -2.10058700 | -2.62733300 | 1.00790200  |
| C | -0.21430300 | 2.05641300  | -0.59361700 |
| H | -0.66517200 | 3.00785800  | -0.88726800 |
| H | 0.60189500  | 2.25405100  | 0.10737800  |
| H | 0.17907600  | 1.55118300  | -1.47927200 |
| H | -4.23006800 | 0.39925400  | 0.95739700  |
| H | -2.92775500 | 2.36384000  | -0.63763800 |
| C | -0.05867000 | -1.00238400 | -0.27961600 |
| H | -0.14641700 | -1.97234700 | 0.26678200  |
| O | -0.49424500 | -1.01217200 | -1.56563400 |
| C | 1.37143400  | -0.52388900 | -0.00875300 |
| C | 1.83899200  | -0.26418800 | 1.28467000  |
| C | 2.25045500  | -0.41791300 | -1.08783100 |
| C | 3.16496400  | 0.11833400  | 1.49358100  |
| H | 1.16272800  | -0.35948800 | 2.13372500  |
| C | 3.58073600  | -0.04677600 | -0.88107800 |
| H | 1.85731700  | -0.63065300 | -2.07801300 |
| C | 4.04037900  | 0.22702400  | 0.40891300  |
| H | 3.51756800  | 0.32689500  | 2.50100300  |
| H | 4.25995400  | 0.03090500  | -1.72696100 |
| H | 5.07450600  | 0.52069000  | 0.57101700  |

**Table S39. Cartesian coordinates of imidazoline-2-ylidene 5, TS-2**

|   |             |             |             |
|---|-------------|-------------|-------------|
| C | 1.43929800  | -0.93383500 | 0.14898100  |
| C | 3.35331700  | -1.73144500 | -0.90090900 |
| C | 2.63925700  | -2.88997200 | -0.19449700 |
| H | 3.25324700  | -1.78732400 | -1.99435300 |
| H | 3.18061100  | -3.23150000 | 0.70043700  |
| N | 1.36211400  | -2.28179500 | 0.17629000  |
| N | 2.63710200  | -0.56433600 | -0.37487100 |
| C | 0.28245300  | -3.10063000 | 0.72002500  |
| H | 0.34593100  | -4.08399700 | 0.24344800  |
| H | 0.39024400  | -3.21779200 | 1.80419700  |
| H | -0.68963800 | -2.64620200 | 0.49005200  |
| C | 3.26094600  | 0.74822300  | -0.41269100 |
| H | 4.33346500  | 0.61864300  | -0.23090500 |
| H | 3.12355800  | 1.24301000  | -1.38166200 |
| H | 2.84680100  | 1.38784600  | 0.36315300  |
| H | 2.47754300  | -3.75181300 | -0.84787300 |



|   |             |             |             |
|---|-------------|-------------|-------------|
| H | 4.41704900  | -1.66887600 | -0.65506100 |
| C | 0.31963500  | -0.08197600 | 0.56825500  |
| H | -0.71244300 | -0.50663500 | -0.00855900 |
| O | -0.07507200 | -0.41982000 | 1.89585000  |
| C | 0.38313800  | 1.39990400  | 0.30698500  |
| C | 0.35743400  | 1.88988400  | -1.00966900 |
| C | 0.37113400  | 2.32138500  | 1.36373100  |
| C | 0.36852700  | 3.26135000  | -1.26405600 |
| H | 0.31740000  | 1.18679600  | -1.83946600 |
| C | 0.37678100  | 3.69372100  | 1.10896300  |
| H | 0.34717500  | 1.94235300  | 2.38003500  |
| C | 0.38345500  | 4.17079900  | -0.20388200 |
| C | 0.34597800  | 3.62005700  | -2.29020600 |
| H | 0.37143600  | 4.39422300  | 1.94063300  |
| H | 0.38264000  | 5.23988200  | -0.39915000 |
| H | -1.02261900 | -0.67536300 | 1.74669300  |
| O | -1.94776500 | -1.15577400 | 0.22451000  |
| C | -3.14371000 | -0.68395500 | -0.33649700 |
| C | -2.99947100 | -0.56234400 | -1.86914900 |
| H | -2.68616600 | -1.52502600 | -2.29034700 |
| H | -3.93743700 | -0.26142500 | -2.35429500 |
| H | -2.23557000 | 0.18442100  | -2.12085700 |
| C | -4.24833900 | -1.70958300 | -0.00583500 |
| H | -4.33717500 | -1.82291900 | 1.08076100  |
| H | -5.22660400 | -1.41003900 | -0.40487500 |
| H | -3.98743000 | -2.68806000 | -0.42591800 |
| C | -3.52282100 | 0.68877700  | 0.25895400  |
| H | -4.46752200 | 1.07177700  | -0.14972800 |
| H | -3.63001300 | 0.60780900  | 1.34742400  |
| H | -2.73848600 | 1.42600400  | 0.05135500  |

**Table S40. Cartesian coordinates of imidazoline-2-ylidene 5, IM-2**

|   |             |             |             |
|---|-------------|-------------|-------------|
| C | 1.18336500  | 0.13527600  | -0.11218200 |
| C | 2.62688400  | -1.68405900 | 0.17771000  |
| C | 3.46409700  | -0.39987500 | 0.02937200  |
| H | 2.65310500  | -2.06641400 | 1.20900800  |
| H | 4.04634600  | -0.39915100 | -0.90327100 |
| N | 2.46669000  | 0.67450000  | 0.02410900  |
| N | 1.28342800  | -1.25558000 | -0.20230000 |
| C | 2.72157700  | 1.84187400  | 0.85224600  |
| H | 3.73569400  | 2.20301100  | 0.65407200  |
| H | 2.01690500  | 2.62923200  | 0.58762600  |
| H | 2.63396900  | 1.62592000  | 1.93111900  |
| C | 0.48901000  | -2.04318000 | -1.12886300 |
| H | 1.13984000  | -2.72795300 | -1.68693000 |
| H | -0.28483200 | -2.63721900 | -0.62461700 |
| H | -0.01282900 | -1.37756200 | -1.83716300 |
| H | 4.16531000  | -0.27107400 | 0.86136000  |
| H | 2.97221300  | -2.48734800 | -0.48123700 |
| C | 0.01757200  | 0.84672500  | -0.21559100 |
| O | 0.13658100  | 2.20502500  | -0.55552800 |
| C | -1.34574400 | 0.34803700  | -0.03096500 |
| C | -1.65635600 | -0.75071200 | 0.80321900  |
| C | -2.42755000 | 1.03846900  | -0.62231700 |
| C | -2.97365900 | -1.14721900 | 1.00955200  |
| C | -0.84996200 | -1.27592300 | 1.30580400  |
| C | -3.74541600 | 0.64005400  | -0.40541000 |
| H | -2.21942700 | 1.87881100  | -1.27802600 |
| C | -4.03134800 | -0.45721600 | 0.40812000  |
| H | -3.17907700 | -1.99346000 | 1.66123800  |
| H | -4.55377200 | 1.18841600  | -0.88370600 |
| H | -5.05889300 | -0.76776200 | 0.57626400  |
| H | -0.48265600 | 2.69679500  | 0.01067800  |

**Table S41. Cartesian coordinates of imidazoline-2-ylidene 5, TS-3**

|   |             |             |             |
|---|-------------|-------------|-------------|
| C | 1.99479900  | -0.08417300 | -0.05194100 |
| C | 3.81142200  | 0.59847300  | -1.33626700 |
| C | 4.07524200  | -0.80612900 | -0.78994700 |
| H | 3.63172000  | 0.60174500  | -2.41962100 |
| H | 4.85761700  | -0.81855700 | -0.01772200 |
| N | 2.78694400  | -1.16520500 | -0.18847000 |
| N | 2.58896200  | 0.98768000  | -0.62030500 |
| C | 2.73763700  | -2.43773200 | 0.53183600  |
| H | 3.52411300  | -2.43276300 | 1.29836100  |
| H | 1.76950000  | -2.59903200 | 1.01478900  |
| H | 2.94209400  | -3.24719800 | -0.17688600 |
| C | 2.25316500  | 2.40536500  | -0.53610300 |
| C | 3.19568300  | 2.96035900  | -0.48333400 |
| H | 1.68693600  | 2.74452700  | -1.40929100 |
| H | 1.67200600  | 2.60864700  | 0.35906600  |
| H | 4.34898100  | -1.52606600 | -1.56637300 |
| C | 4.62009400  | 1.30254500  | -1.12096600 |
| C | 0.67845700  | -0.11704400 | 0.70169700  |
| O | 1.02963500  | -0.32529800 | 2.01683900  |
| C | -0.22222500 | 1.08351000  | 0.47778600  |
| C | -0.66524300 | 1.46455800  | -0.79827600 |
| C | -0.67751100 | 1.80645600  | 1.58690200  |
| C | -1.52064700 | 2.55275700  | -0.96295300 |
| H | -0.34754700 | 0.90040100  | -1.67164900 |
| C | -1.53636000 | 2.89532600  | 1.42357700  |
| C | -0.33865000 | 1.49719700  | 2.56962300  |
| H | -1.95791400 | 3.27681800  | 0.14904200  |
| H | -1.85724600 | 2.82742900  | -1.95958200 |
| H | -1.87712500 | 3.44658100  | 2.29674200  |
| H | -2.62804200 | 4.12307700  | 0.02204000  |
| H | 0.50847400  | -1.33703400 | 2.12010000  |
| C | -0.20288900 | -1.62943500 | 0.32064900  |
| H | 0.37216100  | -2.07814000 | -0.51398900 |
| O | -0.10281800 | -2.28537000 | 1.49129500  |

|   |             |             |             |
|---|-------------|-------------|-------------|
| C | -1.62554100 | -1.42957200 | -0.15720200 |
| C | -1.94654300 | -1.49777300 | -1.51757900 |
| C | -2.66150800 | -1.24109500 | 0.76664200  |
| C | -3.26536800 | -1.35521900 | -1.95407000 |
| H | -1.15477900 | -1.67913100 | -2.24386300 |
| C | -3.97833000 | -1.09368600 | 0.33662700  |
| H | -2.41507300 | -1.23562300 | 1.82352600  |
| C | -4.28632800 | -1.14625100 | -1.02635300 |
| H | -3.49599300 | -1.41816200 | -3.01516300 |
| H | -4.77123300 | -0.94567800 | 1.06610200  |
| H | -5.31545200 | -1.03802400 | -1.35996800 |

**Table S42. Cartesian coordinates of imidazoline-2-ylidene 5, IM-3**

|   |             |             |             |
|---|-------------|-------------|-------------|
| C | 1.97390800  | -0.34465700 | 0.07350400  |
| C | 4.19540100  | 0.35458100  | 0.15257900  |
| C | 4.10298400  | -0.94665100 | -0.65501300 |
| H | 4.47845000  | 1.21589000  | -0.46720500 |
| H | 4.59382000  | -1.79122600 | -0.15462300 |
| N | 2.65096900  | -1.19084000 | -0.72328800 |
| N | 2.82902100  | 0.51559000  | 0.64860400  |
| C | 2.19689100  | -2.37557300 | -1.45234600 |
| H | 3.06372300  | -3.03038900 | -1.57818900 |
| H | 1.43646100  | -2.89966900 | -0.87017500 |
| H | 1.82117700  | -2.11251300 | -2.44759400 |
| C | 2.52193800  | 1.52370000  | 1.65507800  |
| H | 3.38525500  | 1.60235300  | 2.32450500  |
| H | 2.33167500  | 2.50101400  | 1.19775400  |
| H | 1.65044800  | 1.17207900  | 2.21010900  |
| H | 4.52044200  | -0.85550200 | -1.66239300 |
| C | 4.90159000  | 0.28994100  | 0.98696400  |
| C | 0.44628400  | -0.28345900 | 0.48074700  |
| O | 0.44838900  | -0.51192900 | 1.80746700  |
| C | -0.07554800 | 1.09448600  | 0.01652000  |
| C | 0.16269600  | 1.59261800  | -1.27018800 |
| C | -0.84735400 | 1.85103700  | 0.90210100  |
| C | -0.36067000 | 2.82519900  | -1.66627600 |
| H | 0.76330900  | 1.01773000  | -1.97467200 |
| C | -1.37645700 | 3.08020500  | 0.50827900  |
| H | -1.01544400 | 1.44950100  | 1.89634600  |
| C | -1.13454000 | 3.57275500  | -0.77645800 |
| C | -0.16491700 | 3.20039400  | -2.66808000 |
| H | -1.97968900 | 3.65654000  | 1.20571200  |
| H | -1.54468100 | 4.53195100  | -1.08209500 |
| H | 0.21854800  | -2.20465700 | 1.37017500  |
| C | -0.42119200 | -1.43614400 | -0.20269200 |
| H | -0.16393300 | -1.54549200 | -1.26304800 |
| O | -0.05347400 | -2.61387000 | 0.49591500  |
| C | -1.91724300 | -1.18536900 | -0.11549600 |
| C | -2.65441900 | -0.86290300 | -1.25964200 |
| C | -2.59078900 | -1.29850400 | 1.10883200  |
| C | -4.03229300 | -0.64832000 | -1.19000800 |
| H | -2.14531800 | -0.77852900 | -2.21782200 |
| C | -3.96614600 | -1.08334100 | 1.18201000  |
| C | -2.02337600 | -1.54359200 | 1.99961900  |
| C | -4.69303300 | -0.75815400 | 0.03357700  |
| H | -4.58794800 | -0.40198300 | -2.09160600 |
| H | -4.47469900 | -1.17281800 | 2.13907600  |
| H | -5.76664600 | -0.59691000 | 0.09232800  |

**Table S43. Cartesian coordinates of imidazoline-2-ylidene 5, TS-4**

|   |             |             |             |
|---|-------------|-------------|-------------|
| C | -2.05915700 | -0.52397200 | -0.08501800 |
| C | -4.34326600 | 0.00887800  | -0.18239300 |
| C | -4.15165300 | -1.19386000 | 0.75386900  |
| H | -4.69003000 | 0.90544800  | 0.34800500  |
| H | -4.61675800 | -2.11010600 | 0.36772100  |
| N | -2.68147800 | -1.34891400 | 0.77373800  |
| N | -2.98152800 | 0.22429200  | -0.70045700 |
| C | -2.09953100 | -2.48060000 | 1.48482400  |
| H | -2.85527400 | -3.27094400 | 1.54972200  |
| H | -1.24703200 | -2.86482700 | 0.92289300  |
| H | -1.80378600 | -2.21093000 | 2.50667300  |
| C | -2.74756900 | 1.24573000  | -1.70977000 |
| H | -3.54205900 | 1.17856400  | -2.46208100 |
| H | -2.76308600 | 2.25142800  | -1.27110200 |
| H | -1.78567300 | 1.05123800  | -2.18400800 |
| H | -4.53787700 | -1.01674700 | 1.76337000  |
| H | -5.04057500 | -0.18914400 | -1.00399300 |
| C | -0.14862800 | -0.20057900 | -0.66182300 |
| O | -0.15149900 | -0.33750300 | -1.92436500 |
| C | 0.05802300  | 1.18897000  | -0.06544500 |
| C | -0.19601200 | 1.49042900  | 1.27917600  |
| C | 0.59249700  | 2.18453400  | -0.89020100 |
| C | 0.06992100  | 2.76210500  | 1.78595800  |
| H | -0.61909000 | 0.73067000  | 1.93261600  |
| C | 0.86186500  | 3.45758600  | -0.38571700 |
| C | 0.79501400  | 1.93550200  | -1.92697800 |
| C | 0.60078300  | 3.75116200  | 0.95359900  |
| H | -0.13710300 | 2.98247200  | 2.83041100  |
| H | 1.28014800  | 4.21990700  | -1.03845500 |
| H | 0.80994600  | 4.74213300  | 1.34838100  |
| H | 0.03602700  | -2.21383600 | -1.48923400 |
| C | 0.62117900  | -1.34045500 | 0.07671800  |
| O | 0.30175100  | -1.41527900 | 1.12080700  |
| H | 0.27615000  | -2.54452800 | -0.59126200 |
| C | 2.12481300  | -1.09499500 | 0.06040600  |
| C | 2.82289000  | -0.89403200 | 1.25536700  |
| C | 2.83796500  | -1.08238200 | -1.14654800 |
| C | 4.20377600  | -0.68463100 | 1.25361400  |
| H | 2.28169000  | -0.90484500 | 2.19942600  |

|   |            |             |             |
|---|------------|-------------|-------------|
| C | 4.21590600 | -0.87398400 | -1.15183200 |
| H | 2.30031400 | -1.22317700 | -2.07833200 |
| C | 4.90484400 | -0.67533500 | 0.04805600  |
| H | 4.72951700 | -0.53412800 | 2.19332300  |
| H | 4.75565500 | -0.86591200 | -2.09571100 |
| H | 5.98025100 | -0.51629800 | 0.04156400  |

**Table S44. Cartesian coordinates of 1,2,4-triazole-5-ylidene 6**

|   |             |             |             |
|---|-------------|-------------|-------------|
| C | -0.00256800 | -1.00637400 | 0.00000700  |
| C | 0.59217100  | 1.17756500  | -0.00000100 |
| H | 1.22488100  | 2.05444800  | -0.00001500 |
| N | -1.03808300 | -0.13521100 | 0.00001300  |
| C | -2.44344600 | -0.49458500 | -0.00000900 |
| H | -2.93741600 | -0.09375800 | 0.89026000  |
| H | -2.93738200 | -0.09377300 | -0.89030200 |
| H | -2.50157700 | -1.58291800 | -0.00000100 |
| N | 1.05509300  | -0.11819000 | -0.00000300 |
| C | 2.45188800  | -0.52291400 | -0.00000200 |
| C | 2.96738800  | -0.15066800 | -0.89171400 |
| H | 2.96730600  | -0.15098900 | 0.89189200  |
| H | 2.47172800  | -1.61276000 | -0.00019400 |
| N | -0.70889500 | 1.21172500  | 0.00000500  |

**Table S45. Cartesian coordinates of 1,2,4-triazole-5-ylidene 6, TS-1**

|   |             |             |             |
|---|-------------|-------------|-------------|
| C | 1.24507100  | -0.09244500 | 0.08655900  |
| C | 2.98927900  | 0.75741000  | -0.98390100 |
| H | 3.59711400  | 1.47199100  | -1.51979100 |
| N | 2.27812700  | -0.94614200 | 0.01167100  |
| C | 2.33793700  | -2.30779600 | 0.51794800  |
| H | 2.26912300  | -3.02179200 | -0.30782200 |
| H | 3.28525800  | -2.44968100 | 1.04159500  |
| H | 1.50580100  | -2.45736500 | 1.20635800  |
| N | 1.71050400  | 1.01195700  | -0.55993800 |
| C | 0.97683800  | 2.27305600  | -0.68360100 |
| H | 1.68616100  | 3.06823700  | -0.92216500 |
| H | 0.22760700  | 2.19663500  | -1.47545000 |
| H | 0.49088000  | 2.45098800  | 0.28049400  |
| N | 3.37733100  | -0.44281500 | -0.65414400 |
| C | -0.14915100 | 0.08542300  | 1.35450300  |
| H | 0.09585200  | -0.86109500 | 1.89803000  |
| O | 0.04625200  | 1.18699600  | 1.94134900  |
| C | -1.41409900 | -0.11376900 | 0.51482200  |
| C | -2.34717300 | 0.92316000  | 0.45501400  |
| C | -1.69465000 | -1.31936100 | -0.13802400 |
| C | -3.53498400 | 0.76741300  | -0.26369400 |
| H | -2.12494200 | 1.83705800  | 0.99787100  |
| C | -2.87854000 | -1.48066800 | -0.85602300 |
| C | -0.97879800 | -2.13904100 | -0.08526100 |
| C | -3.80253300 | -0.43290300 | -0.92367800 |
| H | -4.25614800 | 1.58056800  | -0.30176600 |
| H | -3.08467500 | -2.42161200 | -1.36071400 |
| H | -4.72746700 | -0.55741800 | -1.48116100 |

**Table S46. Cartesian coordinates of 1,2,4-triazole-5-ylidene 6, IM-1**

|   |             |             |             |
|---|-------------|-------------|-------------|
| C | 1.21393200  | -0.04785000 | 0.15334700  |
| C | 2.73467300  | 0.91021400  | -1.11175200 |
| H | 3.21052700  | 1.65144300  | -1.73694400 |
| N | 2.31810600  | -0.80329700 | 0.03330900  |
| C | 2.58807800  | -2.11644500 | 0.59896500  |
| H | 2.52103300  | -2.88205900 | -0.17910200 |
| H | 3.59539600  | -2.11082100 | 1.01883800  |
| H | 1.85709500  | -2.31870800 | 1.38144500  |
| N | 1.47655300  | 1.05705400  | -0.59856300 |
| C | 0.62633200  | 2.24884400  | -0.64494900 |
| H | 1.22569600  | 3.08768500  | -1.00388400 |
| H | -0.22251800 | 2.08066700  | -1.31100600 |
| H | 0.27957000  | 2.39676800  | 0.38425000  |
| N | 3.28437700  | -0.21680700 | -0.75443300 |
| C | 0.05306400  | -0.12694000 | 1.19018800  |
| H | 0.19430900  | -1.12672700 | 1.68841400  |
| O | 0.22783100  | 0.92961600  | 1.96529400  |
| C | -1.30192100 | -0.24281400 | 0.44333900  |
| C | -2.32249200 | 0.63360400  | 0.81279200  |
| C | -1.55332400 | -1.21093800 | -0.53556600 |
| C | -3.57936900 | 0.55012700  | 0.20913900  |
| H | -2.09381200 | 1.36478600  | 1.58308600  |
| C | -2.80516100 | -1.29373000 | -1.14698000 |
| H | -0.76734600 | -1.90936100 | -0.82467000 |
| C | -3.82312900 | -0.41098100 | -0.77426000 |
| H | -4.37074100 | 1.23455400  | 0.50640200  |
| H | -2.98903800 | -2.04637000 | -1.91027600 |
| H | -4.80016900 | -0.47597800 | -1.24667300 |

**Table S47. Cartesian coordinates of 1,2,4-triazole-5-ylidene 6, TS-2**

|   |             |             |             |
|---|-------------|-------------|-------------|
| C | -1.16612500 | -1.14578100 | -0.06976200 |
| C | -2.61126500 | -2.80055300 | -0.06241300 |
| H | -3.40120900 | -3.46012000 | -0.39100200 |
| N | -1.05909100 | -1.89857000 | 1.03802300  |
| C | -0.03525600 | -1.78620000 | 2.08024500  |
| H | -0.25108300 | -0.93507300 | 2.73118700  |
| H | -0.06938300 | -2.71241600 | 2.65276200  |
| H | 0.93284400  | -1.65497300 | 1.58046700  |
| N | -2.16869300 | -1.72951300 | -0.78916300 |
| C | -2.70411200 | -1.24255200 | -2.06262000 |
| H | -3.28808700 | -2.04310100 | -2.52017700 |
| H | -3.34115100 | -0.37183300 | -1.88664700 |

|   |             |             |             |
|---|-------------|-------------|-------------|
| H | -1.86172400 | -0.95687800 | -2.69231600 |
| N | -1.95953500 | -2.92839800 | 1.06125100  |
| C | -0.30452000 | -0.01071100 | -0.45844900 |
| H | 0.88918700  | -0.28719100 | -0.01942300 |
| O | 0.00842000  | -0.14428700 | -1.85163900 |
| C | -0.80471600 | 1.34508200  | -0.07481700 |
| C | -0.44490900 | 2.45889400  | -0.85342300 |
| C | -1.57797300 | 1.56835700  | 1.07939700  |
| C | -0.83655000 | 3.74479400  | -0.48280200 |
| H | 0.13464500  | 2.29624300  | -1.75527900 |
| C | -1.96474400 | 2.85605900  | 1.44798300  |
| H | -1.89098700 | 0.72923400  | 1.69812800  |
| C | -1.59592000 | 3.95204000  | 0.66990500  |
| H | -0.54608400 | 4.58937300  | -1.10319300 |
| H | -2.56230000 | 2.99862400  | 2.34530000  |
| H | -1.89881700 | 4.95858100  | 0.95629300  |
| H | 0.91230100  | -0.53919200 | -1.79641700 |
| O | 2.02471100  | -0.93822600 | -0.18862800 |
| C | 3.24910000  | -0.25852100 | -0.04288200 |
| C | 4.37486700  | -1.27429300 | -0.32159700 |
| H | 4.29975500  | -2.11405400 | 0.37884000  |
| H | 4.27272900  | -1.67487700 | -1.33681800 |
| H | 5.37273600  | -0.82689800 | -0.22327300 |
| C | 3.35297200  | 0.91037900  | -1.04665400 |
| H | 2.56258200  | 1.64844400  | -0.86356600 |
| H | 4.31904900  | 1.42744700  | -0.97914700 |
| H | 3.24055000  | 0.53793400  | -2.07252200 |
| C | 3.39389600  | 0.29077600  | 1.39304200  |
| H | 4.34975000  | 0.80909700  | 1.54486200  |
| H | 2.58703700  | 1.00103500  | 1.61315900  |
| H | 3.33537400  | -0.52954600 | 2.11923300  |

**Table S48. Cartesian coordinates of 1,2,4-triazole-5-ylidene 6, IM-2**

|   |             |             |             |
|---|-------------|-------------|-------------|
| C | 1.21734300  | 0.05588600  | 0.07143900  |
| C | 3.34779100  | -0.54537800 | -0.18696500 |
| H | 4.40845800  | -0.45473600 | -0.37716100 |
| N | 1.39965000  | -1.32482100 | 0.17843500  |
| C | 0.59094500  | -2.20016900 | 1.00733400  |
| H | -0.39204300 | -2.37176300 | 0.56254500  |
| H | 1.12823100  | -3.14511000 | 1.09115700  |
| H | 0.44590600  | -1.76695300 | 2.00664500  |
| N | 2.51018800  | 0.54936900  | -0.16591200 |
| C | 2.83221600  | 1.83961600  | -0.75799400 |
| H | 3.90554500  | 1.86168800  | -0.96278700 |
| H | 2.28123700  | 1.97951000  | -1.69528200 |
| H | 2.56632400  | 2.65561400  | -0.08682900 |
| N | 2.74942200  | -1.66430800 | 0.04481500  |
| C | 0.07050600  | 0.80445900  | 0.20862000  |
| O | 0.24885600  | 2.18620300  | 0.45052800  |
| C | -1.30592100 | 0.36269800  | 0.02155600  |
| C | -2.36702000 | 1.09973700  | 0.59278000  |
| C | -1.64888400 | -0.74643000 | -0.78512300 |
| C | -3.69238200 | 0.72196800  | 0.40223900  |
| H | -2.13554000 | 1.98317200  | 1.17879700  |
| C | -2.97759800 | -1.12485400 | -0.96516200 |
| C | -0.86531200 | -1.28564600 | -1.31040700 |
| C | -4.01121900 | -0.40015200 | -0.36799400 |
| H | -4.48512500 | 1.30901600  | 0.86030200  |
| H | -3.20662800 | -1.98013900 | -1.59671000 |
| H | -5.04706600 | -0.69425300 | -0.51297400 |
| H | 0.45568100  | 2.29401700  | 1.39274800  |

**Table S49. Cartesian coordinates of 1,2,4-triazole-5-ylidene 6, TS-3**

|   |             |             |             |
|---|-------------|-------------|-------------|
| C | 2.02473300  | -0.11549000 | -0.06917100 |
| C | 3.88354100  | 0.44407300  | -1.11526000 |
| H | 4.61410400  | 1.05321500  | -1.62702600 |
| N | 2.87037100  | -1.15904000 | -0.20376800 |
| C | 2.79323400  | -2.51799500 | 0.34547800  |
| H | 2.92980400  | -3.22133300 | -0.47822300 |
| H | 3.61364800  | -2.63006900 | 1.05858200  |
| H | 1.82667200  | -2.67444400 | 0.84124800  |
| N | 2.68896600  | 0.93368800  | -0.65449400 |
| C | 2.36515300  | 2.36647000  | -0.66696500 |
| H | 1.99955900  | 2.67042800  | 0.31240600  |
| H | 3.28822500  | 2.90207200  | -0.89785400 |
| H | 1.60395700  | 2.58987800  | -1.41363800 |
| N | 4.02505400  | -0.82009100 | -0.85268000 |
| C | 0.71276000  | -0.14622300 | 0.66834400  |
| O | 1.02964400  | -0.40401300 | 1.99223000  |
| C | -0.13921900 | 1.08594400  | 0.46741800  |
| C | -0.52894100 | 1.84540700  | 1.57844700  |
| C | -0.59975900 | 1.47222100  | -0.80183200 |
| C | -1.33695600 | 2.97312700  | 1.42196700  |
| H | -0.18681400 | 1.53143100  | 2.55840700  |
| C | -1.40431600 | 2.60019700  | -0.95924000 |
| C | -0.34227000 | 0.87609600  | -1.67382000 |
| H | -1.77339400 | 3.35973900  | 0.15363400  |
| H | -1.62663100 | 3.55118700  | 2.29608000  |
| H | -1.75789100 | 2.87543600  | -1.94972800 |
| H | -2.40511000 | 4.23579400  | 0.03315400  |
| H | 0.58327200  | -1.36847900 | 2.07899900  |
| C | -0.18670400 | -1.67886400 | 0.22336100  |
| C | 0.36494600  | -2.02953100 | -0.67614700 |
| H | -1.62538900 | -1.42144900 | -0.17475300 |
| C | -2.60606300 | -1.24629100 | 0.81001800  |
| C | -2.01721700 | -1.42971500 | -1.51756200 |
| C | -3.93977300 | -1.05441800 | 0.45666100  |
| H | -2.30505300 | -1.28647500 | 1.85213200  |
| C | -3.35413600 | -1.24470800 | -1.87740200 |

|   |             |             |             |
|---|-------------|-------------|-------------|
| H | -1.26908500 | -1.60063400 | -2.29099400 |
| C | -4.31954800 | -1.04970800 | -0.88933600 |
| H | -4.68980600 | -0.91678500 | 1.23197600  |
| H | -3.64186300 | -1.26341600 | -2.92609700 |
| H | -5.36200400 | -0.90757800 | -1.16334600 |
| O | -0.03169700 | -2.41131100 | 1.31872500  |

**Table S50. Cartesian coordinates of 1,2,4-triazole-5-ylidene 6, IM-3**

|   |             |             |             |
|---|-------------|-------------|-------------|
| C | -1.99818100 | -0.33161700 | -0.01348200 |
| C | -4.15847100 | 0.05222200  | -0.19293600 |
| H | -5.08236900 | 0.51095600  | -0.51270100 |
| N | -2.72611900 | -1.20106000 | 0.71166100  |
| C | -2.30750900 | -2.33550700 | 1.54003300  |
| H | -1.87236300 | -1.97927200 | 2.47740500  |
| H | -3.21215700 | -2.90375200 | 1.75200600  |
| H | -1.58849000 | -2.93055700 | 0.97417100  |
| N | -2.92773600 | 0.48190300  | -0.59458800 |
| C | -2.66516100 | 1.52842500  | -1.58790600 |
| H | -1.91310700 | 1.12213400  | -2.26884300 |
| H | -3.60325100 | 1.74867000  | -2.10114200 |
| H | -2.28422200 | 2.42574400  | -1.09702100 |
| N | -4.07890600 | -0.97240400 | 0.60680000  |
| C | -0.48372000 | -0.24525700 | -0.44518500 |
| O | -0.52386800 | -0.46469000 | -1.77065500 |
| C | 0.04089900  | 1.13275500  | 0.00609000  |
| C | 0.76970200  | 1.89897500  | -0.90742600 |
| C | -0.16051000 | 1.62838900  | 1.30020500  |
| C | 1.29463500  | 3.13621200  | -0.53287300 |
| H | 0.90713100  | 1.49830800  | -1.90660900 |
| C | 0.35922300  | 2.86845500  | 1.67675100  |
| H | -0.72936500 | 1.04678300  | 2.02499300  |
| C | 1.09073800  | 3.62582200  | 0.75950000  |
| H | 1.86430400  | 3.72083900  | -1.25115600 |
| H | 0.19286100  | 3.24214600  | 2.68418500  |
| H | 1.49704500  | 4.59117200  | 1.05018400  |
| H | -0.32444900 | -2.19333000 | -1.32515800 |
| C | 0.36371800  | -1.41398100 | 0.22788500  |
| H | 0.12150400  | -1.50603000 | 1.29403000  |
| C | 1.86241000  | -1.20134300 | 0.10748500  |
| C | 2.50551200  | -1.32467800 | -1.13215100 |
| C | 2.63104400  | -0.89760900 | 1.23597500  |
| C | 3.88317100  | -1.13832200 | -1.23523600 |
| H | 1.91478300  | -1.55559200 | -2.01160500 |
| C | 4.01115800  | -0.71163400 | 1.13600500  |
| H | 2.14583500  | -0.80654500 | 2.20584100  |
| C | 4.64178200  | -0.83163600 | -0.10238400 |
| H | 4.36831600  | -1.23560200 | -2.20351200 |
| H | 4.59182700  | -0.47982100 | 2.02548800  |
| H | 5.71685800  | -0.69252300 | -0.18472300 |
| O | -0.05913100 | -2.58791400 | -0.44622500 |

**Table S51. Cartesian coordinates of 1,2,4-triazole-5-ylidene 6, TS-4**

|   |             |             |             |
|---|-------------|-------------|-------------|
| C | -2.10610000 | -0.39004400 | 0.08096900  |
| C | -4.29236300 | -0.24367800 | -0.27947900 |
| H | -5.23002400 | 0.11423900  | -0.67899900 |
| N | -2.81106500 | -1.31832500 | 0.75078300  |
| C | -2.30523100 | -2.38372400 | 1.61378000  |
| H | -1.91020100 | -1.96338800 | 2.54287600  |
| H | -3.14897800 | -3.03480200 | 1.84043200  |
| H | -1.52661100 | -2.92774500 | 1.07574100  |
| N | -3.07424400 | 0.30289200  | -0.58764200 |
| C | -2.84947900 | 1.40372300  | -1.52718300 |
| H | -2.01704800 | 1.12446100  | -2.17533400 |
| H | -3.76178300 | 1.54942400  | -2.10946300 |
| H | -2.60785600 | 2.32060300  | -0.98514900 |
| N | -4.17301200 | -1.24573600 | 0.54411400  |
| C | -0.24890900 | -0.15101900 | -0.56572700 |
| O | -0.35386000 | -0.32550000 | -1.82061300 |
| C | 0.08014800  | 1.24078300  | -0.03835600 |
| C | 0.65558700  | 2.15735000  | -0.92457200 |
| C | -0.11254600 | 1.61875200  | 1.29647800  |
| C | 1.02694000  | 3.43020500  | -0.48788200 |
| H | 0.80622500  | 1.84930700  | -1.95427900 |
| C | 0.25658400  | 2.88970700  | 1.73563900  |
| H | -0.57202300 | 0.92130800  | 1.99322100  |
| C | 0.82812300  | 3.80062100  | 0.84297600  |
| H | 1.47488300  | 4.13184900  | -1.18714900 |
| H | 0.09552400  | 3.17148300  | 2.77323800  |
| H | 1.11537200  | 4.79168700  | 1.18463300  |
| H | -0.22687300 | -2.19011700 | -1.35959600 |
| C | 0.48528100  | -1.32656600 | 0.16115800  |
| H | 0.20352800  | -1.35963000 | 1.21895500  |
| C | 1.99733300  | -1.17274000 | 0.07318500  |
| C | 2.65903600  | -1.29544000 | -1.15644000 |
| C | 2.75293600  | -0.91279500 | 1.22091000  |
| C | 4.04391000  | -1.15843000 | -1.23109800 |
| H | 2.07987700  | -1.49057400 | -2.05311600 |
| C | 4.14069100  | -0.77478100 | 1.14948600  |
| H | 2.25172600  | -0.82020600 | 2.18228500  |
| C | 4.79036000  | -0.89781500 | -0.07854300 |
| H | 4.54386500  | -1.25592100 | -2.19164700 |
| H | 4.71195000  | -0.57704100 | 2.05306200  |
| H | 5.87085800  | -0.79488700 | -0.13853300 |
| O | 0.03411300  | -2.51656500 | -0.46610700 |

**Table S52. Cartesian coordinates of tetrazole-5-ylidene 7**

|   |             |            |             |
|---|-------------|------------|-------------|
| C | 0.00000000  | 1.02221700 | -0.00001400 |
| N | -1.02871000 | 0.13718600 | -0.00000100 |
| C | -2.44889600 | 0.44504100 | 0.00000700  |

|   |             |             |             |
|---|-------------|-------------|-------------|
| H | -2.92528800 | 0.02784200  | -0.89125700 |
| H | -2.92527000 | 0.02792700  | 0.89132300  |
| H | -2.54463200 | 1.53021800  | -0.00004200 |
| N | 1.02871000  | 0.13718600  | -0.00001300 |
| C | 2.44889600  | 0.44504100  | 0.00001200  |
| H | 2.92521300  | 0.02811000  | 0.89144300  |
| H | 2.92533300  | 0.02764800  | -0.89113700 |
| H | 2.54465100  | 1.53021700  | -0.00025700 |
| N | -0.63497200 | -1.18331100 | 0.00000500  |
| N | 0.63497000  | -1.18331200 | -0.00000500 |

**Table S53. Cartesian coordinates of tetrazole-5-ylidene 7, TS-1**

|   |             |             |             |
|---|-------------|-------------|-------------|
| C | 1.23655800  | 0.01730700  | 0.30249500  |
| N | 2.55635000  | -0.25469300 | 0.29713700  |
| C | 3.17311400  | -1.56669400 | 0.46071600  |
| H | 4.20240600  | -1.49121700 | 0.11099300  |
| H | 3.15608900  | -1.86402700 | 1.51200500  |
| H | 2.58617000  | -2.25861100 | -0.15292500 |
| N | 1.21758300  | 1.30837100  | -0.07636700 |
| C | 0.08395100  | 2.20563500  | -0.28195800 |
| H | 0.48984900  | 3.21259300  | -0.37978500 |
| H | -0.45531100 | 1.92422000  | -1.18824400 |
| H | -0.59226800 | 2.14298600  | 0.57048300  |
| N | 3.29383300  | 0.82155500  | -0.09681500 |
| N | 2.48546200  | 1.77880400  | -0.32119900 |
| C | 0.10902600  | -1.32964900 | 0.08393200  |
| H | 0.28329700  | -1.85276700 | 1.05790500  |
| O | 0.51876000  | -1.88312900 | -0.99478100 |
| C | -1.29296800 | -0.71534700 | 0.11189300  |
| C | -1.88410800 | -0.28859200 | 1.30549900  |
| C | -2.00630900 | -0.61299700 | -1.08408300 |
| C | -3.16810500 | 0.25922700  | 1.30178800  |
| H | -1.33702800 | -0.39095200 | 2.24240200  |
| C | -3.29168300 | -0.06689700 | -1.09163700 |
| H | -1.53038700 | -0.98442500 | -1.98702400 |
| C | -3.87313800 | 0.37479600  | 0.09959100  |
| H | -3.62357200 | 0.58565400  | 2.23363200  |
| H | -3.84444400 | 0.00722700  | -2.02511500 |
| H | -4.87549700 | 0.79536400  | 0.09522500  |

**Table S54. Cartesian coordinates of tetrazole-5-ylidene 7, IM-1**

|   |             |             |             |
|---|-------------|-------------|-------------|
| C | 1.21564800  | -0.09285200 | 0.14548000  |
| N | 2.49409000  | -0.43799500 | 0.41855500  |
| C | 3.03854200  | -1.78771600 | 0.44484100  |
| H | 4.12471000  | -1.69966900 | 0.45203700  |
| H | 2.70157000  | -2.32015800 | 1.33687400  |
| H | 2.69460900  | -2.29708200 | -0.46017200 |
| N | 1.29304700  | 1.24512400  | -0.01660800 |
| C | 0.26296700  | 2.16136100  | -0.48639800 |
| H | 0.73068300  | 3.14092300  | -0.58523200 |
| H | -0.10035200 | 1.80485400  | -1.45293400 |
| H | -0.56144200 | 2.19897100  | 0.22670600  |
| N | 3.31694700  | 0.64883600  | 0.32412200  |
| N | 2.59464300  | 1.66234600  | 0.06625000  |
| C | 0.13210300  | -1.06848100 | -0.31114200 |
| H | 0.27155800  | -1.99992600 | 0.29787800  |
| O | 0.52500500  | -1.12469300 | -1.58704200 |
| C | -1.29830200 | -0.58764800 | -0.02014800 |
| C | -1.76580500 | -0.37544000 | 1.28186300  |
| C | -2.16304300 | -0.40460600 | -1.09952000 |
| C | -3.08151500 | 0.03576100  | 1.50052100  |
| H | -1.10018900 | -0.53422100 | 2.13024500  |
| C | -3.48364700 | -0.00386300 | -0.88316100 |
| H | -1.76769400 | -0.58860800 | -2.09440200 |
| C | -3.94406100 | 0.22195700  | 0.41562400  |
| H | -3.43688100 | 0.20416700  | 2.51423100  |
| H | -4.15442500 | 0.13253000  | -1.72807000 |
| H | -4.97059600 | 0.53674500  | 0.58518400  |

**Table S55. Cartesian coordinates of tetrazole-5-ylidene 7, TS-2**

|   |             |             |             |
|---|-------------|-------------|-------------|
| C | -0.92866200 | -1.29106900 | 0.05796700  |
| N | -0.74600500 | -1.93005600 | -1.11571600 |
| C | 0.13174200  | -1.52999000 | -2.21852900 |
| H | 0.18243200  | -2.37491700 | -2.90453600 |
| H | -0.28252100 | -0.65423500 | -2.72267100 |
| H | 1.11041900  | -1.29801600 | -1.77859600 |
| N | -1.63954400 | -2.18085300 | 0.78119300  |
| C | -2.17234500 | -2.03906900 | 2.13416900  |
| H | -2.29508500 | -3.04120000 | 2.54508400  |
| H | -1.45428200 | -1.44966200 | 2.70460400  |
| H | -3.13761400 | -1.52744200 | 2.09664000  |
| N | -1.32789100 | -3.15744500 | -1.08804800 |
| N | -1.86637200 | -3.31084600 | 0.05962900  |
| C | -0.33188800 | -0.00355300 | 0.46394300  |
| H | 0.83584800  | -0.03446400 | -0.02998900 |
| O | 0.05410900  | -0.09454100 | 1.83635900  |
| C | -1.11102700 | 1.22886700  | 0.12115500  |
| C | -2.03687700 | 1.27912500  | -0.93488000 |
| C | -0.86691600 | 2.40639900  | 0.84755300  |
| C | -2.68474600 | 2.46967400  | -1.26459000 |
| H | -2.27336200 | 0.38071900  | -1.50204200 |
| C | -1.52127300 | 3.59253200  | 0.51922100  |
| H | -0.16922800 | 2.37193500  | 1.67676100  |
| C | -2.43038500 | 3.63495000  | -0.54017200 |
| H | -3.39831400 | 2.48121200  | -2.08475400 |
| H | -1.31871000 | 4.49064400  | 1.09744500  |

|   |             |             |             |
|---|-------------|-------------|-------------|
| H | -2.93806200 | 4.56137100  | -0.79385000 |
| O | 2.09751100  | -0.53998300 | 0.09025400  |
| C | 3.24572600  | 0.26699100  | -0.00298900 |
| H | 1.00940500  | -0.33545800 | 1.73104800  |
| C | 3.08998200  | 1.55147600  | 0.83972800  |
| H | 2.25198600  | 2.15577400  | 0.47066500  |
| H | 2.88782100  | 1.29583500  | 1.88750400  |
| H | 3.99281200  | 2.17534400  | 0.81347800  |
| C | 4.43778000  | -0.55387000 | 0.53066400  |
| H | 4.54372600  | -1.47668500 | -0.05106100 |
| H | 5.38350800  | 0.00145400  | 0.47831400  |
| H | 4.25931900  | -0.83529400 | 1.57517100  |
| C | 3.50584200  | 0.65436000  | -1.47494400 |
| H | 4.41020600  | 1.26557800  | -1.59296100 |
| H | 3.62577100  | -0.24916500 | -2.08555800 |
| H | 2.65793300  | 1.22632200  | -1.87278600 |

**Table S56. Cartesian coordinates of tetrazole-5-ylidene 7, IM-2**

|   |             |             |             |
|---|-------------|-------------|-------------|
| C | -1.21036600 | 0.06572300  | 0.06868800  |
| N | -1.39511600 | -1.31093600 | 0.20866700  |
| C | -0.53989200 | -2.24120000 | 0.92009900  |
| H | -1.12962600 | -3.13985600 | 1.10445500  |
| H | 0.35052100  | -2.49100900 | 0.33856600  |
| H | -0.21837200 | -1.80319800 | 1.87309300  |
| N | -2.51853400 | 0.50860900  | -0.13247600 |
| C | -2.94998000 | 1.74750900  | -0.75625400 |
| H | -4.04006100 | 1.72563900  | -0.78971900 |
| H | -2.59968800 | 2.60304900  | -0.18021900 |
| H | -2.54935200 | 1.82931800  | -1.77402900 |
| N | -2.73687100 | -1.61583100 | 0.10092100  |
| N | -3.38197100 | -0.55900800 | -0.13474800 |
| C | -0.07643900 | 0.82853900  | 0.17975200  |
| O | -0.26381000 | 2.21542800  | 0.36392000  |
| C | 1.30537700  | 0.38622200  | 0.01071000  |
| C | 1.65779000  | -0.68946400 | -0.83324700 |
| C | 2.35426700  | 1.09106800  | 0.63908300  |
| C | 2.98746300  | -1.07702100 | -0.99079700 |
| H | 0.88377800  | -1.19157600 | -1.40756500 |
| C | 3.68092900  | 0.70819000  | 0.46937700  |
| H | 2.11327300  | 1.95110500  | 1.25573600  |
| C | 4.00892700  | -0.38668700 | -0.33590400 |
| H | 3.22725600  | -1.90658400 | -1.65165300 |
| H | 4.46687000  | 1.26787000  | 0.97083900  |
| H | 5.04579300  | -0.68419800 | -0.46543400 |
| H | -0.52091500 | 2.35890300  | 1.28898500  |

**Table S57. Cartesian coordinates of tetrazole-5-ylidene 7, TS-3**

|   |             |             |             |
|---|-------------|-------------|-------------|
| C | -0.03603900 | 0.97427500  | 0.37790300  |
| N | -0.11354900 | 1.64238200  | -0.79706900 |
| C | 0.54559300  | 1.39550100  | -2.07719800 |
| H | -0.15694200 | 1.67897200  | -2.86089900 |
| H | 1.45955400  | 1.98841500  | -2.14847800 |
| H | 0.79566400  | 0.33964700  | -2.15195800 |
| N | -0.88849900 | 1.66010300  | 1.16883500  |
| C | -1.27597900 | 1.44526200  | 2.56637000  |
| H | -2.29735100 | 1.06037300  | 2.58759400  |
| H | -0.57921600 | 0.71394900  | 2.97302700  |
| H | -1.22343800 | 2.40650100  | 3.08006900  |
| N | -0.98433700 | 2.68324800  | -0.69985500 |
| N | -1.45401400 | 2.68998300  | 0.48208100  |
| C | 0.71739900  | -0.25815300 | 0.68817500  |
| O | 0.66126300  | -0.60486000 | 2.00772800  |
| C | 2.15615300  | -0.24933800 | 0.17050600  |
| C | 2.90457400  | 0.92953300  | 0.04373900  |
| C | 2.80322400  | -1.47586800 | -0.05250300 |
| C | 4.24691500  | 0.89404300  | -0.34233200 |
| H | 2.44853500  | 1.89193300  | 0.26877200  |
| C | 4.14273400  | -1.51215500 | -0.43558500 |
| C | 2.25339900  | -2.39739700 | 0.11394600  |
| C | 4.86859800  | -0.32850300 | -0.59276500 |
| H | 4.80631800  | 1.82182600  | -0.43287100 |
| H | 4.62443200  | -2.47163100 | -0.60532100 |
| H | 5.91264100  | -0.36070900 | -0.89259300 |
| H | 0.32294400  | -1.72353900 | 1.80147600  |
| O | -0.20340400 | -1.66014500 | -0.04791200 |
| C | -0.04934000 | -2.54168700 | 0.93992500  |
| H | 0.36062500  | -1.86927600 | -0.97381700 |
| C | -1.63914500 | -1.30540600 | -0.37433800 |
| C | -2.04026100 | -0.95429200 | -1.66988200 |
| C | -2.60883800 | -1.34236900 | 0.63892000  |
| C | -3.36802000 | -0.61789400 | -1.94506800 |
| H | -1.31332700 | -0.97655100 | -2.48052900 |
| C | -3.93419000 | -1.00385200 | 0.36925300  |
| H | -2.30316700 | -1.67465000 | 1.62624100  |
| C | -4.31810900 | -0.63214400 | -0.92302500 |
| H | -3.66253500 | -0.35816100 | -2.95900700 |
| H | -4.67551400 | -1.04419800 | 1.16400200  |
| H | -5.35243400 | -0.37411000 | -1.13435200 |

**Table S58. Cartesian coordinates of tetrazole-5-ylidene 7, IM-3**

|   |             |            |             |
|---|-------------|------------|-------------|
| C | -0.00463000 | 0.98298300 | 0.09204700  |
| N | 0.07336500  | 1.54466700 | -1.12938000 |
| C | 0.64515700  | 1.02492300 | -2.36855500 |
| H | 0.96000300  | 1.88080600 | -2.96561400 |
| H | 1.49871200  | 0.39371100 | -2.12354000 |
| H | -0.11212700 | 0.45131000 | -2.90696600 |

|   |             |             |             |
|---|-------------|-------------|-------------|
| N | -0.65364500 | 1.91183700  | 0.81074400  |
| C | -1.05359600 | 1.89334200  | 2.22298000  |
| H | -2.13678600 | 1.76727500  | 2.27271000  |
| H | -0.53198300 | 1.03545300  | 2.65729000  |
| H | -0.76143900 | 2.84696600  | 2.66535500  |
| N | -0.52300800 | 2.76794400  | -1.13715700 |
| N | -0.96286800 | 2.98941600  | 0.03834300  |
| C | 0.56145700  | -0.37811700 | 0.61319000  |
| O | 0.42091100  | -0.50751000 | 1.93268100  |
| C | 2.06615100  | -0.40897100 | 0.21303900  |
| C | 2.88012700  | 0.67468200  | 0.57917000  |
| C | 2.67465300  | -1.52871200 | -0.37083000 |
| C | 4.25150000  | 0.66371200  | 0.33252100  |
| H | 2.43696700  | 1.53053400  | 1.08403700  |
| C | 4.05225500  | -1.54539800 | -0.60966500 |
| H | 2.08297200  | -2.40876200 | -0.59721500 |
| C | 4.84405000  | -0.44887200 | -0.27015900 |
| H | 4.85909200  | 1.51844800  | 0.61930100  |
| H | 4.50558700  | -2.42627600 | -1.05737300 |
| H | 5.91378800  | -0.46382000 | -0.46115800 |
| H | 0.17980900  | -2.24969600 | 1.55639700  |
| C | -0.28582000 | -1.54924500 | -0.11585600 |
| O | -0.03765200 | -2.67864600 | 0.68268900  |
| H | 0.09742800  | -1.73426000 | -1.12810900 |
| H | -1.76856700 | -1.23073200 | -0.21457800 |
| C | -2.38662300 | -1.04756700 | -1.45767000 |
| C | -2.55152600 | -1.11707300 | 0.94603900  |
| C | -3.74582000 | -0.73636400 | -1.54957200 |
| H | -1.80527200 | -1.18053700 | -2.36919200 |
| C | -3.90765500 | -0.80435000 | 0.85745200  |
| H | -2.07941100 | -1.27653800 | 1.90929300  |
| C | -4.50966500 | -0.60872700 | -0.38954200 |
| H | -4.20779100 | -0.60739500 | -2.52518600 |
| H | -4.50253400 | -0.72473600 | 1.76431500  |
| H | -5.56867300 | -0.37336200 | -0.45522300 |

**Table S59. Cartesian coordinates of tetrazole-5-ylidene 7, TS-4**

|   |             |             |             |
|---|-------------|-------------|-------------|
| C | 0.00095200  | 1.07077400  | 0.04872600  |
| N | 0.30210200  | 1.84282300  | -1.01221200 |
| C | 0.94643800  | 1.47245000  | -2.26649000 |
| H | 1.31658400  | 2.38831000  | -2.72741900 |
| H | 1.77065100  | 0.79038600  | -2.05623300 |
| H | 0.22258600  | 0.99193600  | -2.93000100 |
| N | -0.60064500 | 1.94934300  | 0.86619800  |
| C | -1.19850700 | 1.71491000  | 2.18155400  |
| H | -2.28146900 | 1.62714300  | 2.07031700  |
| H | -0.77719000 | 0.77986200  | 2.55540000  |
| H | -0.95265500 | 2.56423500  | 2.82054000  |
| N | -0.11308200 | 3.13614700  | -0.83381400 |
| N | -0.66337000 | 3.19912900  | 0.31170800  |
| C | 0.50813400  | -0.67646800 | 0.60180300  |
| O | 0.24117600  | -0.81901800 | 1.84004200  |
| C | 2.01112300  | -0.62632600 | 0.26909100  |
| C | 2.82878800  | 0.17545400  | 1.07930600  |
| C | 2.61217600  | -1.39992300 | -0.73233700 |
| C | 4.20297900  | 0.24278800  | 0.86641600  |
| C | 2.36969600  | 0.72977400  | 1.89297600  |
| H | 3.99550100  | -1.34491300 | -0.93778900 |
| H | 2.01517100  | -2.08266600 | -1.32744100 |
| C | 4.79258200  | -0.51657100 | -0.14926600 |
| H | 4.81824900  | 0.87829200  | 1.49845600  |
| H | 4.44740000  | -1.96176100 | -1.71051600 |
| H | 5.86606600  | -0.47213000 | -0.31304400 |
| H | -0.02623300 | -2.83212000 | 1.04312600  |
| C | -0.36680600 | -1.56344100 | -0.34787300 |
| O | -0.13774200 | -2.90331700 | 0.07554500  |
| H | -0.01268800 | -1.49300500 | -1.38265000 |
| C | -1.84079600 | -1.19576900 | -0.33269400 |
| C | -2.45576200 | -0.69951300 | -1.48890000 |
| C | -2.62066700 | -1.35446700 | 0.82382500  |
| C | -3.80769600 | -0.34901900 | -1.49559800 |
| H | -1.87254400 | -0.60215700 | -2.40349500 |
| C | -3.97141700 | -1.00622900 | 0.82032200  |
| C | -2.15748200 | -1.74135700 | 1.72410200  |
| C | -4.56977300 | -0.49952700 | -0.33703600 |
| H | -4.26530000 | 0.02946700  | -2.40614000 |
| H | -4.56283000 | -1.13774300 | 1.72324300  |
| H | -5.62401900 | -0.23513600 | -0.33743400 |

**Table S60. Cartesian coordinates of perhydrobenzimidazole-2-ylidene 8**

|   |             |             |             |
|---|-------------|-------------|-------------|
| C | -0.10977100 | 0.72314400  | -0.23746400 |
| C | -0.10976200 | -0.72315100 | 0.23743000  |
| C | -1.25257500 | -1.49802900 | -0.42610300 |
| C | -2.50274700 | -0.56749200 | -0.52525500 |
| C | -2.50273900 | 0.56749000  | 0.52526900  |
| C | -1.25255800 | 1.49802000  | 0.42611200  |
| C | 2.12236400  | 0.00000100  | -0.00006200 |
| H | -0.95129100 | -1.82312900 | -1.42944000 |
| H | -2.54288400 | -0.12066300 | -1.52672200 |
| H | -3.41908000 | 1.15946900  | 0.42162100  |
| H | -0.95125000 | 1.82308600  | 1.42945400  |
| H | -1.48826200 | 2.40077900  | -0.14937100 |
| H | -2.54287400 | 0.12066200  | 1.52673700  |
| H | -3.41909400 | -1.15946300 | -0.42160300 |
| H | -1.48827400 | -2.40077000 | 0.14941300  |
| H | -0.26797000 | -0.73417700 | 1.33195600  |
| H | -0.26800900 | 0.73417800  | -1.33198500 |
| N | 1.29389500  | 1.08361100  | 0.01629000  |
| N | 1.29389200  | -1.08362800 | -0.01636400 |



|   |            |             |             |
|---|------------|-------------|-------------|
| C | 1.78094700 | 2.41541500  | -0.27638700 |
| H | 1.58338800 | 2.70118700  | -1.32180400 |
| H | 1.30727300 | 3.15993800  | 0.37510200  |
| H | 2.85912300 | 2.42250800  | -0.10848800 |
| C | 1.78097500 | -2.41538900 | 0.27647500  |
| H | 1.58351700 | -2.70101200 | 1.32195300  |
| H | 1.30723800 | -3.16000400 | -0.37486200 |
| H | 2.85913500 | -2.42251100 | 0.10847200  |

**Table S61. Cartesian coordinates of perhydrobenzimidazole-2-ylidene 8, TS-1**

|   |             |             |             |
|---|-------------|-------------|-------------|
| C | -2.37485300 | 0.67794700  | -0.34206400 |
| C | -2.08740900 | -0.77262100 | 0.01804200  |
| C | -3.00503600 | -1.71062000 | -0.76867800 |
| C | -4.41811100 | -1.05595500 | -0.87782000 |
| C | -4.70834100 | -0.04487100 | 0.25509100  |
| C | -3.68803200 | 1.13574600  | 0.29957200  |
| C | -0.09599600 | 0.40195500  | 0.02856300  |
| H | -2.59454500 | -1.88307800 | -1.77093000 |
| H | -4.50581200 | -0.54092600 | -1.84286200 |
| H | -5.72506200 | 0.34735500  | 0.14369400  |
| H | -3.51042500 | 1.43571800  | 1.33900500  |
| H | -4.08651600 | 2.00960400  | -0.22838000 |
| H | -4.69098000 | -0.57461700 | 1.21553400  |
| H | -5.18924200 | -1.83386800 | -0.87923200 |
| H | -3.06895000 | -2.68504400 | -0.27205600 |
| H | -2.26894900 | -0.90699500 | 1.09895400  |
| H | -2.46184900 | 0.76231200  | -1.44028400 |
| N | -1.10338400 | 1.30595200  | 0.05344200  |
| N | -0.62790400 | -0.82061900 | -0.18093100 |
| C | -0.90512800 | 2.73343100  | -0.11467400 |
| H | -1.01522500 | 3.03206800  | -1.16794200 |
| H | -1.63681100 | 3.28831600  | 0.48153500  |
| H | 0.09702400  | 3.00061700  | 0.22296700  |
| C | 0.10010600  | -2.05189100 | 0.08947500  |
| H | -0.37295700 | -2.87274000 | -0.45767300 |
| H | 1.12847600  | -1.94293100 | -0.25373700 |
| H | 0.11544100  | -2.26544000 | 1.16446900  |
| C | 1.45106700  | 0.57654200  | 1.24272700  |
| H | 1.32216700  | 1.67990200  | 1.34087500  |
| O | 1.12543900  | -0.16537200 | 2.20139000  |
| C | 2.67640700  | 0.25832500  | 0.39643100  |
| C | 3.48284100  | -0.82376700 | 0.75894200  |
| C | 3.06064700  | 1.06176200  | -0.68267200 |
| C | 4.64708500  | -1.11112400 | 0.04273400  |
| H | 3.17969600  | -1.41760600 | 1.61635800  |
| C | 4.22214300  | 0.78015600  | -1.39980200 |
| H | 2.43732900  | 1.90828400  | -0.96713200 |
| C | 5.01895700  | -0.31152500 | -1.03932200 |
| H | 5.26902800  | -1.95435000 | 0.33427200  |
| H | 4.50926800  | 1.40945900  | -2.23899600 |
| H | 5.92631400  | -0.53134300 | -1.59640900 |

**Table S62. Cartesian coordinates of perhydrobenzimidazole-2-ylidene 8, IM-1**

|   |             |             |             |
|---|-------------|-------------|-------------|
| C | -2.31005500 | -0.53266800 | 0.43213500  |
| C | -1.91934800 | 0.77411000  | -0.24086100 |
| C | -2.71002800 | 1.94220000  | 0.35377700  |
| C | -4.15903500 | 1.46493000  | 0.67659900  |
| C | -4.60957800 | 0.27500900  | -0.19944200 |
| C | -3.69932600 | -0.98102700 | -0.03498900 |
| C | -0.07390600 | -0.56211400 | -0.12718600 |
| H | -2.21798200 | 2.29641500  | 1.26726600  |
| H | -4.21981400 | 1.17150400  | 1.73232200  |
| H | -5.64665100 | 0.01487700  | 0.03846000  |
| H | -3.61566600 | -1.51056700 | -0.99103000 |
| H | -4.13664000 | -1.67909300 | 0.68794700  |
| H | -4.60818800 | 0.58846600  | -1.25071100 |
| H | -4.86016200 | 2.29731900  | 0.55332200  |
| H | -2.73169600 | 2.78161700  | -0.34975500 |
| H | -2.14275400 | 0.68534200  | -1.31908800 |
| H | -2.32927800 | -0.37665000 | 1.52575200  |
| N | -1.14730000 | -1.36260200 | 0.11022300  |
| N | -0.45665100 | 0.75097800  | -0.08720200 |
| C | -1.07676000 | -2.74236100 | 0.55692100  |
| H | -0.88482400 | -2.82201600 | 1.63755700  |
| H | -2.02992500 | -3.23071000 | 0.33678600  |
| H | -0.29230300 | -3.27174800 | 0.01529400  |
| C | 0.30608400  | 1.79065600  | -0.77314900 |
| H | -0.18756600 | 2.74926000  | -0.59422200 |
| H | 1.31743000  | 1.83882100  | -0.37235600 |
| H | 0.36422100  | 1.56753700  | -1.84439800 |
| C | 1.24845100  | -1.07728100 | -0.63164300 |
| H | 1.35298800  | -2.14457800 | -0.31390300 |
| O | 0.92039700  | -0.88994700 | -1.92689400 |
| C | 2.51587800  | -0.39185800 | -0.09894800 |
| C | 3.43370700  | 0.10122100  | -1.02813000 |
| C | 2.81545000  | -0.31606600 | 1.26580400  |
| C | 4.63630800  | 0.66804300  | -0.60133300 |
| H | 3.16868700  | 0.02858400  | -2.07923300 |
| C | 4.01128300  | 0.26044100  | 1.69678200  |
| H | 2.10895200  | -0.70634800 | 1.99796100  |
| C | 4.92690600  | 0.75261800  | 0.76223400  |
| H | 5.34746500  | 1.04632400  | -1.33220600 |
| H | 4.23146600  | 0.32342400  | 2.76000100  |
| H | 5.86052700  | 1.19805700  | 1.09681200  |

**Table S63. Cartesian coordinates of perhydrobenzimidazole-2-ylidene 8, TS-2**

|   |             |             |             |
|---|-------------|-------------|-------------|
| C | 2.67421400  | -0.28245400 | -0.76856100 |
| C | 2.94143200  | -0.11488700 | 0.72516100  |
| C | 4.27491000  | 0.60291700  | 0.94292100  |
| C | 5.29662700  | 0.09525800  | -0.12227000 |
| C | 4.96056300  | -1.31313400 | -0.66265000 |
| C | 3.55720900  | -1.39260800 | -1.34200000 |
| C | 0.69971600  | 0.16436000  | 0.31717300  |
| H | 4.13894300  | 1.68629200  | 0.84253500  |
| H | 5.32696600  | 0.80019000  | -0.96232600 |
| H | 5.73217700  | -1.62535800 | -1.37398800 |
| H | 3.10531900  | -2.37234300 | -1.14923500 |
| H | 3.64688400  | -1.28324500 | -2.42809100 |
| H | 5.00391900  | -2.03104500 | 0.16549900  |
| H | 6.30446900  | 0.09170300  | 0.30563700  |
| H | 4.64597300  | 0.41462100  | 1.95602900  |
| H | 2.98462300  | -1.11361800 | 1.19301000  |
| H | 2.91464000  | 0.66767700  | -1.27557000 |
| N | 1.21278900  | -0.43727300 | -0.77369900 |
| N | 1.69303100  | 0.52841000  | 1.15920000  |
| C | 0.43915200  | -0.96892800 | -1.89265300 |
| H | 0.09789200  | -0.17459300 | -2.56742500 |
| H | 1.07923500  | -1.65662600 | -2.44967300 |
| H | -0.41605600 | -1.52059000 | -1.48651400 |
| C | 1.52407900  | 1.07578900  | 2.49700600  |
| H | 2.38069900  | 1.71973400  | 2.71721800  |
| H | 0.60689900  | 1.65826400  | 2.54095000  |
| H | 1.46073900  | 0.28023500  | 3.24890700  |
| C | -0.74889400 | 0.32538500  | 0.55404800  |
| H | -1.32613500 | -0.72541300 | 0.09906900  |
| O | -1.04475100 | 0.08143800  | 1.93286000  |
| C | -1.35744300 | 1.58350900  | 0.01593200  |
| C | -2.55657300 | 2.05516200  | 0.57987700  |
| C | -0.81476900 | 2.29974600  | -1.06683600 |
| C | -3.19041300 | 3.18724500  | 0.07027500  |
| H | -2.97072000 | 1.52788400  | 1.43205200  |
| C | -1.45454900 | 3.42858700  | -1.57773300 |
| H | 0.12706500  | 1.98574400  | -1.51109300 |
| C | -2.64885600 | 3.88063100  | -1.01437600 |
| H | -4.11567300 | 3.53055000  | 0.52710500  |
| H | -1.01008200 | 3.96227100  | -2.41470500 |
| H | -3.14578400 | 4.76221900  | -1.41007800 |
| H | -1.40040600 | -0.83772000 | 1.88194600  |
| O | -1.72085400 | -1.99645400 | 0.26770000  |
| C | -3.05341700 | -2.37088300 | 0.02466900  |
| C | -3.94664700 | -1.99843400 | 1.22940100  |
| H | -3.93830400 | -0.91318800 | 1.38859600  |
| H | -4.99003500 | -2.31233100 | 1.09279900  |
| H | -3.56293900 | -2.47803200 | 2.13844100  |
| C | -3.07633700 | -3.90160400 | -0.16979000 |
| H | -4.08996500 | -4.28617100 | -0.34593800 |
| H | -2.44761800 | -4.17829600 | -1.02441200 |
| H | -2.66733800 | -4.39472100 | 0.71962300  |
| C | -3.60160400 | -1.68497500 | -1.24627800 |
| H | -2.98385000 | -1.94770400 | -2.11431500 |
| H | -4.63521900 | -1.98432200 | -1.46522900 |
| H | -3.58261200 | -0.59400200 | -1.13371200 |

**Table S64. Cartesian coordinates of perhydrobenzimidazole-2-ylidene 8, IM-2**

|   |             |             |             |
|---|-------------|-------------|-------------|
| C | 1.88638900  | -0.85530500 | -0.09605600 |
| C | 2.37798300  | 0.57714100  | 0.10489900  |
| C | 3.64112400  | 0.82383100  | -0.73050600 |
| C | 4.51064400  | -0.46733000 | -0.75352600 |
| C | 4.28626400  | -1.36342900 | 0.48308500  |
| C | 2.80661800  | -1.83113900 | 0.64425500  |
| C | 0.04918400  | 0.56931300  | 0.11049900  |
| H | 3.35830100  | 1.09955100  | -1.75348400 |
| H | 4.28245000  | -1.04576100 | -1.65745100 |
| H | 4.94700800  | -2.23572000 | 0.42911700  |
| H | 2.55082400  | -1.85948300 | 1.70998800  |
| H | 2.67672000  | -2.84747800 | 0.25509700  |
| H | 4.59022200  | -0.80856100 | 1.37951100  |
| H | 5.57118700  | -0.20145000 | -0.82482900 |
| H | 4.21227100  | 1.66250100  | -0.31616800 |
| H | 2.62536500  | 0.71243100  | 1.17697500  |
| H | 1.93207500  | -1.08344300 | -1.17598600 |
| N | 0.49357200  | -0.73656500 | 0.32051000  |
| N | 1.17964100  | 1.33166000  | -0.23440200 |
| C | -0.26509000 | -1.78796800 | 0.95336400  |
| H | -0.87038400 | -2.37996500 | 0.25227200  |
| H | 0.41909000  | -2.46215600 | 1.47648300  |
| H | -0.95130500 | -1.34773600 | 1.68351500  |
| C | 1.22840700  | 2.77700800  | -0.31759000 |
| H | 2.09500500  | 3.06156400  | -0.92311900 |
| H | 0.32563200  | 3.15379900  | -0.79335300 |
| H | 1.32952900  | 3.26464300  | 0.66768300  |
| C | -1.24727600 | 1.01297400  | 0.24687900  |
| O | -1.47110100 | 2.38967600  | 0.49872900  |
| C | -2.46936100 | 0.24753300  | 0.00274200  |
| C | -3.67967700 | 0.62351100  | 0.62679000  |
| C | -2.52568300 | -0.81884100 | -0.92236200 |
| C | -4.86547400 | -0.05926100 | 0.37512100  |
| H | -3.67544800 | 1.46897400  | 1.30724300  |
| C | -3.71291200 | -1.50748900 | -1.16332600 |
| H | -1.63187600 | -1.07873600 | -1.48277500 |
| C | -4.89238700 | -1.13876200 | -0.51317600 |
| H | -5.77842800 | 0.25277000  | 0.87752300  |
| H | -3.72076800 | -2.32154700 | -1.88481200 |
| H | -5.81986700 | -1.67039800 | -0.70826100 |
| H | -1.18380400 | 2.57240100  | 1.40569700  |

**Table S65. Cartesian coordinates of perhydrobenzimidazole-2-ylidene 8, TS-3**

|   |             |             |             |
|---|-------------|-------------|-------------|
| C | -1.44854100 | -1.71458700 | -0.53408900 |
| C | -1.99280800 | -1.13405900 | 0.75992800  |
| C | -2.88545100 | -2.15899800 | 1.46257700  |
| C | -3.72059800 | -2.91033200 | 0.37789100  |
| C | -3.89749100 | -2.09726500 | -0.92521000 |
| C | -2.54335100 | -1.71968700 | -1.60429500 |
| C | 0.16186500  | -0.39920100 | 0.46549700  |
| H | -2.27243000 | -2.87462300 | 2.02320800  |
| H | -3.23093800 | -3.86237700 | 0.13849300  |
| H | -4.51716000 | -2.66447700 | -1.62759500 |
| H | -2.62145600 | -0.72589600 | -2.05922100 |
| H | -2.29727300 | -2.43146200 | -2.39981100 |
| H | -4.45530600 | -1.18039400 | -0.69949100 |
| H | -4.70417600 | -3.16977900 | 0.78309800  |
| H | -3.54274800 | -1.65994100 | 2.18220000  |
| H | -2.58464600 | -0.23349100 | 0.52791800  |
| H | -1.11313800 | -2.75130800 | -0.35325300 |
| N | -0.25191800 | -0.88834700 | -0.72865900 |
| N | -0.75824800 | -0.67042700 | 1.41350300  |
| C | 0.49136400  | -0.96257000 | -1.97588600 |
| H | 0.95189300  | -1.95061300 | -2.10326600 |
| H | -0.19897300 | -0.77666900 | -2.80338400 |
| C | 1.27718200  | -0.21227300 | -1.99710700 |
| C | -0.81997500 | -0.19070700 | 2.79273800  |
| H | -1.18782300 | -1.00481600 | 3.42485700  |
| H | 0.17454600  | 0.12970000  | 3.09191400  |
| H | -1.51470100 | 0.65606200  | 2.85985500  |
| C | 1.41736600  | 0.38709500  | 0.64890100  |
| O | 1.64749800  | 0.80852900  | 1.93142100  |
| C | 2.66599100  | -0.32509000 | 0.11691600  |
| C | 3.78768200  | 0.44155800  | -0.23873500 |
| C | 2.78864500  | -1.72143300 | 0.11566900  |
| C | 4.97636600  | -0.17606000 | -0.62464600 |
| H | 3.72573200  | 1.52379900  | -0.16995400 |
| C | 3.97958100  | -2.34132100 | -0.27038300 |
| H | 1.95145600  | -2.33939600 | 0.43538800  |
| C | 5.07697200  | -1.56950500 | -0.65081700 |
| H | 5.83280200  | 0.43554000  | -0.89757400 |
| H | 4.05031300  | -3.42646300 | -0.26211500 |
| H | 6.00578000  | -2.04755400 | -0.95114300 |
| H | 1.84853500  | 1.92390900  | 1.63612200  |
| C | 1.19474300  | 1.96981100  | -0.17204200 |
| O | 1.81645000  | 2.77064500  | 0.70021200  |
| H | 1.70145700  | 1.84263500  | -1.14607100 |
| C | -0.26806000 | 2.31255700  | -0.39826800 |
| C | -0.87559700 | 2.20150100  | -1.65495100 |
| C | -1.04092200 | 2.77763300  | 0.67593000  |
| C | -2.22660900 | 2.51262900  | -1.83351200 |
| H | -0.27816600 | 1.89216900  | -2.51079100 |
| C | -2.39263100 | 3.07753900  | 0.50735700  |
| H | -0.55001700 | 2.92148300  | 1.63340200  |
| C | -2.99473700 | 2.93973200  | -0.74839400 |
| H | -2.67395100 | 2.43901700  | -2.82246600 |
| H | -2.97588700 | 3.44046200  | 1.35084200  |
| H | -4.04415500 | 3.18934000  | -0.88409000 |

**Table S66. Cartesian coordinates of perhydrobenzimidazole-2-ylidene 8, IM-3**

|   |             |             |             |
|---|-------------|-------------|-------------|
| C | -1.35861700 | -1.85811100 | -0.55046500 |
| C | -1.99019900 | -1.22509600 | 0.67614300  |
| C | -2.78128200 | -2.26992100 | 1.46478800  |
| C | -3.50351700 | -3.21033400 | 0.44842000  |
| C | -3.74002100 | -2.55128100 | -0.93054700 |
| C | -2.42045500 | -2.09116600 | -1.62786900 |
| C | 0.08552200  | -0.30635200 | 0.34911000  |
| H | -2.10636500 | -2.85500600 | 2.10054000  |
| H | -2.90685500 | -4.12025700 | 0.30866600  |
| H | -4.27745800 | -3.24895200 | -1.58123100 |
| H | -2.59600400 | -1.16253000 | -2.18305600 |
| H | -2.07839300 | -2.84463600 | -2.34554200 |
| H | -4.40123600 | -1.68570300 | -0.80184100 |
| H | -4.46159100 | -3.53822400 | 0.86491800  |
| H | -3.50523200 | -1.77967200 | 2.12369200  |
| H | -2.67139600 | -0.42117700 | 0.35268700  |
| H | -0.91178900 | -2.82753300 | -0.26673800 |
| N | -0.24978400 | -0.92815100 | -0.80644400 |
| N | -0.82874300 | -0.56464800 | 1.29374900  |
| C | 0.58738900  | -1.13791500 | -1.97911900 |
| H | 1.10890600  | -2.10172700 | -1.91856400 |
| H | -0.05090200 | -1.12736400 | -2.86758000 |
| H | 1.33171800  | -0.35222600 | -2.06770200 |
| C | -0.97345700 | 0.07130500  | 2.60482300  |
| H | -1.22287900 | -0.70096900 | 3.33908600  |
| H | -0.02307200 | 0.56123900  | 2.82685700  |
| H | -1.78599600 | 0.80679800  | 2.56148200  |
| C | 1.34650900  | 0.58160100  | 0.55508600  |
| O | 1.51275800  | 1.02302300  | 1.80804800  |
| C | 2.58994800  | -0.25586900 | 0.14643900  |
| C | 3.67514000  | 0.30536400  | -0.54135400 |
| C | 2.71028800  | -1.57460500 | 0.61056200  |
| C | 4.82800800  | -0.44488800 | -0.78549900 |
| H | 3.63384100  | 1.34503600  | -0.84883000 |
| C | 3.85748900  | -2.32778100 | 0.36125800  |
| C | 1.90104800  | -2.01356900 | 1.19138100  |
| H | 4.92257700  | -1.76596900 | -0.34611600 |
| H | 5.65926000  | 0.01138500  | -1.31782400 |
| H | 3.92336600  | -3.34989000 | 0.72723300  |
| H | 5.81979900  | -2.34774000 | -0.54107200 |
| H | 2.09014900  | 2.46259700  | 1.10936900  |
| C | 1.15561300  | 1.90421300  | -0.40272400 |

|   |             |            |             |
|---|-------------|------------|-------------|
| O | 2.01883400  | 2.84243600 | 0.17881600  |
| H | 1.48307500  | 1.69188300 | -1.42898100 |
| C | -0.27744600 | 2.40542500 | -0.44399800 |
| C | -1.07577400 | 2.24674500 | -1.58413300 |
| C | -0.83389600 | 3.03862400 | 0.67801500  |
| C | -2.40162400 | 2.68704100 | -1.60377700 |
| H | -0.64838500 | 1.79035700 | -2.47532200 |
| C | -2.15912800 | 3.47474800 | 0.66428700  |
| H | -0.21077000 | 3.18585200 | 1.55310600  |
| C | -2.95056900 | 3.29774000 | -0.47474200 |
| H | -2.99889400 | 2.56854300 | -2.50506200 |
| H | -2.57313200 | 3.96786700 | 1.54084500  |
| H | -3.97886000 | 3.65043200 | -0.48807200 |

**Table S67. Cartesian coordinates of perhydrobenzimidazole-2-ylidene 8, TS-4**

|   |             |             |             |
|---|-------------|-------------|-------------|
| C | -2.05651700 | -1.58441000 | -0.50722100 |
| C | -2.51341000 | -0.57941500 | 0.53654100  |
| C | -3.52921900 | -1.22133900 | 1.48467300  |
| C | -4.45270700 | -2.17105800 | 0.65762900  |
| C | -4.53824000 | -1.78716100 | -0.83758900 |
| C | -3.15126600 | -1.79584400 | -1.55583700 |
| C | -0.25442200 | -0.25840700 | 0.12259500  |
| H | -3.00882800 | -1.79211000 | 2.26297000  |
| H | -4.07974900 | -3.19977100 | 0.73795700  |
| H | -5.22632900 | -2.46754300 | -1.35080900 |
| H | -3.11395800 | -0.99436100 | -2.30334200 |
| H | -2.99614200 | -2.74238000 | -2.08549400 |
| H | -4.98206100 | -0.78730200 | -0.92083500 |
| H | -5.45907300 | -2.17973700 | 1.08994900  |
| H | -4.12019900 | -0.44922300 | 1.98907800  |
| H | -2.99000000 | 0.27418900  | 0.02294600  |
| H | -1.84775700 | -2.54725200 | -0.00736100 |
| N | -0.75774400 | -1.00230900 | -0.89220500 |
| N | -1.21711300 | -0.10178600 | 1.04856600  |
| C | 0.03604800  | -1.64680800 | -1.92423600 |
| H | 0.32770600  | -2.66425000 | -1.62923800 |
| H | -0.54526500 | -1.69925900 | -2.85051000 |
| H | 0.94155600  | -1.07192600 | -2.10680200 |
| C | -1.18309800 | 0.88240200  | 2.12596600  |
| H | -1.65425700 | 0.45636300  | 3.01798800  |
| H | -0.14395800 | 1.13427100  | 2.33483200  |
| H | -1.73211200 | 1.78656300  | 1.83108300  |
| C | 1.71075500  | 0.33366600  | 0.55530400  |
| O | 1.76346000  | 0.74249600  | 1.74464900  |
| C | 2.38713800  | -1.01132500 | 0.28621800  |
| C | 3.36180000  | -1.18910300 | -0.70388900 |
| C | 2.09101100  | -2.08469200 | 1.13876700  |
| C | 3.99652700  | -2.42554700 | -0.86062100 |
| C | 3.65712500  | -0.35293500 | -1.32947500 |
| C | 2.71255500  | -3.32032700 | 0.97499500  |
| H | 1.37084500  | -1.92998000 | 1.93736500  |
| C | 3.66767300  | -3.49722100 | -0.03167000 |
| H | 4.75697100  | -2.54421500 | -1.62870300 |
| H | 2.46199300  | -4.14470900 | 1.63851500  |
| H | 4.15918000  | -4.45860900 | -0.15734400 |
| H | 3.34936900  | 1.93040900  | 0.59527600  |
| O | 1.87547400  | 1.43037600  | -0.54093900 |
| C | 3.19860700  | 1.94922000  | -0.36702900 |
| H | 1.84944200  | 0.98524400  | -1.54115700 |
| C | 0.82862600  | 2.52778200  | -0.47569200 |
| C | -0.17780700 | 2.61024000  | -1.44580900 |
| C | 0.84926700  | 3.48512700  | 0.54840200  |
| C | -1.15008000 | 3.61149900  | -1.39285600 |
| C | -0.19736400 | 1.88453200  | -2.25610600 |
| H | -0.11891200 | 4.48775900  | 0.60422400  |
| H | 1.62395800  | 3.43844600  | 1.30514800  |
| C | -1.12397000 | 4.55450200  | -0.36420300 |
| H | -1.91728800 | 3.66233100  | -2.16184000 |
| H | -0.08678500 | 5.22250700  | 1.40506700  |
| H | -1.87290900 | 5.34144600  | -0.32316600 |

**Table S68. Cartesian coordinates of 4,5-diphenyl-imidazole-2-ylidene 9**

|   |             |             |             |
|---|-------------|-------------|-------------|
| C | -0.00027200 | 3.12453600  | -0.00006000 |
| C | -0.68630200 | 0.91219900  | -0.01658800 |
| C | 0.68601900  | 0.91230000  | 0.01654100  |
| N | -1.06418600 | 2.26257500  | -0.02884300 |
| C | -2.42777100 | 2.75679700  | -0.14834900 |
| H | -2.94662000 | 2.26982500  | -0.97996000 |
| H | -3.00353800 | 2.58844100  | 0.76781500  |
| H | -2.35752000 | 3.82876900  | -0.33334200 |
| N | 1.06374300  | 2.26270400  | 0.02874100  |
| C | 2.42729100  | 2.75700600  | 0.14827500  |
| H | 2.94582300  | 2.27086300  | 0.98057900  |
| H | 3.00342400  | 2.58771600  | -0.76747900 |
| H | 2.35695200  | 3.82915900  | 0.33218000  |
| C | 1.62625600  | -0.22191500 | 0.07871800  |
| C | 1.47445700  | -1.21466400 | 1.06246300  |
| C | 2.68626700  | -0.34560900 | -0.83667400 |
| C | 2.35397600  | -2.29396400 | 1.12841900  |
| H | 0.66256000  | -1.12941000 | 1.77821100  |
| C | 3.57059600  | -1.42122100 | -0.76383000 |
| H | 2.80483200  | 0.39538900  | -1.62209400 |
| C | 3.40824500  | -2.39944300 | 0.21893100  |
| H | 2.21950900  | -3.05040100 | 1.89715700  |
| H | 4.38245600  | -1.49925600 | -1.48224300 |
| H | 4.09681300  | -3.23829100 | 0.27428500  |
| C | -1.62628900 | -0.22221200 | -0.07871100 |
| C | -2.68692900 | -0.34559000 | 0.83600200  |
| C | -1.47359200 | -1.21554300 | -1.06174200 |

|   |             |             |             |
|---|-------------|-------------|-------------|
| C | -3.57096100 | -1.42144800 | 0.76319300  |
| H | -2.80625100 | 0.39585400  | 1.62088000  |
| C | -2.35281100 | -2.29508500 | -1.12764500 |
| H | -0.66124500 | -1.13054200 | -1.77700400 |
| C | -3.40769800 | -2.40025000 | -0.21883600 |
| H | -4.38331400 | -1.49921300 | 1.48107900  |
| H | -2.21763200 | -3.05195500 | -1.89583200 |
| H | -4.09603800 | -3.23928600 | -0.27415800 |

**Table S69. Cartesian coordinates of 4,5-diphenyl-imidazole-2-ylidene 9, TS-1**

|   |             |             |             |
|---|-------------|-------------|-------------|
| C | -1.14431600 | -0.48734700 | 0.48323200  |
| C | 0.83291900  | 0.59566200  | 0.18134100  |
| C | 1.09299800  | -0.75161200 | 0.13696700  |
| N | -0.54413000 | 0.72122000  | 0.40279100  |
| C | -1.26867100 | 1.96910400  | 0.66287800  |
| H | -0.56401300 | 2.72142500  | 1.01834800  |
| H | -1.75584500 | 2.32847600  | -0.24814700 |
| H | -2.01562100 | 1.74945400  | 1.43068100  |
| N | -0.14323600 | -1.38789000 | 0.32562500  |
| C | -0.35462800 | -2.83111800 | 0.29014200  |
| H | 0.21414900  | -3.27004000 | -0.53281800 |
| H | -0.04177400 | -3.30000100 | 1.22789600  |
| H | -1.41642800 | -3.01970400 | 0.13920600  |
| C | 2.35788600  | -1.46667800 | -0.11511200 |
| C | 3.11495900  | -1.17730600 | -1.26323000 |
| C | 2.83731000  | -2.43894500 | 0.77974200  |
| C | 4.31583000  | -1.84109000 | -1.50785000 |
| H | 2.75271400  | -0.43027800 | -1.96283900 |
| C | 4.03452100  | -3.10810700 | 0.52805300  |
| H | 2.28004600  | -2.65526200 | 1.68693000  |
| C | 4.77752300  | -2.81137700 | -0.61606500 |
| H | 4.88820000  | -1.60471800 | -2.40072600 |
| H | 4.39123600  | -3.85494500 | 1.23214500  |
| H | 5.71149600  | -3.33150100 | -0.81023300 |
| C | 1.75898400  | 1.73402300  | 0.04623100  |
| C | 1.49331700  | 2.78437300  | -0.84946500 |
| C | 2.94028100  | 1.77805300  | 0.80545300  |
| C | 2.38364400  | 3.84958500  | -0.97816700 |
| H | 0.59273400  | 2.75756200  | -1.45628700 |
| C | 3.83235200  | 2.84005600  | 0.66840200  |
| C | 3.15094900  | 0.97717400  | 1.50725800  |
| C | 3.55621900  | 3.88032500  | -0.22108500 |
| H | 2.16329900  | 4.65278300  | -1.67604800 |
| H | 4.74063800  | 2.85872600  | 1.26448700  |
| H | 4.24989000  | 4.71037800  | -0.32309500 |
| C | -2.86852400 | -0.68620500 | 1.42105200  |
| H | -2.73396200 | -1.78391400 | 1.56625100  |
| O | -2.82553200 | 0.07027800  | 2.42456700  |
| C | -3.88041500 | -0.41416500 | 0.30794000  |
| C | -4.77029000 | 0.65200300  | 0.45934800  |
| C | -3.99705500 | -1.23708500 | -0.81806700 |
| C | -5.74539400 | 0.90709200  | -0.50769200 |
| H | -4.68664800 | 1.25740600  | 1.35693100  |
| C | -4.96968700 | -0.98968700 | -1.78530500 |
| C | -3.31617800 | -2.07799200 | -0.94327100 |
| H | -5.84672600 | 0.08916100  | -1.63405200 |
| H | -6.43279400 | 1.73987600  | -0.37752200 |
| H | -5.04726200 | -1.63622600 | -2.65640700 |
| H | -6.60721800 | 0.28349200  | -2.38633600 |

**Table S70. Cartesian coordinates of 4,5-diphenyl-imidazole-2-ylidene 9, IM-1**

|   |             |             |             |
|---|-------------|-------------|-------------|
| C | 1.14329800  | -0.67911700 | -0.50535600 |
| C | -0.72483400 | 0.54516100  | -0.22368900 |
| C | -1.07795900 | -0.77701300 | -0.10712000 |
| N | 0.64924500  | 0.57772100  | -0.46613200 |
| C | 1.43799800  | 1.73580200  | -0.90367700 |
| H | 0.75647000  | 2.50881400  | -1.25830100 |
| H | 2.04287000  | 2.12217100  | -0.07964800 |
| H | 2.07791700  | 1.35632300  | -1.71047300 |
| N | 0.10459500  | -1.51468900 | -0.27669300 |
| C | 0.23693500  | -2.96623500 | -0.15482300 |
| H | -0.67400600 | -3.36293800 | 0.29185700  |
| H | 0.38984400  | -3.41977000 | -1.13823500 |
| H | 1.08623400  | -3.20814200 | 0.48514200  |
| C | -2.39329000 | -1.38123800 | 0.17042500  |
| C | -3.13541000 | -0.97711400 | 1.29300800  |
| C | -2.93844200 | -2.35581100 | -0.68443200 |
| C | -4.38795200 | -1.53109000 | 1.55128900  |
| H | -2.72203300 | -0.22791200 | 1.96117700  |
| C | -4.18753600 | -2.91520800 | -0.41750100 |
| H | -2.38838300 | -2.66055600 | -1.57072100 |
| C | -4.91626300 | -2.50410300 | 0.70017800  |
| H | -4.94875900 | -1.20716300 | 2.42369700  |
| H | -4.59509500 | -3.66546700 | -1.08947000 |
| H | -5.89074600 | -2.93824700 | 0.90580800  |
| C | -1.56280200 | 1.75364200  | -0.13138800 |
| C | -1.19321000 | 2.82465700  | 0.70031000  |
| C | -2.75584100 | 1.84793400  | -0.86640000 |
| C | -1.99653100 | 3.96038000  | 0.79149700  |
| H | -0.28036800 | 2.75973700  | 1.28558300  |
| C | -3.56030800 | 2.98174200  | -0.76674000 |
| C | -3.04416000 | 1.03157500  | -1.52106100 |
| C | -3.18282300 | 4.04186900  | 0.05981100  |
| H | -1.69733700 | 4.77940300  | 1.43974000  |
| H | -4.47895600 | 3.04042200  | -1.34388700 |
| H | -3.80838800 | 4.92724400  | 0.13221800  |
| C | 2.54035300  | -1.05473800 | -1.07547300 |
| H | 2.58142500  | -2.17496900 | -0.98266900 |
| O | 2.55512300  | -0.59163200 | -2.31856500 |

|   |            |             |             |
|---|------------|-------------|-------------|
| C | 3.65915600 | -0.54629100 | -0.12640900 |
| C | 4.74286000 | 0.11723100  | -0.70308600 |
| C | 3.65673500 | -0.77151700 | 1.25489300  |
| C | 5.80920400 | 0.55324600  | 0.08629500  |
| H | 4.71116800 | 0.27159300  | -1.77815500 |
| C | 4.71642600 | -0.33175900 | 2.05025300  |
| H | 2.81826400 | -1.29205100 | 1.71929400  |
| C | 5.79833000 | 0.33265800  | 1.46549700  |
| H | 6.65087100 | 1.06655900  | -0.37374100 |
| H | 4.70043300 | -0.50728500 | 3.12376100  |
| H | 6.62630600 | 0.67397200  | 2.08220100  |

**Table S71. Cartesien coordinates of 4,5-diphenyl-imidazole-2-ylidene 9, TS-2**

|   |             |             |             |
|---|-------------|-------------|-------------|
| C | -0.45022300 | -0.41695800 | -0.21892400 |
| C | 1.78667100  | -0.63221900 | -0.39138300 |
| C | 1.52697400  | 0.54418400  | 0.27111500  |
| N | 0.54949300  | -1.20901900 | -0.67918100 |
| C | 0.32317000  | -2.47980000 | -1.37459500 |
| H | 1.15333000  | -2.65946500 | -2.05813600 |
| H | 0.26043500  | -3.29859400 | -0.65190200 |
| H | -0.61572300 | -2.39217000 | -1.92044800 |
| N | 0.13914200  | 0.65393000  | 0.36346600  |
| C | -0.61804300 | 1.74934200  | 0.98719000  |
| H | 0.08528100  | 2.51612900  | 1.30630500  |
| H | -1.33020800 | 2.13751500  | 0.25011800  |
| H | -1.16084800 | 1.37143300  | 1.85695400  |
| C | 2.47716700  | 1.54173800  | 0.80427800  |
| C | 3.42082800  | 1.16591800  | 1.77282800  |
| C | 2.47240900  | 2.86758100  | 0.33811800  |
| C | 4.33617700  | 2.09482100  | 2.26614700  |
| H | 3.43074600  | 0.14324500  | 2.13763300  |
| C | 3.38441600  | 3.79608700  | 0.83903500  |
| H | 1.76104800  | 3.16524700  | -0.42754900 |
| C | 4.31786400  | 3.41197500  | 1.80379100  |
| H | 5.06042200  | 1.79006100  | 3.01642900  |
| H | 3.36950500  | 4.81757500  | 0.46944800  |
| H | 5.02902700  | 4.13585400  | 2.19195800  |
| C | 3.08307100  | -1.21712800 | -0.78469400 |
| C | 3.42686500  | -2.53169400 | -0.42613600 |
| C | 4.00805600  | -0.45010000 | -1.51170900 |
| C | 4.66076300  | -3.06663500 | -0.79362600 |
| H | 2.73198700  | -3.13044600 | 0.15579100  |
| C | 5.24401700  | -0.98509700 | -1.87069000 |
| H | 3.75034500  | 0.56501900  | -1.79697300 |
| C | 5.57258200  | -2.29495000 | -1.51623900 |
| H | 4.91219400  | -4.08417700 | -0.50769400 |
| H | 5.94810400  | -0.37957100 | -2.43451700 |
| H | 6.53463700  | -2.71206400 | -1.80055500 |
| C | -1.91332600 | -0.61024500 | -0.37658700 |
| H | -2.47333300 | 0.60788300  | -0.53409800 |
| O | -2.19055200 | -1.04113800 | -1.72074900 |
| C | -2.56127100 | -1.46016500 | 0.66112200  |
| C | -3.73678200 | -2.17055900 | 0.34951600  |
| C | -2.08068000 | -1.54438700 | 1.98345000  |
| C | -4.40446100 | -2.91514500 | 1.32023600  |
| H | -4.10525200 | -2.13896700 | -0.66984200 |
| C | -2.75407500 | -2.28692400 | 2.95242800  |
| H | -1.16037600 | -1.03329300 | 2.26099300  |
| C | -3.92369600 | -2.97797700 | 2.63026600  |
| H | -5.30893000 | -3.45459300 | 1.04791900  |
| H | -2.35599900 | -2.33097400 | 3.96384400  |
| H | -4.44717200 | -3.55883500 | 3.38482100  |
| H | -2.48971300 | -0.20057400 | -2.13683100 |
| O | -2.78250000 | 1.59721800  | -1.26938400 |
| C | -4.10063900 | 2.09325200  | -1.20129100 |
| C | -4.14559900 | 3.37975000  | -2.04823600 |
| H | -5.14429800 | 3.83579700  | -2.05794000 |
| H | -3.43323200 | 4.11286100  | -1.65199800 |
| H | -3.85596100 | 3.15572200  | -3.08135300 |
| C | -5.10062700 | 1.06611200  | -1.77411000 |
| H | -5.08630600 | 0.14422300  | -1.18116500 |
| H | -6.12941600 | 1.44954400  | -1.77820100 |
| H | -4.82911800 | 0.81294000  | -2.80641300 |
| C | -4.48579000 | 2.42001100  | 0.25789000  |
| H | -3.79231400 | 3.15975700  | 0.67701200  |
| H | -5.50183500 | 2.82876100  | 0.33456300  |
| H | -4.43796700 | 1.51642400  | 0.87776000  |

**Table S72. Cartesien coordinates of 4,5-diphenyl-imidazole-2-ylidene 9, IM-2**

|   |             |             |             |
|---|-------------|-------------|-------------|
| C | 1.13325400  | 0.75260200  | -0.16307500 |
| C | -1.14647300 | 0.75917800  | -0.00596800 |
| C | -0.74896400 | -0.53770600 | -0.12579200 |
| N | 0.00507600  | 1.58899500  | -0.04704800 |
| C | 0.09067600  | 2.75475600  | 0.84407400  |
| C | -0.81802900 | 3.34978600  | 0.74973300  |
| H | 0.20600900  | 2.44159400  | 1.89079500  |
| H | 0.95535600  | 3.35377800  | 0.56107500  |
| N | 0.66289300  | -0.56789800 | -0.21579300 |
| C | 1.37810900  | -1.58509800 | -0.97826200 |
| H | 0.66514200  | -2.31578800 | -1.36079500 |
| H | 1.90192500  | -1.10637800 | -1.81444300 |
| H | 2.12690000  | -2.09976400 | -0.36862600 |
| C | -1.54957000 | -1.77064100 | -0.17609700 |
| C | -1.18343700 | -2.88965600 | 0.59477000  |
| C | -2.69210300 | -1.86146100 | -0.99030600 |
| C | -1.94371000 | -4.05694500 | 0.56068600  |
| H | -0.30455800 | -2.83212700 | 1.23096300  |
| C | -3.45391700 | -3.02815200 | -1.01604100 |
| H | -2.97560900 | -1.01303400 | -1.60491700 |

|   |             |             |             |
|---|-------------|-------------|-------------|
| C | -3.08373500 | -4.13071500 | -0.24292500 |
| H | -1.64742100 | -4.90880400 | 1.16705000  |
| H | -4.33402800 | -3.07938900 | -1.65155100 |
| H | -3.67583500 | -5.04137400 | -0.26978000 |
| C | -2.49526700 | 1.32507000  | 0.13743200  |
| C | -3.42667900 | 0.77194200  | 1.03379600  |
| C | -2.88061700 | 2.44575300  | -0.62202800 |
| C | -4.70613600 | 1.31113100  | 1.15153000  |
| H | -3.13776500 | -0.08015900 | 1.64085100  |
| C | -4.15821900 | 2.98791700  | -0.49483400 |
| H | -2.17350100 | 2.87820100  | -1.32478400 |
| C | -5.07793900 | 2.42200700  | 0.39070800  |
| H | -5.41143900 | 0.86883800  | 1.85018100  |
| H | -4.43755400 | 3.85100300  | -1.09353400 |
| H | -6.07372000 | 2.84526400  | 0.49001900  |
| C | 2.42546400  | 1.19354100  | -0.32658100 |
| O | 2.61097400  | 2.53817800  | -0.70025000 |
| C | 3.66019400  | 0.47552000  | -0.03766400 |
| C | 4.87089200  | 0.87486200  | -0.64626000 |
| C | 3.72036100  | -0.57929000 | 0.90077400  |
| C | 6.06680800  | 0.22397600  | -0.36083800 |
| H | 4.85472400  | 1.70664500  | -1.34225400 |
| C | 4.91961800  | -1.23262100 | 1.17499900  |
| H | 2.82143800  | -0.85845800 | 1.44380900  |
| C | 6.10262300  | -0.84162500 | 0.54376100  |
| H | 6.98145300  | 0.55061100  | -0.85040200 |
| H | 4.93298400  | -2.03866200 | 1.90514900  |
| H | 7.03853300  | -1.34800800 | 0.76352700  |
| H | 2.01401600  | 2.71706300  | -1.44533900 |

**Table S73. Cartesian coordinates of 4,5-diphenyl-imidazole-2-ylidene 9, TS-3**

|   |             |             |             |
|---|-------------|-------------|-------------|
| C | -0.07622200 | -0.56444500 | 0.28520700  |
| C | 2.16929200  | -0.72501200 | 0.13566000  |
| C | 1.84572300  | 0.60256400  | 0.05510900  |
| N | 0.96995100  | -1.42637200 | 0.29831900  |
| C | 0.90909300  | -2.86778000 | 0.60203900  |
| H | 0.69193200  | -3.43547400 | -0.30307600 |
| H | 1.87966900  | -3.15522000 | 1.00749400  |
| H | 0.11300900  | -3.05009800 | 1.31579400  |
| N | 0.45432100  | 0.68035300  | 0.15250500  |
| C | -0.29294200 | 1.93034900  | 0.00616900  |
| H | -0.07102400 | 2.37686900  | -0.96608000 |
| H | -1.35486900 | 1.72431500  | 0.08698500  |
| H | -0.00845600 | 2.62875600  | 0.79566600  |
| C | 2.71335900  | 1.78058400  | -0.15267300 |
| C | 2.80542800  | 2.79361300  | 0.81610600  |
| C | 3.47256400  | 1.89349900  | -1.32786400 |
| C | 3.63032900  | 3.89829700  | 0.60849500  |
| H | 2.24341900  | 2.70531600  | 1.74222700  |
| C | 4.30197200  | 2.99614600  | -1.52982700 |
| H | 3.40668900  | 1.11411500  | -2.08095800 |
| C | 4.37974400  | 4.00222800  | -0.56521700 |
| H | 3.69343500  | 4.67340300  | 1.36716800  |
| H | 4.88357800  | 3.07084200  | -2.44432000 |
| H | 5.02351500  | 4.86256800  | -0.72550200 |
| C | 3.49758700  | -1.36129400 | 0.06438700  |
| C | 4.53999300  | -0.91445200 | 0.89223600  |
| C | 3.75248300  | -2.39815800 | -0.84980700 |
| C | 5.80637600  | -1.49103600 | 0.80755100  |
| H | 4.35120500  | -0.11690200 | 1.60414000  |
| C | 5.01813100  | -2.97678700 | -0.92646300 |
| H | 2.96045500  | -2.73952000 | -1.51028200 |
| C | 6.04817600  | -2.52493800 | -0.09878500 |
| H | 6.60272300  | -1.13628600 | 1.45585200  |
| H | 5.20084700  | -3.77632300 | -1.63890200 |
| H | 7.03448200  | -2.97631500 | -0.16071700 |
| C | -1.53427200 | -0.96379500 | 0.23051600  |
| O | -1.65185900 | -2.31629600 | 0.09823400  |
| C | -2.38830200 | -0.42503100 | 1.36151900  |
| C | -3.70272300 | -0.91215400 | 1.47525700  |
| C | -1.93510700 | 0.45575700  | 2.35584000  |
| C | -4.53946700 | -0.49301500 | 2.50444000  |
| H | -4.05075900 | -1.63738200 | 0.75096700  |
| C | -2.77269400 | 0.87497700  | 3.39369300  |
| H | -0.90500900 | 0.80132100  | 2.35626900  |
| C | -4.08356200 | 0.41125100  | 3.46845400  |
| H | -5.55377000 | -0.88040200 | 2.55893500  |
| H | -2.38771600 | 1.55360800  | 4.15138700  |
| H | -4.73752700 | 0.73498800  | 4.27394100  |
| H | -1.73075300 | -2.32990800 | -1.06261400 |
| C | -2.00800900 | -0.48587700 | -1.51688900 |
| H | -1.29970800 | 0.31700100  | -1.78958900 |
| O | -1.79032000 | -1.65223500 | -2.12025700 |
| C | -3.42919400 | 0.03120400  | -1.59582900 |
| C | -4.46777000 | -0.86932600 | -1.87303900 |
| C | -3.74962700 | 1.38764600  | -1.45337400 |
| C | -5.78746700 | -0.43231900 | -1.97101900 |
| H | -4.20511000 | -1.90998300 | -2.03366000 |
| C | -5.06928400 | 1.83134200  | -1.55208100 |
| H | -2.95944900 | 2.11722000  | -1.28873400 |
| C | -6.09625700 | 0.92052400  | -1.80450900 |
| H | -6.57856100 | -1.14662300 | -2.18807000 |
| H | -5.29396300 | 2.88970500  | -1.44129800 |
| H | -7.12485500 | 1.26342700  | -1.88442700 |

**Table S74. Cartesian coordinates of 4,5-diphenyl-imidazole-2-ylidene 9, IM-3**

|   |             |             |             |
|---|-------------|-------------|-------------|
| C | -0.10537400 | 0.09905900  | -0.32809400 |
| C | 2.05394600  | -0.55785000 | -0.28263200 |
| C | 2.02668700  | 0.78532700  | -0.02050200 |

|   |             |             |             |
|---|-------------|-------------|-------------|
| N | 0.73351000  | -0.95612600 | -0.46891800 |
| C | 0.29665300  | -2.32696700 | -0.76569000 |
| H | 1.13868600  | -2.87612400 | -1.18313600 |
| H | -0.04311700 | -2.81552900 | 0.15025300  |
| H | -0.52642700 | -2.23695800 | -1.47845900 |
| N | 0.68033400  | 1.17605400  | -0.06403200 |
| C | 0.26010700  | 2.58415400  | 0.00059500  |
| H | -0.46861000 | 2.76242800  | -0.79239600 |
| H | -0.16513500 | 2.81666200  | 0.98073500  |
| H | 1.14273300  | 3.20227500  | -0.15586500 |
| C | 3.15240100  | 1.69852100  | 0.25618500  |
| C | 3.18595000  | 2.47578000  | 1.42690200  |
| C | 4.23224900  | 1.77745400  | -0.63791100 |
| C | 4.26725700  | 3.31481400  | 1.69073700  |
| H | 2.36706100  | 2.41118800  | 2.13826900  |
| C | 5.31653500  | 2.61107200  | -0.36732100 |
| H | 4.21520400  | 1.18405200  | -1.54670600 |
| C | 5.33595800  | 3.38429100  | 0.79464500  |
| H | 4.27801700  | 3.90845900  | 2.60063600  |
| H | 6.14362700  | 2.66132400  | -1.06997200 |
| H | 6.17935600  | 4.03708400  | 1.00177500  |
| C | 3.21628400  | -1.47020600 | -0.34774100 |
| C | 3.98203300  | -1.71514200 | 0.80173700  |
| C | 3.58665300  | -2.08437100 | -1.55564900 |
| C | 5.09120100  | -2.55879300 | 0.74613100  |
| H | 3.70258900  | -1.24145900 | 1.73807500  |
| C | 4.69186000  | -2.93317300 | -1.60694100 |
| H | 3.01302500  | -1.88486300 | -2.45693500 |
| C | 5.44599900  | -3.17254500 | -0.45627500 |
| H | 5.67518200  | -2.73968200 | 1.64424900  |
| H | 4.96741300  | -3.40158600 | -2.54769200 |
| H | 6.30792400  | -3.83269700 | -0.49780100 |
| O | -1.65847300 | -0.09221700 | -0.59976500 |
| C | -1.75067500 | -0.58424000 | -1.84748100 |
| C | -2.19140200 | -0.99983100 | 0.53348400  |
| C | -3.02826500 | -2.06670100 | 0.19499400  |
| C | -1.90014200 | -0.77110400 | 1.88389500  |
| C | -3.56724500 | -2.88753700 | 1.18586200  |
| H | -3.23599900 | -2.22762800 | -0.85788200 |
| C | -2.43440200 | -1.59284200 | 2.87863000  |
| H | -1.24808500 | 0.05400500  | 2.16831200  |
| C | -3.27174900 | -2.65480700 | 2.53136000  |
| H | -4.22008100 | -3.71175000 | 0.90829000  |
| H | -2.19695500 | -1.40383400 | 3.92299400  |
| H | -3.68931900 | -3.29600700 | 3.30356000  |
| H | -1.86283000 | 1.11503400  | -2.34014900 |
| C | -2.44454400 | 1.29627200  | -0.58008100 |
| C | -2.13631300 | 1.91767300  | 0.26826600  |
| O | -2.05959700 | 1.92995900  | -1.79004900 |
| C | -3.95207200 | 1.12503300  | -0.49737000 |
| C | -4.67541400 | 0.60315700  | -1.57926500 |
| C | -4.65024700 | 1.51387400  | 0.65055600  |
| C | -6.06087400 | 0.46876800  | -1.50488200 |
| H | -4.13681700 | 0.29026800  | -2.46648400 |
| C | -6.03825900 | 1.38192200  | 0.72776400  |
| H | -4.10284900 | 1.92751400  | 1.49549400  |
| C | -6.74872700 | 0.85838300  | -0.35231600 |
| H | -6.60795200 | 0.06016500  | -2.35131700 |
| H | -6.56241000 | 1.69372900  | 1.62801500  |
| H | -7.83010100 | 0.75822800  | -0.29948300 |

**Table S75. Cartesian coordinates of 4,5-diphenyl-imidazole-2-ylidene 9, TS-4**

|   |             |             |             |
|---|-------------|-------------|-------------|
| C | 0.01327500  | -0.08574200 | -0.18223200 |
| C | -2.17519800 | 0.54098600  | -0.25047300 |
| C | -2.14187000 | -0.79635400 | 0.04592200  |
| N | -0.84263500 | 0.94572600  | -0.38560800 |
| C | -0.40544600 | 2.32529700  | -0.62589900 |
| H | -1.21402800 | 2.87754700  | -1.10256600 |
| H | -0.14962600 | 2.80884200  | 0.32074600  |
| H | 0.47004700  | 2.28950900  | -1.27477400 |
| N | -0.78592800 | -1.15566300 | 0.07077400  |
| C | -0.29835600 | -2.53309400 | 0.19117700  |
| H | 0.45778300  | -2.69789700 | -0.57810500 |
| H | 0.12298700  | -2.71047000 | 1.18579100  |
| H | -1.13427400 | -3.21525600 | 0.03865400  |
| C | -3.26000100 | -1.72638700 | 0.29047400  |
| C | -3.30741600 | -2.51332100 | 1.45453000  |
| C | -4.31625000 | -1.82357200 | -0.63045600 |
| C | -4.37666300 | -3.37734000 | 1.68602500  |
| C | -2.50893100 | -2.43498600 | 2.18734500  |
| H | -5.38872000 | -2.68171500 | -0.39242800 |
| H | -4.28874200 | -1.22454700 | -1.53531700 |
| C | -5.42119600 | -3.46383100 | 0.76357100  |
| H | -4.39710900 | -3.97717600 | 2.59186000  |
| H | -6.19675400 | -2.74457400 | -1.11614900 |
| H | -6.25535600 | -4.13593800 | 0.94512200  |
| C | -3.34164100 | 1.43697900  | -0.39500100 |
| C | -4.19981500 | 1.66084600  | 0.69279600  |
| C | -3.62581300 | 2.06338300  | -1.62049400 |
| C | -5.31176900 | 2.49192600  | 0.55989900  |
| H | -3.98857200 | 1.17921700  | 1.64284100  |
| C | -4.73333600 | 2.90101800  | -1.74889100 |
| H | -2.98291100 | 1.87958500  | -2.47730600 |
| H | -5.57885500 | 3.11784600  | -0.65896500 |
| C | -5.96668200 | 2.65450300  | 1.41156000  |
| H | -4.93980700 | 3.37762700  | -2.70329700 |
| H | -6.44283800 | 3.76888100  | -0.76036700 |
| C | 1.98199400  | 0.27190800  | -0.61341100 |
| O | 1.95750300  | 0.78364800  | -1.77265700 |
| C | 2.37088300  | 1.14105200  | 0.57583700  |
| C | 3.06361100  | 2.32938500  | 0.31973700  |
| C | 2.13077100  | 0.77265700  | 1.90584700  |



|   |            |             |             |
|---|------------|-------------|-------------|
| C | 3.50171900 | 3.13773800  | 1.36992200  |
| H | 3.25059800 | 2.60102000  | -0.71427300 |
| C | 2.56679500 | 1.57791100  | 2.95729600  |
| H | 1.58084800 | -0.14063900 | 2.11981800  |
| C | 3.25463700 | 2.76520100  | 2.69195900  |
| H | 4.03988900 | 4.05774900  | 1.15521500  |
| H | 2.36750900 | 1.28162800  | 3.98429500  |
| H | 3.59437800 | 3.39379000  | 3.51116300  |
| H | 1.87327100 | -1.06002700 | -2.33996900 |
| C | 2.57299800 | -1.17343600 | -0.59122000 |
| H | 2.23359000 | -1.71783300 | 0.29513100  |
| O | 2.06962300 | -1.82409900 | -1.74795100 |
| C | 4.09631900 | -1.14542600 | -0.57739400 |
| C | 4.81414300 | -0.64079700 | -1.67075400 |
| C | 4.80562000 | -1.63682600 | 0.52305000  |
| C | 6.20757100 | -0.62986100 | -1.65822900 |
| H | 4.26987600 | -0.24709500 | -2.52286800 |
| C | 6.20209900 | -1.62711200 | 0.53907300  |
| H | 4.26085700 | -2.03609400 | 1.37625900  |
| C | 6.90747600 | -1.12359300 | -0.55359300 |
| H | 6.75088300 | -0.23452100 | -2.51309700 |
| H | 6.73611000 | -2.01704700 | 1.40214000  |
| H | 7.99455600 | -1.11699200 | -0.54721000 |

**Table S76. Cartesien coordinates of benzimidazole-2-ylidene 10**

|   |             |             |             |
|---|-------------|-------------|-------------|
| C | 0.17232600  | -0.70291800 | -0.00006700 |
| C | 0.17232700  | 0.70291800  | 0.00000600  |
| C | 1.36294700  | 1.42820700  | -0.00009000 |
| C | 2.55632400  | 0.70203900  | -0.00022900 |
| C | 2.55632200  | -0.70204000 | -0.00028100 |
| C | 1.36294500  | -1.42821000 | -0.00019800 |
| C | -2.02733600 | 0.00000000  | 0.00021100  |
| H | 1.36669300  | 2.51405900  | -0.00006300 |
| H | 3.50302100  | 1.23483800  | -0.00029600 |
| H | 3.50301800  | -1.23484200 | -0.00039000 |
| H | 1.36669300  | -2.51406300 | -0.00022900 |
| N | -1.17175000 | -1.07520600 | 0.00003200  |
| N | -1.17174800 | 1.07520700  | 0.00019700  |
| C | -1.63878700 | -2.44848200 | 0.00017300  |
| H | -1.28640900 | -2.98225000 | -0.89047400 |
| H | -1.28720900 | -2.98183000 | 0.89139200  |
| H | -2.72870400 | -2.42133700 | -0.00031300 |
| C | -1.63878500 | 2.44848400  | 0.00017700  |
| H | -1.28610500 | 2.98226900  | 0.89069400  |
| H | -1.28750600 | 2.98181400  | -0.89117200 |
| H | -2.72870200 | 2.42134000  | 0.00102900  |

**Table S77. Cartesien coordinates of benzimidazole-2-ylidene 10, TS-1**

|   |             |             |             |
|---|-------------|-------------|-------------|
| C | -2.38228200 | 0.65395700  | 0.00287200  |
| C | -2.17664300 | -0.71821900 | -0.20811800 |
| C | -3.19938200 | -1.54038400 | -0.68025000 |
| C | -4.43382100 | -0.94084500 | -0.92933400 |
| C | -4.63872700 | 0.43335700  | -0.71694800 |
| C | -3.61475600 | 1.25601800  | -0.24714900 |
| C | -0.22913300 | 0.16763100  | 0.53377800  |
| H | -3.04348800 | -2.60033200 | -0.85222400 |
| H | -5.25386400 | -1.54935600 | -1.29885600 |
| H | -5.61333200 | 0.86467300  | -0.92521700 |
| H | -3.77454600 | 2.31772300  | -0.08765400 |
| N | -1.16257200 | 1.15498000  | 0.46420400  |
| N | -0.84866300 | -0.96898000 | 0.13874700  |
| C | -0.93415800 | 2.55385100  | 0.79184900  |
| H | -0.94788900 | 3.17052900  | -0.11337500 |
| H | -1.71146500 | 2.90586900  | 1.47716600  |
| H | 0.03590400  | 2.64766100  | 1.27839500  |
| C | -0.20830500 | -2.28388400 | 0.11234100  |
| H | -0.95165100 | -3.04142500 | 0.37379200  |
| H | 0.19321400  | -2.49534600 | -0.88340400 |
| H | 0.58691900  | -2.27075500 | 0.86217100  |
| C | 1.43623900  | 0.07124100  | 1.52858000  |
| H | 1.30922000  | 1.07906200  | 1.99460000  |
| O | 1.37464900  | -0.94793100 | 2.26542200  |
| C | 2.47774000  | 0.13708900  | 0.40877000  |
| C | 3.33052200  | -0.95359700 | 0.22356600  |
| C | 2.64890700  | 1.27373100  | -0.38967900 |
| C | 4.32081800  | -0.92158100 | -0.76059200 |
| H | 3.20818400  | -1.80985000 | 0.88014500  |
| C | 3.63726600  | 1.31252300  | -1.37213000 |
| H | 2.00245000  | 2.13792700  | -0.24239300 |
| C | 4.47507400  | 0.20950300  | -1.56384400 |
| H | 4.97941600  | -1.77664800 | -0.89460100 |
| H | 3.75846600  | 2.20145400  | -1.98680700 |
| H | 5.24775900  | 0.23792500  | -2.32805100 |

**Table S78. Cartesien coordinates of benzimidazole-2-ylidene 10, IM-1**

|   |            |             |             |
|---|------------|-------------|-------------|
| C | 2.45525300 | 0.45285400  | 0.24289900  |
| C | 1.98149100 | -0.82886900 | -0.08793700 |
| C | 2.84655200 | -1.91623000 | -0.18660000 |
| C | 4.20256400 | -1.68088900 | 0.05012900  |
| C | 4.67461500 | -0.40196800 | 0.37925400  |
| C | 3.80665600 | 0.68722500  | 0.48360200  |
| C | 0.22587800 | 0.57296000  | -0.04499700 |
| C | 2.48639200 | -2.90966600 | -0.43278200 |
| H | 4.90314500 | -2.50760300 | -0.01874300 |
| H | 5.73471400 | -0.25368800 | 0.56136700  |
| H | 4.17690300 | 1.67284600  | 0.74648900  |

|   |             |             |             |
|---|-------------|-------------|-------------|
| N | 1.33922700  | 1.28935200  | 0.27578500  |
| N | 0.60030200  | -0.71906800 | -0.24647000 |
| C | 1.36654700  | 2.74733400  | 0.33227700  |
| H | 0.93320300  | 3.12026800  | 1.26413800  |
| H | 2.40440400  | 3.07618500  | 0.26480200  |
| H | 0.81021000  | 3.13072500  | -0.52714900 |
| C | -0.26657100 | -1.73247000 | -0.84314800 |
| H | 0.36318800  | -2.52259000 | -1.25521000 |
| H | -0.95203000 | -2.15407400 | -0.10491300 |
| H | -0.82653800 | -1.24941600 | -1.64634000 |
| C | -1.09223400 | 1.20742500  | -0.42714500 |
| H | -1.15630200 | 2.17207200  | 0.14194200  |
| O | -0.85002800 | 1.32224200  | -1.74552800 |
| C | -2.34487500 | 0.42500800  | 0.00561700  |
| C | -3.30368900 | 0.13356100  | -0.96552700 |
| C | -2.58282000 | 0.05963900  | 1.33549500  |
| C | -4.48540000 | -0.52354500 | -0.61617200 |
| H | -3.08779800 | 0.43548100  | -1.98668300 |
| C | -3.75804200 | -0.60675500 | 1.68684300  |
| H | -1.84581500 | 0.29622500  | 2.10287500  |
| C | -4.71393800 | -0.89930600 | 0.70940700  |
| H | -5.22927300 | -0.74408800 | -1.37837200 |
| H | -3.93121400 | -0.89391900 | 2.72140800  |
| H | -5.63158300 | -1.41452100 | 0.98222200  |

**Table S79. Cartesian coordinates of benzimidazole-2-ylidene 10, TS-2**

|   |             |             |             |
|---|-------------|-------------|-------------|
| C | 2.92498500  | -0.80293300 | 0.18984100  |
| C | 3.00217500  | 0.52688200  | -0.24965800 |
| C | 4.19024800  | 1.06700400  | -0.73928100 |
| C | 5.30691300  | 0.23064500  | -0.76679700 |
| C | 5.23315800  | -1.09835100 | -0.32112400 |
| C | 4.04269600  | -1.63724500 | 0.16714700  |
| C | 0.88787600  | 0.12695200  | 0.43041000  |
| H | 4.24967700  | 2.09088900  | -1.09300600 |
| H | 6.24947400  | 0.61707800  | -1.14237500 |
| H | 6.12112500  | -1.72224400 | -0.35556200 |
| H | 3.99454300  | -2.66301900 | 0.51566200  |
| N | 1.61239500  | -1.02035700 | 0.59167900  |
| N | 1.73757200  | 1.08476300  | -0.06293300 |
| C | 1.10279800  | -2.30837100 | 1.07503200  |
| H | 0.09849500  | -2.48781100 | 0.66859700  |
| H | 1.78726300  | -3.08435600 | 0.72736000  |
| H | 1.06494600  | -2.30652300 | 2.16660300  |
| C | 1.49071500  | 2.51907000  | -0.20030800 |
| H | 2.43383400  | 3.03799800  | -0.01572100 |
| H | 1.12324900  | 2.76773700  | -1.19942400 |
| H | 0.75692800  | 2.84177500  | 0.53424900  |
| O | -0.55411800 | 0.19050800  | 0.68146600  |
| H | -1.09568200 | -0.75275200 | 0.04623300  |
| O | -0.83485100 | -0.30198800 | 1.99107800  |
| C | -1.30601200 | 1.44790500  | 0.33123700  |
| C | -1.90259000 | 2.23174100  | 1.32933700  |
| C | -1.50165200 | 1.80919500  | -1.01238500 |
| C | -2.63724500 | 3.36977100  | 0.99363200  |
| H | -1.78877900 | 1.92610100  | 2.36413900  |
| C | -2.23236400 | 2.94964300  | -1.34742600 |
| H | -1.08652500 | 1.18262900  | -1.79953500 |
| C | -2.79908800 | 3.73894600  | -0.34408100 |
| H | -3.08933500 | 3.96885500  | 1.78036900  |
| H | -2.37532600 | 3.21096400  | -2.39304700 |
| H | -3.37621700 | 4.62258500  | -0.60314700 |
| H | -1.45067400 | -1.04999100 | 1.78002200  |
| O | -1.74030200 | -1.99408400 | 0.20599500  |
| C | -2.89990900 | -2.31767500 | -0.51603700 |
| C | -3.25686700 | -3.78227900 | -0.18671400 |
| H | -4.16522500 | -4.11438700 | -0.70651800 |
| H | -2.43128600 | -4.44316200 | -0.47560700 |
| H | -3.41499800 | -3.89306800 | 0.89221800  |
| C | -2.63602900 | -2.18124600 | -2.03104800 |
| H | -1.77556100 | -2.79811200 | -2.31594500 |
| H | -3.49891300 | -2.49164900 | -2.63476400 |
| H | -2.40580900 | -1.13857200 | -2.28458600 |
| C | -4.07051200 | -1.39903300 | -0.10720100 |
| H | -4.26079800 | -1.49170100 | 0.96880400  |
| H | -3.82685600 | -0.35106200 | -0.31760700 |
| H | -4.99716400 | -1.64725300 | -0.64146700 |

**Table S80. Cartesian coordinates of benzimidazole-2-ylidene 10, IM-2**

|   |             |             |             |
|---|-------------|-------------|-------------|
| C | 2.48280200  | 0.49213500  | 0.08727100  |
| C | 2.03988000  | -0.82564200 | -0.13341500 |
| C | 2.92955900  | -1.89088800 | -0.17601400 |
| C | 4.29326600  | -1.61204900 | 0.00733200  |
| C | 4.73398800  | -0.30768900 | 0.23203000  |
| C | 3.83278400  | 0.76791500  | 0.27166400  |
| C | 0.21468000  | 0.54070600  | -0.13930600 |
| H | 2.58448200  | -2.90807400 | -0.33329300 |
| H | 5.01008600  | -2.42744200 | -0.02124100 |
| H | 5.79278600  | -0.11402600 | 0.37790100  |
| H | 4.18972300  | 1.78029800  | 0.43248300  |
| N | 1.36202600  | 1.32176000  | 0.06171300  |
| N | 0.65345100  | -0.78460600 | -0.29452100 |
| C | 1.33557500  | 2.66296500  | 0.62106700  |
| H | 0.70383600  | 2.69117900  | 1.51793300  |
| H | 2.35200500  | 2.94129800  | 0.90369800  |
| H | 0.94590700  | 3.38230400  | -0.10029200 |
| C | -0.07899800 | -1.79652200 | -1.03664500 |
| H | 0.63416700  | -2.39995700 | -1.60520700 |
| H | -0.66627200 | -2.45217000 | -0.38463100 |
| H | -0.76642500 | -1.30454100 | -1.73042800 |
| C | -1.07696400 | 0.99718700  | -0.22736100 |

|   |             |             |             |
|---|-------------|-------------|-------------|
| O | -1.22862800 | 2.34846200  | -0.58142300 |
| C | -2.30571900 | 0.23846100  | -0.01633100 |
| C | -3.50411900 | 0.65367000  | -0.64081100 |
| C | -2.38440000 | -0.84790500 | 0.88583700  |
| C | -4.70783100 | -0.00382300 | -0.39847300 |
| H | -3.47111800 | 1.48608700  | -1.33758200 |
| C | -3.58823500 | -1.50758000 | 1.11355500  |
| H | -1.49487500 | -1.14788900 | 1.43289000  |
| C | -4.76066900 | -1.09355800 | 0.47353700  |
| H | -5.61080400 | 0.33343700  | -0.90206800 |
| H | -3.61703400 | -2.33745600 | 1.81582200  |
| H | -5.70046100 | -1.60553400 | 0.66059700  |
| H | -1.89891600 | 2.73042300  | 0.01082500  |

**Table S81. Cartesian coordinates of benzimidazole-2-ylidene 10, TS-3**

|   |             |             |             |
|---|-------------|-------------|-------------|
| C | -2.10656900 | -1.30853100 | 0.69299200  |
| C | -1.48921900 | -1.97958200 | -0.36866300 |
| C | -2.17168000 | -2.94326600 | -1.11303200 |
| C | -3.48903100 | -3.21286400 | -0.74909000 |
| C | -4.10569800 | -2.54324800 | 0.32206300  |
| C | -3.42518700 | -1.58043500 | 1.06232900  |
| C | -0.00651800 | -0.53259200 | 0.52020400  |
| H | -1.71090000 | -3.46481800 | -1.94483100 |
| H | -4.05024500 | -3.95559400 | -1.30774300 |
| H | -5.13371900 | -2.78086100 | 0.57784400  |
| H | -3.90103900 | -1.06720700 | 1.89027800  |
| N | -1.17028900 | -0.42428400 | 1.21093300  |
| C | -0.18507800 | -1.48361600 | -0.44375900 |
| N | -1.46846900 | 0.43769700  | 2.36379500  |
| H | -2.50961000 | 0.75461000  | 2.27110000  |
| H | -1.32541000 | -0.13083100 | 3.28600600  |
| H | -0.81881600 | 1.31021200  | 2.36356700  |
| C | 0.78009500  | -1.99009200 | -1.42305600 |
| H | 0.33496400  | -2.86234000 | -1.90095700 |
| H | 0.99771800  | -1.23729100 | -2.18196600 |
| H | 1.70542900  | -2.28478800 | -0.93289300 |
| C | 1.21520300  | 0.28851300  | 0.88069000  |
| O | 1.31601300  | 0.24396300  | 2.25299200  |
| C | 2.52051200  | -0.17614900 | 0.21754100  |
| C | 3.32122200  | -1.08340200 | 0.92827600  |
| C | 2.98294400  | 0.28229500  | -1.02384300 |
| C | 4.52399700  | -1.54914500 | 0.39778000  |
| H | 2.98712300  | -1.39528900 | 1.91181000  |
| C | 4.19011900  | -0.17830600 | -1.55613800 |
| H | 2.40927500  | 1.01081600  | -1.58823300 |
| C | 4.96209600  | -1.10179100 | -0.85157400 |
| H | 5.12630800  | -2.25431600 | 0.96530700  |
| H | 4.53002100  | 0.19596400  | -2.51861400 |
| H | 5.90288100  | -1.45745500 | -1.26368300 |
| H | 1.21170300  | 1.39585100  | 2.40032400  |
| C | 0.94227700  | 1.98034800  | 0.58475900  |
| O | 0.89617800  | 2.48728500  | 1.83473200  |
| H | 1.84764200  | 2.28408300  | 0.02860600  |
| C | -0.27351100 | 2.30703000  | -0.28138800 |
| C | -1.24757300 | 3.18434100  | 0.21356800  |
| C | -0.42875000 | 1.82307000  | -1.58978100 |
| C | -2.35171200 | 3.54543200  | -0.56043500 |
| H | -1.10383500 | 3.58465900  | 1.21164200  |
| C | -1.53070600 | 2.18094500  | -2.36815900 |
| H | 0.32133000  | 1.16086200  | -2.01725700 |
| C | -2.50210100 | 3.04203100  | -1.85380100 |
| H | -3.09253100 | 4.23124200  | -0.15548300 |
| H | -1.62852500 | 1.78997900  | -3.37838000 |
| H | -3.36016200 | 3.32404200  | -2.45867600 |

**Table S82. Cartesian coordinates of benzimidazole-2-ylidene 10, IM-3**

|   |             |             |             |
|---|-------------|-------------|-------------|
| C | -2.21319900 | -1.27415700 | 0.60413400  |
| C | -1.59026400 | -1.90542300 | -0.47853900 |
| C | -2.25147600 | -2.87260000 | -1.23699500 |
| C | -3.56106700 | -3.17880400 | -0.87349600 |
| C | -4.18695600 | -2.54401100 | 0.21363000  |
| C | -3.52429000 | -1.58285000 | 0.97239700  |
| C | -0.12561600 | -0.45650400 | 0.44006400  |
| H | -1.77408100 | -3.37748800 | -2.06968400 |
| H | -4.10699400 | -3.92633700 | -1.44088600 |
| H | -5.20764700 | -2.81090900 | 0.47018000  |
| H | -4.00754400 | -1.10215800 | 1.81553500  |
| N | -1.28691200 | -0.38904300 | 1.13865300  |
| N | -0.30382900 | -1.36698500 | -0.55962800 |
| C | -1.56098900 | 0.38712800  | 2.35262700  |
| H | -2.61615800 | 0.67053200  | 2.32723300  |
| H | -1.34543000 | -0.22613800 | 3.22967200  |
| H | -0.94032600 | 1.27681300  | 2.38051400  |
| C | 0.62911800  | -1.76830900 | -1.61488600 |
| C | 0.04253400  | -2.19313500 | -2.43048800 |
| H | 1.17661400  | -0.90777800 | -1.98731400 |
| H | 1.34227600  | -2.50764500 | -1.24479800 |
| C | 1.16690600  | 0.25829800  | 0.96066500  |
| O | 1.18101100  | 0.00963200  | 2.27921500  |
| C | 2.44378700  | -0.30816800 | 0.27675300  |
| C | 3.00294700  | -1.45373900 | 0.86235800  |
| C | 3.10157800  | 0.25531800  | -0.82487100 |
| C | 4.15499700  | -2.04122900 | 0.34132000  |
| H | 2.52322100  | -1.84632600 | 1.75277100  |
| C | 4.26408700  | -0.32364700 | -1.34437400 |
| H | 2.72383300  | 1.15854700  | -1.29440600 |
| C | 4.79068900  | -1.47956300 | -0.76979400 |
| H | 4.56740400  | -2.93070600 | 0.81182300  |
| H | 4.76010500  | 0.13858100  | -2.19441700 |

|   |             |             |             |
|---|-------------|-------------|-------------|
| H | 5.69519400  | -1.92899900 | -1.17162100 |
| H | 1.11721800  | 1.57231700  | 2.57291800  |
| C | 1.05568400  | 1.90484300  | 0.73955700  |
| O | 0.92402000  | 2.41712800  | 2.03349200  |
| H | 2.02024300  | 2.22153900  | 0.31846200  |
| C | -0.04618000 | 2.40497700  | -0.18107900 |
| C | -1.03774700 | 3.27084400  | 0.30137000  |
| C | -0.08205500 | 2.05806400  | -1.54162900 |
| C | -2.04247500 | 3.75247700  | -0.53949600 |
| H | -0.99323600 | 3.57292200  | 1.34170900  |
| C | -1.08421800 | 2.53877100  | -2.38516100 |
| H | 0.68853400  | 1.41314700  | -1.95658700 |
| C | -2.07487000 | 3.38615500  | -1.88584200 |
| H | -2.79787100 | 4.42633200  | -0.14192200 |
| H | -1.08766200 | 2.25418100  | -3.43474100 |
| H | -2.85562600 | 3.76360200  | -2.54104800 |

**Table S83. Cartesian coordinates of benzimidazole-2-ylidene 10, TS-4**

|   |             |             |             |
|---|-------------|-------------|-------------|
| C | 2.86158400  | -0.22917900 | 0.41735100  |
| C | 2.43122900  | 0.00071900  | -0.89769200 |
| C | 3.33448300  | 0.09104700  | -1.95707400 |
| C | 4.68683400  | -0.05808500 | -1.65301400 |
| C | 5.11937900  | -0.28915200 | -0.33540600 |
| C | 4.21514900  | -0.37939400 | 0.72195200  |
| C | 0.60153100  | -0.05855500 | 0.44370900  |
| C | 3.00392300  | 0.27626400  | -2.97389800 |
| H | 5.42109600  | 0.00895600  | -2.45029000 |
| H | 6.18136400  | -0.39615300 | -0.13534700 |
| H | 4.55585700  | -0.55029000 | 1.73775100  |
| N | 1.70890600  | -0.26699200 | 1.20210500  |
| N | 1.04081100  | 0.08877100  | -0.83534700 |
| C | 1.72137600  | -0.54897900 | 2.63858100  |
| H | 0.79800400  | -1.05680600 | 2.90463300  |
| H | 2.57371200  | -1.20045500 | 2.84784100  |
| H | 1.79779300  | 0.37639000  | 3.21229200  |
| C | 0.19270800  | 0.25364300  | -2.01002100 |
| H | 0.62230100  | -0.32181700 | -2.83448700 |
| H | -0.79922400 | -0.13496400 | -1.79076300 |
| H | 0.11849300  | 1.30728900  | -2.29363700 |
| C | -1.02033600 | 0.64092700  | 1.34654300  |
| O | -0.61544200 | 1.01143300  | 2.49375400  |
| C | -1.36689700 | 1.78909100  | 0.39481500  |
| C | -0.61633400 | 2.96819600  | 0.52834900  |
| C | -2.41294100 | 1.77193900  | -0.53458100 |
| C | -0.87977400 | 4.08164100  | -0.26468700 |
| H | 0.16257200  | 2.99454800  | 1.28338000  |
| C | -2.69081100 | 2.89385500  | -1.32213500 |
| H | -3.02148300 | 0.88553700  | -0.65837500 |
| C | -1.92187300 | 4.04942300  | -1.19703700 |
| H | -0.28157000 | 4.98199600  | -0.14775900 |
| H | -3.51421000 | 2.85997500  | -2.03137600 |
| H | -2.13667000 | 4.92056600  | -1.81064700 |
| C | -1.26244700 | -0.49920100 | 3.16276800  |
| H | -2.00340500 | -0.61142500 | 1.44582300  |
| O | -1.66459000 | -1.25302900 | 2.65948900  |
| C | -3.00881700 | -0.15987500 | 1.52868700  |
| C | -2.03928700 | -1.63979400 | 0.33415200  |
| C | -1.03596600 | -2.61535100 | 0.22132900  |
| C | -3.10762400 | -1.69088100 | -0.57197200 |
| C | -1.07112200 | -3.56701900 | -0.79724600 |
| H | -0.24260000 | -2.64015000 | 0.95936800  |
| C | -3.14656900 | -2.63976000 | -1.59648000 |
| H | -3.93776400 | -0.99718300 | -0.46010400 |
| C | -2.12095700 | -3.57691700 | -1.71935400 |
| H | -0.28290500 | -4.31306800 | -0.86346000 |
| H | -3.98798100 | -2.65573000 | -2.28457400 |
| H | -2.14948300 | -4.32146400 | -2.51067500 |

**Table S84. Cartesian coordinates of 1,3-diphenyl-imidazole-2-ylidene 11**

|   |             |             |             |
|---|-------------|-------------|-------------|
| C | -0.00000100 | 0.34323400  | 0.00002000  |
| C | -0.67577800 | -1.86475900 | 0.00240200  |
| C | 0.67578400  | -1.86475600 | -0.00248300 |
| H | -1.37188000 | -2.68780900 | 0.03215200  |
| H | 1.37189500  | -2.68779800 | -0.03229600 |
| N | -1.06723600 | -0.52160800 | 0.00400500  |
| N | 1.06723700  | -0.52160400 | -0.00401100 |
| C | 2.42001000  | -0.07047000 | -0.01587200 |
| C | 2.71711100  | 1.19397800  | -0.53702200 |
| C | 3.44532200  | -0.87696400 | 0.48799100  |
| C | 4.03603300  | 1.64047500  | -0.55378700 |
| H | 1.90290700  | 1.80475400  | -0.90908500 |
| C | 4.76495600  | -0.42376800 | 0.45525600  |
| C | 3.21817900  | -1.84309500 | 0.92752600  |
| C | 5.06741600  | 0.83415700  | -0.06519800 |
| H | 4.25917900  | 2.62354100  | -0.95964200 |
| H | 5.55494400  | -1.05691900 | 0.84999600  |
| H | 6.09528300  | 1.18508200  | -0.08680800 |
| C | -2.42001300 | -0.07047300 | 0.01588000  |
| C | -2.71710000 | 1.19399900  | 0.53697900  |
| C | -3.44533800 | -0.87698600 | -0.48792500 |
| C | -4.03602000 | 1.64050200  | 0.55375200  |
| H | -1.90288500 | 1.80478900  | 0.90899700  |
| C | -4.76496900 | -0.42378100 | -0.45518900 |
| H | -3.21821500 | -1.84314400 | -0.92741100 |
| C | -5.06741500 | 0.83416800  | 0.06521400  |
| H | -4.25915500 | 2.62358600  | 0.95956800  |
| H | -5.55496800 | -1.05694700 | -0.84988400 |
| H | -6.09528000 | 1.18509900  | 0.08682500  |

**Table S85. Cartesian coordinates of 1,3-diphenyl-imidazole-2-ylidene 11, TS-1**

|   |             |             |             |
|---|-------------|-------------|-------------|
| C | 0.55068600  | -0.56673200 | 0.07973000  |
| C | 0.42670800  | -2.82470900 | 0.35565700  |
| C | 1.73531200  | -2.48783000 | 0.39902200  |
| H | -0.06330900 | -3.78370300 | 0.41136500  |
| H | 2.62335200  | -3.09091800 | 0.50219900  |
| N | -0.28445100 | -1.64102400 | 0.15061300  |
| N | 1.79683600  | -1.10529500 | 0.21783100  |
| C | 3.04457400  | -0.40088600 | 0.10441700  |
| C | 3.29726100  | 0.38657700  | -1.02334500 |
| C | 4.01021500  | -0.56625900 | 1.09993000  |
| C | 4.53508600  | 1.02017800  | -1.13585600 |
| H | 2.52270100  | 0.50972300  | -1.77912600 |
| C | 5.24815200  | 0.06326500  | 0.96631900  |
| H | 3.78742800  | -1.16941400 | 1.97562200  |
| C | 5.51202600  | 0.85724300  | -0.15084900 |
| H | 4.73577000  | 1.64019400  | -2.00495300 |
| H | 6.00028200  | -0.06151600 | 1.74022000  |
| H | 6.47491900  | 1.35021400  | -0.25182500 |
| C | -1.70370300 | -1.62372500 | -0.06153400 |
| C | -2.22139700 | -0.97673500 | -1.18509700 |
| C | -2.53508900 | -2.31216400 | 0.82497800  |
| C | -3.59719400 | -1.02241200 | -1.41088100 |
| H | -1.55005800 | -0.43738100 | -1.84953000 |
| C | -3.90715000 | -2.35806100 | 0.57984600  |
| H | -2.11342200 | -2.79199500 | 1.70367900  |
| C | -4.43975100 | -1.71426600 | -0.53868100 |
| H | -4.00929600 | -0.51565700 | -2.27875700 |
| H | -4.55815600 | -2.88942900 | 1.26835700  |
| H | -5.50932100 | -1.74809400 | -0.72658400 |
| C | 0.28698200  | 1.22021000  | -0.73294000 |
| H | 1.21388400  | 1.60204800  | -0.25512500 |
| O | 0.27229600  | 1.03015700  | -1.97989600 |
| C | -0.92127500 | 1.81142500  | -0.02079300 |
| C | -0.97944600 | 1.91361900  | 1.37366200  |
| C | -1.94130700 | 2.38021200  | -0.78736400 |
| C | -2.05259200 | 2.55060200  | 1.99434400  |
| H | -0.17995700 | 1.48127000  | 1.97309400  |
| C | -3.01597000 | 3.02363000  | -0.17016300 |
| H | -1.86314900 | 2.31590300  | -1.86849100 |
| C | -3.07687900 | 3.10708800  | 1.22172400  |
| H | -2.09160800 | 2.61708800  | 3.07909300  |
| H | -3.80369800 | 3.46550300  | -0.77599700 |
| H | -3.91291700 | 3.60752700  | 1.70407700  |

**Table S86. Cartesian coordinates of 1,3-diphenyl-imidazole-2-ylidene 11, IM-1**

|   |             |             |             |
|---|-------------|-------------|-------------|
| C | -0.54303500 | -0.48671600 | -0.07924900 |
| C | -0.35473000 | -2.68785800 | -0.51489000 |
| C | -1.66935700 | -2.37932300 | -0.56336000 |
| H | 0.15983400  | -3.62804000 | -0.62725000 |
| H | -2.53931900 | -2.99413500 | -0.72600100 |
| N | 0.33808600  | -1.51573900 | -0.21397000 |
| N | -1.78094600 | -1.01718900 | -0.29266000 |
| C | -3.04569700 | -0.35590100 | -0.11637400 |
| C | -3.28357400 | 0.37831100  | 1.05064000  |
| C | -4.03452800 | -0.52244500 | -1.08877200 |
| C | -4.54080200 | 0.95626300  | 1.22552500  |
| H | -2.47114500 | 0.49999800  | 1.77146000  |
| C | -5.29006400 | 0.05162100  | -0.88868300 |
| H | -3.81894600 | -1.07997400 | -1.99604700 |
| C | -5.54463300 | 0.79072400  | 0.26791800  |
| H | -4.73607200 | 1.53619200  | 2.12318400  |
| H | -6.06307000 | -0.07229100 | -1.64179500 |
| H | -6.52198200 | 1.24040800  | 0.41987400  |
| C | 1.74933500  | -1.51168700 | 0.06405300  |
| C | 2.20870800  | -0.98146600 | 1.27117900  |
| C | 2.61627000  | -2.11804200 | -0.84749300 |
| C | 3.57157900  | -1.06408200 | 1.55582100  |
| H | 1.49162200  | -0.48938500 | 1.92879000  |
| C | 3.97428400  | -2.19985100 | -0.54158300 |
| C | 2.23566600  | -2.50484300 | -1.78870100 |
| C | 4.45257800  | -1.67460900 | 0.66052800  |
| H | 3.94457100  | -0.64857800 | 2.48767000  |
| H | 4.65674800  | -2.66534000 | -1.24700800 |
| H | 5.51175000  | -1.73598800 | 0.89509400  |
| C | -0.31633400 | 0.90992800  | 0.50302600  |
| H | -1.19056600 | 1.49610800  | 0.12147900  |
| O | -0.33150700 | 0.68590100  | 1.83043900  |
| C | 0.89917300  | 1.65138200  | -0.08335000 |
| C | 1.14143800  | 1.72895200  | -1.45927100 |
| C | 1.72362600  | 2.35878300  | 0.79302000  |
| C | 2.20667500  | 2.48435800  | -1.95133800 |
| H | 0.49320900  | 1.19572300  | -2.15442400 |
| C | 2.78402100  | 3.12381400  | 0.30431500  |
| H | 1.50505900  | 2.28797700  | 1.85431900  |
| C | 3.03241000  | 3.18537500  | -1.06852400 |
| H | 2.39071700  | 2.52970700  | -3.02233200 |
| H | 3.41917300  | 3.67319600  | 0.99564900  |
| H | 3.86077700  | 3.77738000  | -1.44988900 |

**Table S87. Cartesian coordinates of 1,3-diphenyl-imidazole-2-ylidene 11, TS-2**

|   |             |             |             |
|---|-------------|-------------|-------------|
| C | -0.31020200 | -1.06206400 | -0.25888200 |
| C | 0.00451300  | -2.38031700 | -2.06701700 |
| C | -1.29843300 | -2.46053700 | -1.72983100 |
| H | 0.56347100  | -2.82884900 | -2.87195600 |
| H | -2.12024300 | -2.99435600 | -2.17815300 |

|   |             |             |             |
|---|-------------|-------------|-------------|
| N | 0.61475300  | -1.50419300 | -1.16884200 |
| N | -1.49992200 | -1.63615100 | -0.61948100 |
| C | -2.83315200 | -1.30460800 | -0.18196100 |
| C | -3.65274700 | -2.31305200 | 0.32127200  |
| C | -3.31309900 | -0.00785000 | -0.38758900 |
| C | -4.97903600 | -2.01571600 | 0.64129200  |
| H | -3.25232100 | -3.31070800 | 0.47630200  |
| C | -4.63701100 | 0.27523800  | -0.05482200 |
| H | -2.63757800 | 0.75764400  | -0.77070900 |
| C | -5.47179300 | -0.72376300 | 0.45525800  |
| H | -5.62177000 | -2.79450300 | 1.04197600  |
| H | -5.01936000 | 1.28163800  | -0.20209100 |
| H | -6.50334000 | -0.49464800 | 0.70796900  |
| C | 1.93440600  | -0.97499400 | -1.39271200 |
| C | 3.02052500  | -1.85025200 | -1.42987600 |
| C | 2.08557800  | 0.38917400  | -1.65539400 |
| C | 4.28671000  | -1.35103200 | -1.73541400 |
| H | 2.87583400  | -2.90350100 | -1.20767800 |
| C | 3.36086900  | 0.87380800  | -1.94575600 |
| H | 1.21910900  | 1.04989600  | -1.61334700 |
| C | 4.45815500  | 0.01057300  | -1.99163900 |
| H | 5.13787100  | -2.02539700 | -1.76323700 |
| H | 3.49210900  | 1.93378200  | -2.14435300 |
| H | 5.44614700  | 0.39824800  | -2.22423300 |
| C | -0.07731400 | -0.09254400 | 0.80585000  |
| H | -0.16643600 | 1.03663500  | 0.16229300  |
| O | -1.18268100 | -0.06350200 | 1.71584900  |
| C | 1.20797500  | -0.27481700 | 1.58619000  |
| C | 1.95839200  | 0.84180100  | 1.97625800  |
| C | 1.62298600  | -1.53974800 | 2.02899800  |
| C | 3.09316000  | 0.70130100  | 2.77548700  |
| H | 1.64753200  | 1.82877000  | 1.64766900  |
| C | 2.76003400  | -1.68716600 | 2.82347800  |
| H | 1.04216200  | -2.41790400 | 1.75571900  |
| C | 3.50052500  | -0.56483600 | 3.19910200  |
| H | 3.66204200  | 1.58168500  | 3.06389200  |
| H | 3.06276600  | -2.67702200 | 3.15655200  |
| H | 4.38601600  | -0.67615800 | 3.81967600  |
| H | -1.65269700 | 0.76995000  | 1.54032100  |
| O | -0.64502000 | 1.95131600  | -0.66738900 |
| C | -0.72353100 | 3.31778200  | -0.35799600 |
| C | -1.28200500 | 3.52815300  | 1.06834100  |
| H | -2.28212500 | 3.08170200  | 1.14868700  |
| H | -0.63305000 | 3.04974400  | 1.81300100  |
| H | -1.36936300 | 4.58983800  | 1.33334400  |
| C | -1.67625800 | 3.97831700  | -1.37712400 |
| H | -2.67750200 | 3.53761800  | -1.29986600 |
| H | -1.76501300 | 5.06195100  | -1.22310800 |
| H | -1.30976800 | 3.80052900  | -2.39438600 |
| C | 0.66556900  | 3.98678700  | -0.47051600 |
| H | 1.06138600  | 3.85100600  | -1.48417000 |
| H | 0.62817400  | 5.06381600  | -0.26001200 |
| H | 1.37485300  | 3.53066600  | 0.23048900  |

**Table S88. Cartesian coordinates of 1,3-diphenyl-imidazole-2-ylidene 11, IM-2**

|   |             |             |             |
|---|-------------|-------------|-------------|
| C | 0.48721100  | -0.17483100 | -0.54468500 |
| C | 0.37430200  | -2.29565200 | -1.37624700 |
| C | 1.66248900  | -1.93513300 | -1.41040100 |
| H | -0.08474800 | -3.21347200 | -1.70590600 |
| H | 2.51986700  | -2.47855300 | -1.77427500 |
| N | -0.39356200 | -1.27905600 | -0.75789900 |
| N | 1.80906700  | -0.66126800 | -0.81454800 |
| C | 2.99689200  | -0.27488500 | -0.16179700 |
| C | 4.23239100  | -0.42201900 | -0.82110800 |
| C | 2.97988600  | 0.25674200  | 1.14193800  |
| C | 5.41326200  | -0.05089700 | -0.18733600 |
| H | 4.25415800  | -0.80576000 | -1.83665900 |
| C | 4.17264100  | 0.64539800  | 1.75615600  |
| H | 2.03813000  | 0.32177400  | 1.67918300  |
| C | 5.39392600  | 0.49314800  | 1.10162900  |
| H | 6.35715800  | -0.17009800 | -0.71262000 |
| H | 4.13962100  | 1.05293500  | 2.76307500  |
| H | 6.31856100  | 0.79404400  | 1.58479200  |
| C | -1.51343800 | -1.61863200 | 0.04998000  |
| C | -2.46774000 | -2.51523800 | -0.45597200 |
| C | -1.69228000 | -1.08566800 | 1.33336500  |
| C | -3.56326200 | -2.88825300 | 0.32015200  |
| C | -2.36009000 | -2.90720800 | -1.46325600 |
| H | -2.79762500 | -1.45647200 | 2.09624700  |
| H | -0.96803700 | -0.38063000 | 1.72558600  |
| C | -3.73743800 | -2.36223200 | 1.60123000  |
| H | -4.29060200 | -3.58527200 | -0.08794400 |
| H | -2.91930600 | -1.03421600 | 3.09033000  |
| H | -4.59729800 | -2.64647900 | 2.20080000  |
| C | 0.15123700  | 1.14183900  | -0.40750300 |
| O | 1.11263700  | 2.12114700  | -0.25333000 |
| C | -1.20554200 | 1.71655200  | -0.39067900 |
| C | -1.44885100 | 2.87607000  | 0.37029300  |
| C | -2.25562100 | 1.20522000  | -1.17552600 |
| C | -2.70210900 | 3.48397800  | 0.36595400  |
| H | -0.64075400 | 3.29768500  | 0.95798100  |
| C | -3.50585700 | 1.81829300  | -1.17938100 |
| H | -2.08420000 | 0.33498500  | -1.79884000 |
| C | -3.73970400 | 2.95714400  | -0.40549100 |
| H | -2.86766400 | 4.37478900  | 0.96684500  |
| H | -4.29984600 | 1.40724800  | -1.79757500 |
| H | -4.71735800 | 3.43180400  | -0.40927500 |
| H | 1.98415100  | 1.73268500  | -0.07336700 |

**Table S89. Cartesian coordinates of 1,3-diphenyl-imidazole-2-ylidene 11, TS-3**

|   |             |             |             |
|---|-------------|-------------|-------------|
| C | 0.23847300  | -1.30020300 | -0.14716100 |
| C | -0.20737700 | -3.12370600 | -1.41545300 |
| C | 1.13352800  | -3.02403900 | -1.30396100 |
| H | -0.82962100 | -3.86105300 | -1.89533000 |
| H | 1.92581300  | -3.65102800 | -1.67804700 |
| N | -0.75711700 | -2.07827100 | -0.68233600 |
| N | 1.41202400  | -1.91123200 | -0.51780200 |
| C | 2.78289300  | -1.62196600 | -0.16108300 |
| C | 3.73143600  | -1.57260300 | -1.18992800 |
| C | 3.16402000  | -1.52402600 | 1.17655000  |
| C | 5.07693200  | -1.41231300 | -0.87151100 |
| H | 3.41230700  | -1.63375800 | -2.22644600 |
| C | 4.51658000  | -1.36012900 | 1.47904200  |
| H | 2.41018400  | -1.56588700 | 1.95131300  |
| C | 5.47163500  | -1.30597900 | 0.46541000  |
| H | 5.81426200  | -1.36189300 | -1.66744500 |
| H | 4.81730100  | -1.26973100 | 2.51832000  |
| H | 6.52129700  | -1.17549500 | 0.71254300  |
| C | -2.15591700 | -2.09080300 | -0.33763500 |
| C | -3.10001100 | -2.18955700 | -1.35984000 |
| C | -2.53683600 | -2.11444600 | 1.00516900  |
| C | -4.44985800 | -2.31416000 | -1.03221000 |
| H | -2.78284000 | -2.15073700 | -2.39785500 |
| C | -3.89018200 | -2.22771700 | 1.31811100  |
| H | -1.78399300 | -2.02688800 | 1.78177300  |
| C | -4.84629000 | -2.33302000 | 0.30565000  |
| H | -5.18948400 | -2.38588800 | -1.82426900 |
| H | -4.19559400 | -2.23683400 | 2.36014500  |
| H | -5.89845800 | -2.42478400 | 0.55921400  |
| O | 0.07101600  | -0.08611900 | 0.69309500  |
| C | 0.35300300  | -0.42592600 | 2.00840600  |
| C | -1.20106900 | 0.68195000  | 0.49950000  |
| C | -1.87637700 | 1.18566400  | 1.62132800  |
| C | -1.69605300 | 1.01313800  | -0.77327900 |
| C | -3.01445000 | 1.97893300  | 1.47587100  |
| H | -1.49308700 | 0.94025800  | 2.60552500  |
| C | -2.83724500 | 1.79815500  | -0.91826900 |
| H | -1.17586100 | 0.66586200  | -1.66294000 |
| C | -3.50569000 | 2.28673500  | 0.20671100  |
| H | -3.51983800 | 2.35775400  | 2.36137500  |
| H | -3.19776200 | 2.04139700  | -1.91488400 |
| H | -4.39161700 | 2.90609200  | 0.09305000  |
| H | 1.14398500  | 0.26407000  | 2.20555800  |
| C | 1.57728200  | 1.18235000  | 0.43497500  |
| O | 2.04780700  | 1.19455400  | 1.64899500  |
| H | 2.15345000  | 0.62740000  | -0.32752300 |
| C | 1.09329400  | 2.48044200  | -0.14937600 |
| C | 0.70285800  | 3.53399200  | 0.68675400  |
| C | 1.08990700  | 2.68403100  | -1.53461200 |
| C | 0.29780700  | 4.75308400  | 0.14750300  |
| H | 0.74515200  | 3.37785900  | 1.75986600  |
| C | 0.68905300  | 3.90462900  | -2.07933000 |
| H | 1.41826500  | 1.87941300  | -2.19182200 |
| C | 0.28655300  | 4.94317500  | -1.23768600 |
| H | -0.00433600 | 5.56276800  | 0.80778400  |
| H | 0.69836400  | 4.04845000  | -3.15749100 |
| H | -0.02419700 | 5.89719800  | -1.65667100 |

**Table S90. Cartesian coordinates of 1,3-diphenyl-imidazole-2-ylidene 11, IM-3**

|   |             |             |             |
|---|-------------|-------------|-------------|
| C | 0.21996800  | -1.36416700 | -0.23652600 |
| C | 1.27989000  | -3.35664000 | -0.19213800 |
| C | -0.04386400 | -3.60392100 | -0.08324000 |
| H | 2.13091600  | -4.01722300 | -0.22920500 |
| H | -0.59947600 | -4.52329500 | 0.00456600  |
| N | 1.43522600  | -1.98111800 | -0.28239200 |
| N | -0.69138600 | -2.36877200 | -0.10422300 |
| C | -2.11445400 | -2.31263800 | 0.15735900  |
| C | -2.54318800 | -2.31788700 | 1.48648800  |
| C | -3.02292900 | -2.36723500 | -0.89785100 |
| C | -3.90975400 | -2.34953300 | 1.76338700  |
| H | -1.81157400 | -2.29550300 | 2.28891400  |
| H | -4.38762100 | -2.40219100 | -0.60850900 |
| C | -2.66436400 | -2.33571600 | -1.91782100 |
| C | -4.83139800 | -2.39144000 | 0.71500500  |
| H | -4.25069000 | -2.34429300 | 2.79453600  |
| H | -5.10424100 | -2.42902500 | -1.42381200 |
| H | -5.89598500 | -2.41476600 | 0.93011200  |
| C | 2.75565400  | -1.39545500 | -0.37901600 |
| C | 3.58354400  | -1.47266700 | 0.74103400  |
| C | 3.21365500  | -0.87427200 | -1.58947900 |
| C | 4.89660600  | -1.00890300 | 0.65351500  |
| H | 3.19483800  | -1.87056200 | 1.67360700  |
| C | 4.52957900  | -0.41909900 | -1.66378000 |
| C | 2.52421800  | -0.78668600 | -2.41770200 |
| H | 5.37000600  | -0.48437000 | -0.54948600 |
| H | 5.54238700  | -1.05447500 | 1.52560100  |
| H | 4.89688300  | -0.00568300 | -2.59873800 |
| H | 6.39209400  | -0.12194400 | -0.61825100 |
| C | 0.07903600  | 0.17565600  | -0.54765800 |
| O | 0.62909100  | 0.30922500  | -1.76757700 |
| C | 0.76966500  | 0.93575000  | 0.60095100  |
| C | 1.71350300  | 1.91553000  | 0.28709900  |
| C | 0.46337900  | 0.69458300  | 1.94580500  |
| C | 2.34012800  | 2.64393400  | 1.29853900  |
| H | 1.94087400  | 2.07823100  | -0.76086500 |
| C | 1.09093600  | 1.41840000  | 2.96100900  |
| H | -0.27502000 | -0.06274500 | 2.20752300  |
| C | 2.03328800  | 2.39736900  | 2.63853600  |
| H | 3.07227000  | 3.40569900  | 1.04110400  |
| H | 0.84323100  | 1.22054800  | 4.00143900  |
| H | 2.52373900  | 2.96343400  | 3.42661700  |

|   |             |            |             |
|---|-------------|------------|-------------|
| H | -0.96731400 | 0.08178900 | -2.39033600 |
| C | -1.46117500 | 0.59663400 | -0.67398700 |
| O | -1.85770300 | 0.07636200 | -1.92809100 |
| H | -2.06699800 | 0.13925200 | 0.11468800  |
| C | -1.66111500 | 2.10189100 | -0.60379100 |
| C | -1.22425200 | 2.93126300 | -1.64646200 |
| C | -2.30874700 | 2.68576100 | 0.48985000  |
| C | -1.42542300 | 4.30927500 | -1.58713600 |
| H | -0.71500200 | 2.48380600 | -2.49280700 |
| C | -2.51449700 | 4.06566900 | 0.55146000  |
| H | -2.65974600 | 2.05283400 | 1.30266000  |
| C | -2.07253300 | 4.88275400 | -0.48903900 |
| H | -1.07833500 | 4.93983000 | -2.40249900 |
| H | -3.02415100 | 4.49945200 | 1.40862100  |
| H | -2.23385700 | 5.95726200 | -0.44793400 |

**Table S91. Cartesian coordinates of 1,3-diphenyl-imidazole-2-ylidene 11, TS-4**

|   |             |             |             |
|---|-------------|-------------|-------------|
| C | -0.51128800 | 1.34908100  | -0.28763600 |
| C | -1.92599600 | 3.13025300  | -0.33229700 |
| C | -0.67655800 | 3.61957200  | -0.17416000 |
| H | -2.88284500 | 3.62119400  | -0.41232500 |
| H | -0.30535000 | 4.62958000  | -0.10197000 |
| N | -1.81034200 | 1.74462400  | -0.40315600 |
| N | 0.18079700  | 2.51855800  | -0.14971300 |
| C | 1.59601700  | 2.70689800  | 0.05808900  |
| C | 2.02276100  | 3.20776100  | 1.29098600  |
| C | 2.50127500  | 2.47707000  | -0.97861200 |
| C | 3.37736400  | 3.47582500  | 1.49091700  |
| H | 1.29870700  | 3.37766000  | 2.08264400  |
| C | 3.85475400  | 2.74106400  | -0.76303400 |
| H | 2.15045700  | 2.04178500  | -1.90843300 |
| C | 4.29370300  | 3.24472200  | 0.46316600  |
| H | 3.71365400  | 3.86086600  | 2.44935500  |
| H | 4.56648400  | 2.55022600  | -1.56089800 |
| H | 5.34860800  | 3.45201600  | 0.61978000  |
| C | -3.00030000 | 0.92537200  | -0.48775900 |
| C | -3.76950200 | 0.75642100  | 0.66254800  |
| C | -3.41831100 | 0.41407400  | -1.71583200 |
| C | -4.97677200 | 0.05923800  | 0.58421600  |
| H | -3.41743000 | 1.15521900  | 1.60899200  |
| C | -4.62568300 | -0.27780600 | -1.78513100 |
| H | -2.78829500 | 0.53576200  | -2.58778300 |
| C | -5.40588400 | -0.45512600 | -0.63902500 |
| H | -5.57551500 | -0.08093600 | 1.47956600  |
| H | -4.95401300 | -0.68577100 | -2.73669300 |
| C | -6.34540300 | -0.99751700 | -0.70085200 |
| C | -0.15128100 | -0.54224000 | -0.52290400 |
| O | -0.89159500 | -0.90120900 | -1.49825400 |
| C | -0.48712700 | -1.06037200 | 0.87347300  |
| C | -1.47242000 | -2.04413100 | 0.99245600  |
| C | 0.17753700  | -0.62208600 | 2.02664600  |
| C | -1.79192300 | -2.58095100 | 2.24083800  |
| H | -1.97548600 | -2.36970000 | 0.08815200  |
| C | -0.13955600 | -1.15631300 | 3.27492100  |
| H | 0.94372000  | 0.14669600  | 1.95151600  |
| C | -1.12699600 | -2.13952800 | 3.38574200  |
| H | -2.55987400 | -3.34686600 | 2.31908900  |
| H | 0.38447300  | -0.80813000 | 4.16191200  |
| H | -1.37311000 | -2.55804700 | 4.35853400  |
| H | 0.52010600  | -0.33901600 | -2.56368700 |
| C | 1.36947800  | -0.57309900 | -0.90539100 |
| O | 1.42746600  | -0.10399400 | -2.24527500 |
| H | 1.95612500  | 0.09888100  | -0.27512500 |
| C | 1.95190100  | -1.97424500 | -0.77349000 |
| C | 1.46875000  | -3.03473300 | -1.55349500 |
| C | 3.00368100  | -2.22057600 | 0.11500400  |
| C | 2.02632500  | -4.30709100 | -1.44187700 |
| H | 0.64422300  | -2.85380700 | -2.23518500 |
| C | 3.56517900  | -3.49433400 | 0.22908100  |
| H | 3.39320300  | -1.40482900 | 0.72091600  |
| C | 3.07755400  | -4.54240300 | -0.55112600 |
| H | 1.63945300  | -5.12004500 | -2.05176100 |
| H | 4.38496300  | -3.66456600 | 0.92290300  |
| H | 3.51289100  | -5.53520300 | -0.46820600 |

**Table S92. Cartesian coordinates of pyrazoline-3-ylidene 12**

|   |             |             |             |
|---|-------------|-------------|-------------|
| C | 1.19572300  | 0.96140500  | -0.09326100 |
| C | 1.89609600  | -0.21394100 | 0.04280200  |
| C | 0.98706900  | -1.32958200 | 0.10791200  |
| H | 1.51659600  | 1.99317900  | -0.16735000 |
| H | 2.97524200  | -0.29176700 | 0.07326100  |
| N | -0.13518300 | 0.67682400  | -0.14759100 |
| N | -0.21219000 | -0.71982200 | 0.03014600  |
| C | -1.24067400 | 1.57942600  | 0.11195300  |
| H | -1.53850400 | 1.57405300  | 1.16895200  |
| H | -0.92591900 | 2.59012700  | -0.15808500 |
| H | -2.10535200 | 1.31614800  | -0.50386100 |
| C | -1.50744600 | -1.36803700 | -0.06051900 |
| H | -1.97257300 | -1.20164200 | -1.03973300 |
| H | -1.31185500 | -2.43099700 | 0.07063800  |
| H | -2.19063300 | -1.02374400 | 0.72496800  |

**Table S93. Cartesian coordinates of pyrazoline-3-ylidene 12, TS-1**

|   |             |             |             |
|---|-------------|-------------|-------------|
| C | -2.19736800 | -1.89774200 | 0.01891200  |
| C | -0.93253500 | -1.52773800 | -0.39120400 |
| C | -0.88905700 | -0.11330100 | -0.47482000 |



|   |             |             |             |
|---|-------------|-------------|-------------|
| H | -2.63810400 | -2.86665800 | 0.21257800  |
| H | -0.10761400 | -2.19385800 | -0.59971800 |
| N | -2.94362800 | -0.77937000 | 0.18647800  |
| N | -2.11395500 | 0.29608200  | -0.10878300 |
| C | -4.29036400 | -0.64124200 | 0.70653500  |
| H | -4.90170900 | -0.02462800 | 0.04129800  |
| H | -4.72986500 | -1.63867100 | 0.76010200  |
| H | -4.28953000 | -0.19974100 | 1.70920300  |
| C | -2.61073000 | 1.66644000  | -0.05080300 |
| H | -3.06502800 | 1.86780800  | 0.92408600  |
| H | -1.72642700 | 2.30334000  | -0.18372400 |
| H | -3.34475700 | 1.84501300  | -0.84410600 |
| C | 0.57384500  | 1.34598600  | -0.78156500 |
| H | 0.44414100  | 1.27047400  | -1.88270200 |
| O | 0.23915400  | 2.39087100  | -0.17658000 |
| C | 1.75640300  | 0.52812200  | -0.30327100 |
| C | 2.34842100  | -0.43969400 | -1.12192700 |
| C | 2.30035500  | 0.77896200  | 0.96027000  |
| C | 3.45757000  | -1.16212200 | -0.67897300 |
| H | 1.93800200  | -0.62117600 | -2.11446200 |
| C | 3.40767800  | 0.05870600  | 1.40669000  |
| H | 1.84148900  | 1.55553800  | 1.56506800  |
| C | 3.98828800  | -0.91612800 | 0.59000100  |
| H | 3.91352200  | -1.90935300 | -1.32448300 |
| H | 3.82585100  | 0.26057100  | 2.39029700  |
| H | 4.85484600  | -1.47410200 | 0.93627100  |

**Table S94. Cartesian coordinates of pyrazoline-3-ylidene 12, IM-1**

|   |             |             |             |
|---|-------------|-------------|-------------|
| C | 2.69152400  | -1.52105600 | 0.26652400  |
| C | 1.54859400  | -1.44854400 | 1.03554700  |
| C | 0.93205000  | -0.21429100 | 0.74709600  |
| H | 3.45202600  | -2.28477600 | 0.18460900  |
| H | 1.18936600  | -2.18663900 | 1.73655500  |
| N | 2.78788700  | -0.39100500 | -0.47129600 |
| N | 1.71278900  | 0.40604700  | -0.15880400 |
| C | 3.85215400  | 0.03953600  | -1.35931500 |
| H | 4.44578800  | 0.84277700  | -0.91114600 |
| H | 4.49557700  | -0.82266100 | -1.54033100 |
| H | 3.43727800  | 0.38059600  | -2.31136300 |
| C | 1.50214100  | 1.73460900  | -0.72880200 |
| H | 1.10294200  | 1.65623700  | -1.74441700 |
| H | 0.76169500  | 2.17155600  | -0.01672900 |
| H | 2.44160200  | 2.29291100  | -0.72626600 |
| C | -0.32457600 | 0.48809300  | 1.36281800  |
| H | -0.44094600 | -0.07452400 | 2.33003800  |
| O | -0.15274700 | 1.79494900  | 1.49540500  |
| C | -1.55172000 | 0.05595600  | 0.49223900  |
| C | -1.90450200 | -1.27596700 | 0.24191300  |
| C | -2.35465300 | 1.07455300  | -0.02288500 |
| C | -3.03153300 | -1.58332200 | -0.52206700 |
| H | -1.30037100 | -2.08623300 | 0.64868300  |
| C | -3.48447500 | 0.77288600  | -0.78670200 |
| H | -2.06394900 | 2.09320600  | 0.21748900  |
| C | -3.82497200 | -0.55686500 | -1.04246200 |
| H | -3.29413400 | -2.62257400 | -0.70866900 |
| H | -4.10472500 | 1.57623700  | -1.17905500 |
| H | -4.70510100 | -0.79452500 | -1.63536600 |

**Table S95. Cartesian coordinates of pyrazoline-3-ylidene 12, TS-2**

|   |             |             |             |
|---|-------------|-------------|-------------|
| C | -2.89278600 | -1.99596900 | -0.97079000 |
| C | -1.53465200 | -2.01551300 | -0.77432500 |
| C | -1.21516000 | -0.90743200 | 0.05158300  |
| H | -3.54021400 | -2.67702500 | -1.50457100 |
| H | -0.83090000 | -2.74212300 | -1.14634400 |
| N | -3.42255100 | -0.92747800 | -0.32842100 |
| N | -2.39244600 | -0.26113600 | 0.30603300  |
| C | -4.82005500 | -0.60100000 | -0.12987800 |
| H | -5.07645500 | 0.36717800  | -0.57171500 |
| H | -5.40528400 | -1.37574800 | -0.62781100 |
| H | -5.07392600 | -0.59464900 | 0.93516800  |
| C | -2.59718900 | 1.02541900  | 0.97562800  |
| H | -3.54454300 | 1.44822400  | 0.63870100  |
| H | -2.60908400 | 0.89002400  | 2.05892400  |
| H | -1.77216800 | 1.69548400  | 0.69004700  |
| C | 0.06401600  | -0.40157600 | 0.53510000  |
| H | 0.21380700  | 0.79018800  | 0.03010600  |
| O | -0.04022200 | 0.02653700  | 1.89699100  |
| C | 1.25791400  | -1.26894500 | 0.26024500  |
| C | 1.64419500  | -1.57496600 | -1.05726600 |
| C | 2.05551700  | -1.74596900 | 1.31139200  |
| C | 2.76727000  | -2.36219400 | -1.31276500 |
| H | 1.06927200  | -1.17576400 | -1.89037900 |
| C | 3.18375600  | -2.52507800 | 1.05468600  |
| C | 1.77559800  | -1.48899800 | 2.32715300  |
| H | 3.54291900  | -2.84465300 | -0.25642700 |
| H | 3.04645200  | -2.58362600 | -2.34027300 |
| H | 3.78580800  | -2.88641500 | 1.88530200  |
| H | 4.42309100  | -3.45100000 | -0.45394400 |
| H | 0.19771500  | 0.98006800  | 1.82426300  |
| O | 0.12706300  | 2.10618600  | 0.27190800  |
| C | 1.06126900  | 2.96688100  | -0.33217800 |
| C | 2.49323600  | 2.60892900  | 0.11665500  |
| H | 2.74226000  | 1.58229400  | -0.17643800 |
| H | 3.24315400  | 3.28014100  | -0.32221000 |
| H | 2.57118800  | 2.67564500  | 1.20831500  |
| C | 0.72414900  | 4.40320500  | 0.11497700  |
| H | 1.41766600  | 5.14144400  | -0.30867900 |
| H | -0.29332500 | 4.66532000  | -0.19834000 |
| H | 0.76910800  | 4.47368700  | 1.20786000  |

|   |             |            |             |
|---|-------------|------------|-------------|
| C | 0.95505800  | 2.86417300 | -1.86860000 |
| H | 1.63159800  | 3.56127800 | -2.38011800 |
| H | 1.20375400  | 1.84816100 | -2.20014200 |
| H | -0.07105300 | 3.08285200 | -2.18758600 |

**Table S96. Cartesien coordinates of pyrazoline-3-ylidene 12, IM-2**

|   |             |             |             |
|---|-------------|-------------|-------------|
| C | 2.34864500  | -1.73476700 | -0.19634800 |
| C | 1.03185100  | -1.45049000 | -0.24044000 |
| C | 0.88222600  | -0.02157600 | -0.04185900 |
| H | 2.84933400  | -2.68101600 | -0.35811200 |
| H | 0.22818900  | -2.15004800 | -0.41014900 |
| N | 3.11994600  | -0.60727400 | 0.07966900  |
| N | 2.20194500  | 0.50879700  | 0.06399600  |
| C | 4.29205400  | -0.37861700 | -0.76893700 |
| H | 4.85498800  | 0.47770100  | -0.38821600 |
| H | 4.93532600  | -1.26200100 | -0.71011400 |
| H | 4.01668100  | -0.18967700 | -1.81598400 |
| C | 2.48069600  | 1.44626700  | 1.15219700  |
| H | 3.53237600  | 1.74236400  | 1.10467000  |
| H | 1.85738000  | 2.32751400  | 1.00648000  |
| H | 2.27924400  | 1.00670400  | 2.14021200  |
| C | -0.25682400 | 0.73390400  | -0.03117800 |
| O | -0.11353600 | 2.11965600  | -0.14010700 |
| C | -1.62944500 | 0.22349100  | -0.02445400 |
| C | -2.00667800 | -0.94885100 | 0.66567000  |
| C | -2.64801500 | 0.95461400  | -0.67481700 |
| C | -3.32765600 | -1.38719800 | 0.66759900  |
| H | -1.25942300 | -1.49690300 | 1.23096500  |
| C | -3.97079800 | 0.51767300  | -0.65921500 |
| H | -2.38308800 | 1.85472300  | -1.22220400 |
| C | -4.32075100 | -0.65909100 | 0.00561000  |
| H | -3.58888600 | -2.29245900 | 1.21041100  |
| H | -4.73094300 | 1.09595300  | -1.17896000 |
| H | -5.35243500 | -0.99961000 | 0.01698200  |
| H | -0.83553500 | 2.52667700  | 0.36625400  |

**Table S97. Cartesien coordinates of pyrazoline-3-ylidene 12, TS-3**

|   |             |             |             |
|---|-------------|-------------|-------------|
| C | 3.41517400  | 1.13832800  | -1.41869800 |
| C | 2.10250400  | 1.36245000  | -1.07532200 |
| C | 1.76029500  | 0.41329600  | -0.08489100 |
| H | 4.06287300  | 1.64740300  | -2.11819200 |
| H | 1.45660000  | 2.14142500  | -1.44448700 |
| N | 3.88674400  | 0.10123600  | -0.69253200 |
| N | 2.86423400  | -0.36522000 | 0.10218500  |
| C | 5.18794600  | -0.53632700 | -0.76602000 |
| H | 5.11825400  | -1.54047600 | -1.19711700 |
| H | 5.81253400  | 0.08347500  | -1.41088500 |
| H | 5.64878800  | -0.59387200 | 0.22346700  |
| C | 3.09440300  | -1.46336800 | 1.04474800  |
| H | 3.59768200  | -1.09052200 | 1.94193800  |
| H | 2.12197300  | -1.90022200 | 1.31242100  |
| C | 3.70627900  | -2.22472000 | 0.55582900  |
| C | 0.51151300  | 0.21399700  | 0.68948200  |
| O | 0.82271600  | 0.07538900  | 2.03649000  |
| C | -0.53620200 | 1.26711600  | 0.42397500  |
| C | -1.00948200 | 1.55879300  | -0.86687800 |
| C | -1.08699800 | 1.97419200  | 1.50277300  |
| C | -1.98105500 | 2.53815000  | -1.07300900 |
| H | -0.63968500 | 0.99632800  | -1.71929000 |
| C | -2.06435100 | 2.94811400  | 1.29787800  |
| H | -0.72903300 | 1.74538100  | 2.49991400  |
| C | -2.51296300 | 3.24128700  | 0.00912900  |
| H | -2.33467700 | 2.73886500  | -2.08150900 |
| H | -2.47430400 | 3.48335600  | 2.15123500  |
| H | -3.27408100 | 4.00074800  | -0.15046900 |
| H | 0.52506000  | -0.90480000 | 2.19888800  |
| C | -0.07292500 | -1.56181700 | 0.31760300  |
| O | 0.59255400  | -1.82239900 | -0.53339500 |
| H | 0.17779800  | -2.16352200 | 1.46021600  |
| C | -1.50837100 | -1.57129400 | -0.14795400 |
| C | -1.82972900 | -1.62514200 | -1.50881900 |
| C | -2.54908800 | -1.58433900 | 0.78969500  |
| C | -3.15980400 | -1.67300900 | -1.93090800 |
| H | -1.02748000 | -1.64624900 | -2.24572700 |
| C | -3.87781600 | -1.62566900 | 0.37357100  |
| H | -2.29200700 | -1.58272600 | 1.84423500  |
| C | -4.18944200 | -1.66761400 | -0.98898400 |
| H | -3.39138000 | -1.72263400 | -2.99249800 |
| H | -4.67574900 | -1.63238300 | 1.11250500  |
| H | -5.22680600 | -1.70589400 | -1.31231200 |

**Table S98. Cartesien coordinates of pyrazoline-3-ylidene 12, IM-3**

|   |            |             |             |
|---|------------|-------------|-------------|
| C | 3.50362500 | 1.17529200  | -1.24031900 |
| C | 2.16838600 | 1.35701800  | -0.95026500 |
| C | 1.76677600 | 0.27645300  | -0.13990400 |
| H | 4.19165000 | 1.76288300  | -1.83154000 |
| H | 1.53865300 | 2.17444300  | -1.26012800 |
| N | 3.92541700 | 0.04120000  | -0.64278300 |
| N | 2.85437500 | -0.52162100 | 0.00776500  |
| C | 5.23844700 | -0.57698200 | -0.69837400 |
| H | 5.20235700 | -1.53643300 | -1.22366300 |
| H | 5.89035500 | 0.10371500  | -1.24731900 |
| H | 5.64325100 | -0.72290100 | 0.30648200  |
| C | 3.04531000 | -1.67438000 | 0.88972000  |
| H | 3.44532300 | -1.33846700 | 1.85003400  |
| H | 2.07305800 | -2.14578400 | 1.05520100  |

|   |             |             |             |
|---|-------------|-------------|-------------|
| H | 3.72372200  | -2.38261300 | 0.40917500  |
| C | 0.46724300  | 0.03104800  | 0.66056200  |
| O | 0.82672500  | -0.08972800 | 1.95349300  |
| C | -0.49073900 | 1.20814000  | 0.38735200  |
| C | -0.97314600 | 1.54164800  | -0.88630300 |
| C | -0.88208400 | 1.99154700  | 1.47663200  |
| C | -1.82287700 | 2.63449900  | -1.06580200 |
| H | -0.69967800 | 0.93742200  | -1.74780900 |
| C | -1.73756700 | 3.08071300  | 1.30229800  |
| H | -0.49372100 | 1.71482600  | 2.45097900  |
| C | -2.20868400 | 3.40946000  | 0.03023900  |
| H | -2.19250700 | 2.87302400  | -2.06035200 |
| H | -2.03443600 | 3.67679400  | 2.16235700  |
| H | -2.87418200 | 4.25818100  | -0.10748100 |
| H | 0.37626000  | -1.53244700 | 1.96678300  |
| C | -0.17966600 | -1.45657500 | 0.18548600  |
| H | 0.38854000  | -1.81077200 | -0.69027500 |
| O | 0.07743700  | -2.27054300 | 1.29732100  |
| C | -1.64784200 | -1.47148400 | -0.17610100 |
| C | -2.06345700 | -1.61782500 | -1.50425000 |
| C | -2.62605700 | -1.37149200 | 0.82311900  |
| C | -3.41975200 | -1.64258900 | -1.83643200 |
| H | -1.31507600 | -1.72463500 | -2.28853800 |
| C | -3.98006700 | -1.39363800 | 0.49668100  |
| H | -2.31032500 | -1.28743300 | 1.85825000  |
| C | -4.38399200 | -1.52635400 | -0.83526700 |
| H | -3.72135600 | -1.76226600 | -2.87450000 |
| H | -4.72559300 | -1.31120100 | 1.28403600  |
| H | -5.44127600 | -1.54819800 | -1.08749500 |

**Table S99. Cartesian coordinates of pyrazoline-3-ylidene 12, TS-4**

|   |             |             |             |
|---|-------------|-------------|-------------|
| C | 3.92592900  | 0.98882600  | -0.74222000 |
| C | 2.55951000  | 1.17059400  | -0.77462000 |
| C | 1.93581400  | -0.03035600 | -0.34865400 |
| H | 4.74716800  | 1.64847100  | -0.98860800 |
| H | 2.04332000  | 2.07765000  | -1.05190500 |
| N | 4.18362300  | -0.26653800 | -0.30708000 |
| N | 2.95482300  | -0.87533300 | -0.09500600 |
| C | 5.45846100  | -0.94500000 | -0.17220600 |
| H | 5.56628900  | -1.74643000 | -0.91130100 |
| H | 6.24433100  | -0.20622900 | -0.33786700 |
| H | 5.57453500  | -1.36095300 | 0.83271700  |
| C | 2.89768900  | -2.23143900 | 0.43454200  |
| H | 3.16344300  | -2.24355600 | 1.49678300  |
| H | 1.86845400  | -2.57095800 | 0.30561400  |
| C | 3.57103900  | -2.88599200 | -0.12622300 |
| O | 0.05425600  | -0.21600400 | 0.56897600  |
| O | 0.29616800  | -0.58871800 | 1.75126600  |
| C | -0.36465800 | 1.22159300  | 0.32767200  |
| C | -0.71523600 | 1.71141900  | -0.93777300 |
| C | -0.41764500 | 2.08685400  | 1.42574800  |
| C | -1.10939000 | 3.03948600  | -1.10060900 |
| H | -0.67499600 | 1.05581900  | -1.80320600 |
| C | -0.81041700 | 3.41595600  | 1.26538700  |
| H | -0.14976000 | 1.68888900  | 2.39907000  |
| C | -1.15783900 | 3.89730100  | 0.00174400  |
| H | -1.38359600 | 3.40435300  | -2.08745700 |
| H | -0.84962700 | 4.07621100  | 2.12854400  |
| H | -1.46801100 | 4.93153800  | -0.12484700 |
| H | -0.01960100 | -2.29949900 | 1.18087600  |
| C | -0.62931100 | -1.32688700 | -0.30741800 |
| H | -0.28596500 | -1.28151900 | -1.34392000 |
| O | -0.20880500 | -2.57029300 | 0.24682000  |
| C | -2.14946900 | -1.22367600 | -0.27924900 |
| C | -2.88182500 | -1.21943900 | -1.47063600 |
| C | -2.84517900 | -1.17057000 | 0.93742100  |
| C | -4.27734000 | -1.16242600 | -1.45599700 |
| H | -2.35430200 | -1.26961000 | -2.42144900 |
| C | -4.23725300 | -1.11275100 | 0.95612600  |
| H | -2.28398800 | -1.16278500 | 1.86735800  |
| C | -4.95944000 | -1.10907700 | -0.24068500 |
| H | -4.82921000 | -1.16360800 | -2.39288300 |
| H | -4.76196900 | -1.06791600 | 1.90739400  |
| H | -6.04552100 | -1.06512000 | -0.22406500 |

**Table S100. Cartesian coordinates of imidazole-5-ylidene 13**

|   |             |             |             |
|---|-------------|-------------|-------------|
| C | 0.02724500  | -0.84600300 | -0.00365400 |
| C | -0.63006200 | 1.25813700  | 0.00695100  |
| C | 0.75257400  | 1.34964800  | -0.00865700 |
| N | 1.09207800  | -0.02493000 | -0.01647900 |
| H | 0.02400600  | -1.92662800 | -0.00622800 |
| H | -1.37593400 | 2.04241700  | 0.01135600  |
| N | -1.06576700 | -0.07334900 | 0.01026100  |
| C | 2.47198900  | -0.48792300 | 0.00849100  |
| H | 2.88815800  | -0.39184300 | 1.01652700  |
| H | 2.53285700  | -1.53367700 | -0.30927900 |
| H | 3.05375500  | 0.13985500  | -0.66801100 |
| C | -2.44152800 | -0.54670700 | -0.00174100 |
| H | -2.98456500 | -0.13444500 | 0.85400800  |
| H | -2.94284100 | -0.23364000 | -0.92304900 |
| H | -2.46092000 | -1.63699900 | 0.05986300  |

**Table S101. Cartesian coordinates of imidazole-5-ylidene 13, TS-1**

|   |             |             |             |
|---|-------------|-------------|-------------|
| C | -2.91389500 | 0.49241400  | -0.80785700 |
| C | -2.07142800 | -1.01474300 | 0.56190700  |
| C | -1.06106400 | -0.10372800 | 0.35507100  |

|   |             |             |             |
|---|-------------|-------------|-------------|
| N | -1.64910000 | 0.82282700  | -0.51240000 |
| H | -3.59059600 | 1.03676000  | -1.44983400 |
| H | -2.09524200 | -1.90666300 | 1.17162300  |
| N | -3.20650400 | -0.64188200 | -0.15914000 |
| C | -0.95478600 | 2.00567900  | -1.02734500 |
| H | -0.28545400 | 1.71471300  | -1.84160500 |
| H | -1.68884000 | 2.72786000  | -1.39367000 |
| H | -0.36795700 | 2.42105200  | -0.20363000 |
| C | -4.48620700 | -1.33729500 | -0.19243200 |
| H | -4.34739700 | -2.35729500 | -0.56192100 |
| H | -4.91881000 | -1.37479800 | 0.81146200  |
| H | -5.17302400 | -0.80911800 | -0.85661000 |
| C | 0.62692000  | 0.56746400  | 1.45718500  |
| H | 0.34643800  | -0.13224100 | 2.27262600  |
| O | 0.49290600  | 1.79811500  | 1.61630900  |
| C | 1.73982400  | 0.00959500  | 0.59049000  |
| C | 1.97460500  | -1.36703700 | 0.49676500  |
| C | 2.59926700  | 0.89050400  | -0.07169500 |
| C | 3.03533800  | -1.85761500 | -0.26175400 |
| H | 1.31092400  | -2.05487500 | 1.01831600  |
| C | 3.66118800  | 0.40399800  | -0.83700500 |
| H | 2.42541900  | 1.95627600  | 0.04502200  |
| C | 3.88146500  | -0.97098200 | -0.93647800 |
| H | 3.20712900  | -2.92961600 | -0.32774100 |
| H | 4.32488700  | 1.09839000  | -1.34754000 |
| H | 4.71114800  | -1.35150600 | -1.52730600 |

**Table S102. Cartesien coordinates of imidazole-5-ylidene 13, IM-1**

|   |             |             |             |
|---|-------------|-------------|-------------|
| C | -2.65210400 | 0.30875900  | -0.98748700 |
| C | -2.02159500 | -0.71800000 | 0.86057400  |
| C | -1.00412400 | 0.13203800  | 0.50857100  |
| N | -1.43812700 | 0.75683600  | -0.65897100 |
| H | -3.23614700 | 0.63401400  | -1.83472500 |
| H | -2.11390200 | -1.38150100 | 1.70615400  |
| N | -3.03820500 | -0.59678000 | -0.07877100 |
| C | -0.68386800 | 1.81393300  | -1.34728200 |
| H | 0.05118100  | 1.36170000  | -2.01735900 |
| H | -1.38093300 | 2.43878900  | -1.91043400 |
| H | -0.17533700 | 2.34851500  | -0.52579100 |
| C | -4.31314000 | -1.30296900 | -0.06331100 |
| H | -4.14016400 | -2.38234800 | -0.08097000 |
| H | -4.87480600 | -1.04051300 | 0.83743400  |
| H | -4.89350200 | -1.02005700 | -0.94328700 |
| C | 0.28082700  | 0.60323400  | 1.24458200  |
| H | 0.21365200  | 0.05194600  | 2.22638300  |
| O | 0.27505600  | 1.92748500  | 1.33311100  |
| C | 1.51895100  | -0.02409000 | 0.53074600  |
| C | 1.63938200  | -1.38898600 | 0.24185500  |
| C | 2.57593200  | 0.82908600  | 0.20965300  |
| C | 2.79103600  | -1.89049400 | -0.36715400 |
| H | 0.82660500  | -2.06950000 | 0.49563000  |
| C | 3.73270300  | 0.33281200  | -0.39604100 |
| H | 2.44873700  | 1.87797400  | 0.46331700  |
| C | 3.84325500  | -1.02810900 | -0.68948900 |
| H | 2.87076900  | -2.95287400 | -0.58893700 |
| H | 4.55179100  | 1.00730900  | -0.63760700 |
| H | 4.74240400  | -1.41700100 | -1.16181000 |

**Table S103. Cartesien coordinates of imidazole-5-ylidene 13, TS-2**

|   |             |             |             |
|---|-------------|-------------|-------------|
| C | -3.23429600 | 1.52800000  | -0.14578100 |
| C | -1.12226900 | 1.84307400  | 0.43090300  |
| C | -1.18827300 | 0.62279100  | -0.18857300 |
| N | -2.53742500 | 0.46027600  | -0.54133400 |
| H | -4.29363200 | 1.68497900  | -0.28277800 |
| H | -0.22964100 | 2.35319100  | 0.76598900  |
| N | -2.39435200 | 2.38769100  | 0.45304000  |
| C | -3.04882200 | -0.68788000 | -1.29114300 |
| H | -2.99169200 | -1.58227600 | -0.66780400 |
| H | -4.08168100 | -0.49312700 | -1.58669300 |
| H | -2.41472600 | -0.82143500 | -2.16942500 |
| C | -2.76062600 | 3.68081000  | 1.02126800  |
| H | -2.57092300 | 3.68181700  | 2.09761500  |
| H | -2.17040100 | 4.46929400  | 0.54814100  |
| H | -3.82100300 | 3.86639700  | 0.84072300  |
| C | -0.07552700 | -0.28095500 | -0.56691000 |
| H | 0.99248100  | 0.50319100  | -0.20925100 |
| O | 0.06680200  | -0.21764500 | -2.00546800 |
| C | -0.13976200 | -1.66273300 | -0.04969300 |
| C | -0.65277100 | -1.95444700 | 1.23441100  |
| C | 0.37397600  | -2.74066200 | -0.80096100 |
| C | -0.64901400 | -3.25336500 | 1.73869900  |
| H | -1.04399100 | -1.14618900 | 1.85014000  |
| C | 0.37795000  | -4.03708700 | -0.28948600 |
| H | 0.76414800  | -2.53770000 | -1.79240300 |
| C | -0.13406800 | -4.30931400 | 0.98181800  |
| H | -1.04878700 | -3.44120200 | 2.73324000  |
| H | 0.78293000  | -4.84585800 | -0.89441300 |
| H | -0.13032600 | -5.32189300 | 1.37631600  |
| H | 0.78333700  | 0.43807100  | -2.11680500 |
| O | 1.72468400  | 1.50218700  | -0.32077000 |
| C | 3.05811700  | 1.28304200  | 0.06819100  |
| C | 3.69605500  | 0.16594700  | -0.78701800 |
| H | 4.74980400  | -0.00555900 | -0.52944300 |
| H | 3.15613700  | -0.77865700 | -0.64930900 |
| H | 3.64412200  | 0.43460400  | -1.84933100 |
| C | 3.82483000  | 2.60111400  | -0.15317000 |
| H | 3.37201100  | 3.40130000  | 0.44473700  |
| H | 4.88432600  | 2.51904600  | 0.12400600  |
| H | 3.76317800  | 2.89509400  | -1.20745200 |

|   |            |             |            |
|---|------------|-------------|------------|
| C | 3.12471900 | 0.89068800  | 1.56122300 |
| H | 4.15598700 | 0.74853400  | 1.91132100 |
| H | 2.66148300 | 1.67500300  | 2.17292800 |
| H | 2.57608800 | -0.04287800 | 1.73525000 |

**Table S104. Cartesien coordinates of imidazole-5-ylidene 13, IM-2**

|   |             |             |             |
|---|-------------|-------------|-------------|
| C | 3.21557600  | 0.06580100  | 0.05242300  |
| C | 1.35282200  | -1.11835900 | -0.17098700 |
| C | 0.94287100  | 0.23476700  | -0.04982400 |
| N | 2.17929000  | 0.93840700  | 0.10725900  |
| H | 4.25623900  | 0.32276100  | 0.16160400  |
| H | 0.78850100  | -1.98785100 | -0.45643900 |
| N | 2.73183600  | -1.16041300 | -0.11524200 |
| C | 2.35202400  | 2.33445800  | 0.48782900  |
| H | 1.71829500  | 2.56025200  | 1.34863100  |
| H | 3.40178500  | 2.48879100  | 0.75401800  |
| H | 2.07156700  | 3.00662200  | -0.32281900 |
| C | 3.53206300  | -2.36720700 | -0.24674900 |
| H | 3.25558300  | -3.07816600 | 0.53688000  |
| H | 3.35702200  | -2.82628400 | -1.22436700 |
| H | 4.58971500  | -2.11455500 | -0.15242400 |
| C | -0.30709700 | 0.85244300  | -0.06515200 |
| O | -0.30817000 | 2.25933100  | -0.25126900 |
| C | -1.59182600 | 0.20247000  | 0.00679000  |
| C | -1.77944100 | -1.16855800 | 0.33271000  |
| C | -2.77400800 | 0.95220700  | -0.24092700 |
| C | -3.04602600 | -1.74287300 | 0.36753900  |
| H | -0.92940800 | -1.77792300 | 0.61805100  |
| C | -4.03380600 | 0.36548800  | -0.20829200 |
| H | -2.68630100 | 2.01590000  | -0.43514900 |
| C | -4.19054200 | -0.99270100 | 0.08361800  |
| H | -3.13944100 | -2.79519700 | 0.63030200  |
| H | -4.90844500 | 0.98154700  | -0.40907100 |
| H | -5.17604700 | -1.44980700 | 0.10282300  |
| H | -0.54723500 | 2.42570600  | -1.17985400 |

**Table S105. Cartesien coordinates of imidazole-5-ylidene 13, TS-3**

|   |             |             |             |
|---|-------------|-------------|-------------|
| C | -3.91941400 | -0.30031400 | -0.27164900 |
| C | -1.88627900 | -1.00862900 | -0.73502100 |
| C | -1.74160300 | 0.11669700  | 0.05136300  |
| N | -3.05446200 | 0.53268800  | 0.32340400  |
| H | -4.99427300 | -0.22163600 | -0.23167800 |
| H | -1.13666200 | -1.67588300 | -1.12590800 |
| N | -3.23519700 | -1.24210500 | -0.92588900 |
| C | -3.49486100 | 1.70196000  | 1.10045000  |
| H | -2.96247000 | 2.58558000  | 0.75565100  |
| H | -4.57157300 | 1.81305700  | 0.94575800  |
| H | -3.26206600 | 1.55556600  | 2.15277400  |
| C | -3.81012900 | -2.34532600 | -1.68779100 |
| H | -3.45949500 | -2.30165100 | -2.72196500 |
| H | -3.51254900 | -3.29814500 | -1.24231900 |
| H | -4.89819300 | -2.26437700 | -1.67205100 |
| C | -0.53090400 | 0.74786100  | 0.62361400  |
| O | -0.85755000 | 1.64689200  | 1.62170000  |
| C | 0.44591800  | 1.31631300  | -0.38078500 |
| C | 0.65976900  | 0.80355000  | -1.67039000 |
| C | 1.22248000  | 2.41800000  | 0.01860300  |
| C | 1.60474500  | 1.36874200  | -2.52671700 |
| H | 0.08423600  | -0.04342400 | -2.02942300 |
| C | 2.16956100  | 2.98057200  | -0.83530200 |
| H | 1.05794700  | 2.82845300  | 1.00770500  |
| C | 2.36782600  | 2.46191700  | -2.11601500 |
| H | 1.74426500  | 0.94849800  | -3.52022200 |
| H | 2.75362600  | 3.83359000  | -0.49714500 |
| H | 3.10552000  | 2.90091500  | -2.78283200 |
| H | -0.32808400 | 1.18867800  | 2.43582900  |
| C | 0.26819000  | -0.58409200 | 1.73396300  |
| O | 0.48160900  | 0.09806900  | 2.82693100  |
| H | -0.56716900 | -1.32411000 | 1.75882500  |
| C | 1.45705900  | -1.19581500 | 1.03868500  |
| C | 2.72401900  | -0.60876700 | 1.16232900  |
| C | 1.33894600  | -2.37487600 | 0.29082700  |
| C | 3.83047800  | -1.16548000 | 0.52574000  |
| H | 2.81533100  | 0.27897100  | 1.77923400  |
| C | 2.44575300  | -2.93711400 | -0.34995800 |
| H | 0.37448600  | -2.88003300 | 0.24371400  |
| C | 3.69646700  | -2.32856800 | -0.23962200 |
| H | 4.80590200  | -0.69559900 | 0.62915200  |
| H | 2.33542100  | -3.85784900 | -0.91917700 |
| H | 4.56281000  | -2.76415200 | -0.73150500 |

**Table S106. Cartesien coordinates of imidazole-5-ylidene 13, IM-3**

|   |             |             |             |
|---|-------------|-------------|-------------|
| C | -3.99941400 | -0.17598700 | -0.28374700 |
| C | -2.53363100 | 1.10789800  | 0.75210200  |
| C | -1.81990100 | 0.24345600  | -0.03842300 |
| N | -2.77682300 | -0.54827500 | -0.67226600 |
| H | -4.92764800 | -0.61109800 | -0.61975800 |
| H | -2.19584300 | 1.93067000  | 1.35981500  |
| N | -3.88329700 | 0.83439900  | 0.58718000  |
| C | -2.47874400 | -1.55297000 | -1.70007600 |
| H | -2.08786400 | -2.45702700 | -1.22892800 |
| H | -3.39496600 | -1.77532100 | -2.25118900 |
| H | -1.70677900 | -1.09841900 | -2.33130800 |
| C | -4.98481400 | 1.54374300  | 1.22767000  |
| H | -4.90298800 | 1.45489000  | 2.31413300  |
| H | -4.95796200 | 2.59975700  | 0.94661300  |

|   |             |             |             |
|---|-------------|-------------|-------------|
| H | -5.93139700 | 1.10882400  | 0.90228800  |
| C | -0.33285600 | 0.19074400  | -0.47050400 |
| O | -0.32058500 | 0.41850400  | -1.80239900 |
| C | 0.27449400  | -1.15428100 | -0.02186800 |
| C | 0.08201700  | -1.68484300 | 1.26082300  |
| C | 1.06483300  | -1.86335500 | -0.93143900 |
| C | 0.67041200  | -2.89669900 | 1.62844900  |
| H | -0.53485300 | -1.14968900 | 1.98107300  |
| C | 1.65712800  | -3.07296100 | -0.56672500 |
| H | 1.19192200  | -1.43618600 | -1.92091100 |
| C | 1.46199700  | -3.59513500 | 0.71416800  |
| H | 0.51085600  | -3.29528900 | 2.62791500  |
| H | 2.27379700  | -3.61049900 | -1.28353200 |
| H | 1.92145800  | -4.53875300 | 0.99810900  |
| H | -0.29418800 | 2.15849800  | -1.31133400 |
| C | 0.39023500  | 1.42041700  | 0.25500000  |
| O | -0.11252300 | 2.56193000  | -0.41619100 |
| H | 0.09236300  | 1.47146700  | 1.31261500  |
| C | 1.90474900  | 1.34197800  | 0.19797200  |
| C | 2.58204600  | 1.50004900  | -1.01992200 |
| C | 2.65529400  | 1.12430800  | 1.35814400  |
| C | 3.97353300  | 1.43404400  | -1.06954900 |
| H | 2.00322600  | 1.65667000  | -1.92322000 |
| C | 4.04958800  | 1.06034500  | 1.31236700  |
| H | 2.14275200  | 1.00495000  | 2.31101000  |
| C | 4.71390100  | 1.21573800  | 0.09575200  |
| H | 4.48458400  | 1.55557600  | -2.02196500 |
| H | 4.61443800  | 0.89452600  | 2.22680600  |
| H | 5.79961100  | 1.17117500  | 0.05494200  |

**Table S107. Cartesian coordinates of imidazole-5-ylidene 13, TS-4**

|   |             |             |             |
|---|-------------|-------------|-------------|
| C | 4.28891500  | -0.05492900 | -0.33688600 |
| C | 2.82402600  | -1.13696900 | 0.90406500  |
| C | 2.08992000  | -0.17495200 | 0.24568500  |
| N | 3.06958600  | 0.47272400  | -0.52228400 |
| H | 5.20991000  | 0.25682700  | -0.80681300 |
| H | 2.50100600  | -1.91268200 | 1.58331900  |
| N | 4.16997500  | -1.05533700 | 0.54502500  |
| C | 2.77852300  | 1.56922300  | -1.44413700 |
| H | 2.48351000  | 2.45776300  | -0.88081800 |
| H | 3.66613500  | 1.79125300  | -2.04233600 |
| H | 1.95167300  | 1.26271300  | -2.08771500 |
| C | 5.25026400  | -1.91280300 | 1.01332100  |
| H | 5.33956100  | -1.84182000 | 2.10110700  |
| H | 5.04852100  | -2.95184500 | 0.73765700  |
| H | 6.19190600  | -1.59944500 | 0.55814100  |
| C | -0.09363200 | -0.04604400 | -0.62119700 |
| O | 0.12173100  | -0.21413300 | -1.83648900 |
| C | -0.47229200 | 1.31665100  | -0.09887200 |
| C | -0.38370900 | 1.67247800  | 1.25391600  |
| C | -0.98714800 | 2.24564300  | -1.01115700 |
| C | -0.80199600 | 2.92979400  | 1.68340800  |
| H | 0.05296700  | 0.97336800  | 1.96022000  |
| C | -1.40553300 | 3.50668500  | -0.58268400 |
| C | -1.05837400 | 1.95783300  | -2.05533000 |
| H | -1.31574500 | 3.85210400  | 0.76599000  |
| H | -0.72100300 | 3.19597900  | 2.73445800  |
| H | -1.80649900 | 4.21664500  | -1.30194200 |
| H | -1.64100800 | 4.83322200  | 1.10282000  |
| H | 0.27861700  | -2.08906400 | -1.33713800 |
| C | -0.57071600 | -1.30253600 | 0.16021600  |
| O | 0.00383800  | -2.43426100 | -0.46061000 |
| C | -0.23155500 | -1.25123800 | 1.19923200  |
| C | -2.09679800 | -1.36900200 | 0.14597900  |
| C | -2.78130700 | -1.66363400 | -1.04058400 |
| C | -2.83680000 | -1.13927500 | 1.30990200  |
| C | -4.17338500 | -1.72453400 | -1.05985100 |
| H | -2.21251900 | -1.84607400 | -1.94712800 |
| C | -4.23204600 | -1.20011500 | 1.29501600  |
| H | -2.31699300 | -0.91539900 | 2.23914700  |
| C | -4.90472900 | -1.49284800 | 0.10863700  |
| H | -4.69068900 | -1.95437900 | -1.98825500 |
| H | -4.79098000 | -1.02406400 | 2.21088600  |
| H | -5.99054700 | -1.54376900 | 0.09350200  |

**Table S108. Cartesian coordinates of pyrrolidine-2-ylidene 14**

|   |             |             |             |
|---|-------------|-------------|-------------|
| C | -0.22898300 | -1.03014800 | -0.10100400 |
| C | 0.99588600  | -0.11185300 | -0.02252200 |
| C | 0.46975600  | 1.34000200  | -0.27758500 |
| C | -1.02476200 | 1.24494100  | 0.03469300  |
| H | 0.97779800  | 2.09531600  | 0.33096100  |
| H | 0.61598400  | 1.61255900  | -1.32915700 |
| H | -1.28531800 | 1.59089200  | 1.04423100  |
| H | -1.66663800 | 1.78089000  | -0.67439000 |
| C | 1.56270700  | -0.25757400 | 1.40780300  |
| H | 1.79644800  | -1.30469500 | 1.62544300  |
| H | 2.48053400  | 0.33353000  | 1.51771300  |
| H | 0.84646300  | 0.08757200  | 2.16371400  |
| C | 2.05762600  | -0.53532000 | -1.04806600 |
| H | 2.93576100  | 0.12162600  | -0.99754100 |
| H | 2.38396000  | -1.56385000 | -0.86258200 |
| H | 1.66048700  | -0.49147600 | -2.06917200 |
| N | -1.26707400 | -0.22485300 | -0.06008500 |
| C | -2.64735800 | -0.69229100 | -0.03448700 |
| H | -3.14259500 | -0.37596300 | 0.89246900  |
| H | -3.20895400 | -0.27853100 | -0.88147000 |
| H | -2.63365200 | -1.78044300 | -0.09261900 |

**Table S109. Cartesien coordinates of pyrrolidine-2-ylidene 14, TS-1**

|   |             |             |             |
|---|-------------|-------------|-------------|
| C | -1.07598500 | 0.18068800  | 0.18567800  |
| C | -1.85992400 | -1.12171300 | 0.03143000  |
| C | -3.28379900 | -0.64667600 | -0.39768000 |
| C | -3.03986700 | 0.72945600  | -1.01780400 |
| H | -3.76866800 | -1.34170400 | -1.08946900 |
| H | -3.92576400 | -0.54887600 | 0.48483200  |
| H | -2.92089700 | 0.70581400  | -2.10843500 |
| H | -3.80429200 | 1.47528600  | -0.77779500 |
| C | -1.18850900 | -1.93258400 | -1.10451500 |
| H | -0.14296300 | -2.14984100 | -0.87014500 |
| H | -1.72012400 | -2.88147600 | -1.24373000 |
| H | -1.20958900 | -1.38997400 | -2.05687300 |
| C | -1.90094300 | -1.95737200 | 1.31960400  |
| H | -2.54630700 | -2.83239900 | 1.17516900  |
| H | -0.90520500 | -2.31634900 | 1.59665900  |
| H | -2.29780900 | -1.37865200 | 2.16096300  |
| N | -1.74518600 | 1.13042600  | -0.40224000 |
| C | -1.27920000 | 2.51061500  | -0.56909100 |
| H | -0.89777600 | 2.64505800  | -1.58733500 |
| H | -2.12364200 | 3.18958900  | -0.41549800 |
| H | -0.49848000 | 2.69232200  | 0.17550200  |
| C | 0.43894100  | 0.65275000  | 1.40695500  |
| H | 0.13109900  | -0.13890600 | 2.12839600  |
| O | 0.33251400  | 1.85888700  | 1.74494100  |
| C | 1.63152700  | 0.19297200  | 0.57695600  |
| C | 2.04035300  | -1.14544700 | 0.55996100  |
| C | 2.38255300  | 1.13641000  | -0.13171700 |
| C | 3.15293900  | -1.54404100 | -0.18293200 |
| H | 1.49133200  | -1.87977700 | 1.14805500  |
| C | 3.49212600  | 0.74314200  | -0.87984700 |
| H | 2.09179700  | 2.18046200  | -0.06140100 |
| C | 3.87796000  | -0.59957100 | -0.91358100 |
| C | 3.46143300  | -2.58689300 | -0.18299900 |
| H | 4.06638900  | 1.48585500  | -1.42900600 |
| H | 4.74661500  | -0.90539200 | -1.49124500 |

**Table S110. Cartesien coordinates of pyrrolidine-2-ylidene 14, IM-1**

|   |             |             |             |
|---|-------------|-------------|-------------|
| C | -1.02661900 | 0.19812800  | 0.24736700  |
| C | -1.79904100 | -1.10597600 | 0.00215500  |
| C | -3.18973100 | -0.57747200 | -0.44942500 |
| C | -2.87846100 | 0.78520700  | -1.06687700 |
| H | -3.68856700 | -1.25632900 | -1.14670800 |
| H | -3.83989300 | -0.44878400 | 0.42316900  |
| H | -2.69158000 | 0.74374300  | -2.14724200 |
| H | -3.64356300 | 1.54650700  | -0.88661800 |
| C | -1.12077800 | -1.87006200 | -1.16371500 |
| H | -0.09168500 | -2.14137100 | -0.91982400 |
| H | -1.68417400 | -2.78727500 | -1.37138000 |
| H | -1.09632600 | -1.27231600 | -2.08211600 |
| C | -1.91382600 | -2.01563100 | 1.23399900  |
| H | -2.59204800 | -2.84795000 | 1.01020600  |
| H | -0.94704200 | -2.44003200 | 1.51905800  |
| H | -2.31359300 | -1.47412700 | 2.09786300  |
| N | -1.63346000 | 1.17732600  | -0.37413500 |
| C | -1.15203900 | 2.55771500  | -0.45261900 |
| H | -0.52540900 | 2.67939600  | -1.34225500 |
| H | -2.01550000 | 3.22494800  | -0.52222900 |
| H | -0.55889900 | 2.70038400  | 0.47013000  |
| C | 0.16969900  | 0.44666400  | 1.25684400  |
| C | -0.00015400 | -0.39425700 | 1.98035400  |
| O | 0.12049100  | 1.64407400  | 1.80171800  |
| C | 1.48974200  | 0.08465000  | 0.50940900  |
| C | 1.98733200  | -1.22086000 | 0.41962700  |
| C | 2.25075800  | 1.12873400  | -0.02608600 |
| C | 3.19434100  | -1.48635300 | -0.23176500 |
| H | 1.44349800  | -2.03988100 | 0.88896400  |
| C | 3.45319300  | 0.86974600  | -0.68446000 |
| H | 1.89788400  | 2.14350300  | 0.13082900  |
| C | 3.92631300  | -0.44031400 | -0.79710700 |
| H | 3.57065400  | -2.50555500 | -0.28305200 |
| H | 4.03303500  | 1.69241200  | -1.09714500 |
| H | 4.86834600  | -0.64194200 | -1.30088700 |

**Table S111. Cartesien coordinates of pyrrolidine-2-ylidene 14, TS-2**

|   |             |             |             |
|---|-------------|-------------|-------------|
| C | 0.81794200  | -1.18861700 | -0.20744500 |
| C | 1.34792900  | -1.48206600 | 1.20589900  |
| C | 1.13549000  | -3.01819200 | 1.29857100  |
| C | 1.22608700  | -3.49718700 | -0.14755700 |
| H | 1.86807000  | -3.49868100 | 1.95300900  |
| H | 0.13528500  | -3.22662800 | 1.69257500  |
| H | 2.24064900  | -3.79106500 | -0.44887600 |
| H | 0.55262100  | -4.32796600 | -0.38267600 |
| C | 2.85601100  | -1.14241200 | 1.28353300  |
| C | 3.02985700  | -0.07416800 | 1.13606500  |
| H | 3.23698700  | -1.42085700 | 2.27288200  |
| H | 3.43945900  | -1.68782200 | 0.53194400  |
| C | 0.57330800  | -0.75494800 | 2.31592500  |
| H | 0.87174500  | -1.16178300 | 3.28938500  |
| H | 0.78628000  | 0.31713000  | 2.32163100  |
| H | -0.50628300 | -0.89137700 | 2.19456300  |
| N | 0.81739900  | -2.30789900 | -0.91669700 |
| C | 0.54809900  | -2.49036600 | -2.34303600 |
| H | 1.45534300  | -2.87399800 | -2.82505100 |
| H | -0.25187300 | -3.22943200 | -2.46144400 |
| H | 0.24525600  | -1.53812000 | -2.77078800 |
| C | 0.21072900  | 0.08793400  | -0.58821000 |

|   |             |             |             |
|---|-------------|-------------|-------------|
| H | -0.77625300 | 0.07301700  | 0.08948800  |
| O | -0.41310300 | 0.12232400  | -1.85879800 |
| C | 1.03813400  | 1.33639400  | -0.34119700 |
| C | 0.55392100  | 2.37026200  | 0.46975600  |
| C | 2.26061300  | 1.52032800  | -1.00399600 |
| C | 1.28114400  | 3.55124600  | 0.63084900  |
| H | -0.40191200 | 2.24890100  | 0.97156400  |
| C | 2.98904300  | 2.69971700  | -0.84735100 |
| H | 2.63674900  | 0.73568500  | -1.65655400 |
| C | 2.50164600  | 3.71811800  | -0.02502700 |
| H | 0.89070700  | 4.34226000  | 1.26577400  |
| H | 3.93450400  | 2.82509300  | -1.36895900 |
| H | 3.06771600  | 4.63756300  | 0.09879800  |
| H | -1.36968800 | -0.03889600 | -1.55911800 |
| O | -2.25126600 | -0.33349000 | -0.14055100 |
| C | -3.41082700 | 0.38806400  | 0.14451200  |
| C | -4.62165000 | -0.45286400 | -0.32458800 |
| H | -4.61329800 | -1.42569000 | 0.18048400  |
| H | -5.58160300 | 0.03961800  | -0.11816000 |
| H | -4.55178500 | -0.63466800 | -1.40361700 |
| C | -3.42719200 | 1.74853700  | -0.58968200 |
| H | -4.34266200 | 2.32175200  | -0.39022600 |
| H | -2.57030600 | 2.36089200  | -0.28280500 |
| H | -3.35300500 | 1.59434900  | -1.67318600 |
| C | -3.52348700 | 0.62698300  | 1.66754600  |
| H | -3.48751900 | -0.33356800 | 2.19540500  |
| H | -2.68094300 | 1.23657500  | 2.02013700  |
| H | -4.45258800 | 1.14092700  | 1.94841300  |

**Table S112. Cartesian coordinates of pyrrolidine-2-ylidene 14, IM-2**

|   |             |             |             |
|---|-------------|-------------|-------------|
| C | 1.02920600  | 0.24802500  | -0.00104900 |
| C | 1.36087800  | -1.22706300 | -0.23727100 |
| C | 2.68103700  | -1.05537500 | -1.04545600 |
| C | 3.36384300  | 0.15496800  | -0.40772700 |
| H | 3.30525000  | -1.95498600 | -1.01972000 |
| H | 2.43785000  | -0.84330900 | -2.09343700 |
| H | 3.96219000  | -0.14944800 | 0.46663000  |
| H | 4.03700400  | 0.68364800  | -1.09380000 |
| C | 1.65623700  | -1.96999000 | 1.08759500  |
| O | 0.75008800  | -2.07175300 | 1.69342000  |
| H | 2.03739200  | -2.97900100 | 0.88387600  |
| H | 2.40190600  | -1.44572800 | 1.69513900  |
| C | 0.34439000  | -2.02447100 | -1.06733500 |
| H | 0.78714000  | -2.98324600 | -1.36524000 |
| H | -0.57213900 | -2.24021600 | -0.51331200 |
| H | 0.06604500  | -1.48101900 | -1.97649900 |
| N | 2.24698500  | 1.01950900  | 0.00415400  |
| C | 2.52909000  | 1.81868100  | 1.19981300  |
| H | 2.74007800  | 1.19337000  | 2.08384000  |
| H | 3.40427900  | 2.45062100  | 1.01089000  |
| H | 1.67932400  | 2.46605100  | 1.42737500  |
| C | -0.13770100 | 0.93954400  | -0.07587400 |
| O | -0.07942700 | 2.31188200  | -0.24904600 |
| C | -1.52224100 | 0.44745100  | 0.01822800  |
| C | -2.51950100 | 1.01865400  | -0.79365500 |
| C | -1.90084900 | -0.54126000 | 0.94129500  |
| C | -3.83861200 | 0.58029800  | -0.71531300 |
| H | -2.24399200 | 1.80789500  | -1.48534500 |
| C | -3.22166900 | -0.98357300 | 1.01490400  |
| H | -1.15743900 | -0.94103100 | 1.62356100  |
| C | -4.19590300 | -0.42825800 | 0.18402700  |
| H | -4.59261100 | 1.02787100  | -1.35792000 |
| H | -3.49262100 | -1.74956200 | 1.73708400  |
| H | -5.22671400 | -0.76679600 | 0.24630800  |
| H | 0.81425600  | 2.47923800  | -0.61265500 |

**Table S113. Cartesian coordinates of pyrrolidine-2-ylidene 4, TS-3**

|   |             |             |             |
|---|-------------|-------------|-------------|
| C | 1.74503800  | -0.22453300 | -0.08894500 |
| C | 2.15023900  | 0.22343500  | 1.33512500  |
| C | 3.21073800  | -0.84363000 | 1.71123400  |
| C | 3.80857600  | -1.26038900 | 0.37486500  |
| H | 3.95606700  | -0.45301100 | 2.40996000  |
| H | 2.71918400  | -1.70014300 | 2.18625500  |
| H | 4.70847800  | -0.69185500 | 0.10467000  |
| H | 4.05524200  | -2.32552000 | 0.30827300  |
| C | 2.81431200  | 1.61808800  | 1.18708800  |
| H | 2.09628700  | 2.35449200  | 0.81680600  |
| H | 3.17888600  | 1.95199300  | 2.16546900  |
| H | 3.66509300  | 1.59671900  | 0.49662000  |
| C | 1.07881200  | 0.29296100  | 2.43183500  |
| H | 1.58728800  | 0.40273400  | 3.39748500  |
| H | 0.41451000  | 1.14717300  | 2.30689800  |
| H | 0.47234000  | -0.61587000 | 2.47805300  |
| N | 2.74010300  | -0.94741300 | -0.58851500 |
| C | 2.97075500  | -1.40796700 | -1.96335600 |
| H | 3.99206600  | -1.12535500 | -2.24439400 |
| H | 2.87612500  | -2.49782500 | -1.99556500 |
| H | 2.23366900  | -0.94117300 | -2.61039500 |
| C | 0.47965600  | 0.03470900  | -0.83308400 |
| O | 0.47859700  | -0.19848100 | -2.13265100 |
| C | -0.23680400 | 1.34812300  | -0.48645900 |
| C | 0.08419400  | 2.42628300  | -1.33296500 |
| C | -1.19029800 | 1.56918500  | 0.51475100  |
| C | -0.49324200 | 3.68235700  | -1.16100200 |
| H | 0.78104900  | 2.25218000  | -2.14603000 |
| C | -1.78120900 | 2.82626100  | 0.68185600  |
| H | -1.50361300 | 0.76102500  | 1.16146900  |
| C | -1.43168200 | 3.88987900  | -0.14702200 |
| H | -0.21882100 | 4.49679800  | -1.82713000 |



|   |             |             |             |
|---|-------------|-------------|-------------|
| H | -2.52750100 | 2.96301500  | 1.46057900  |
| H | -1.89235000 | 4.86551500  | -0.01432200 |
| H | 0.16478400  | -1.67085900 | -1.98256200 |
| C | -0.29669600 | -1.64725100 | -0.17114400 |
| O | 0.03842500  | -2.40107100 | -1.25705100 |
| H | 0.22274300  | -1.98705400 | 0.73158000  |
| C | -1.76435400 | -1.49248300 | 0.06362400  |
| C | -2.62540000 | -1.16450000 | -0.99638500 |
| C | -2.31472000 | -1.71670200 | 1.33403600  |
| C | -3.99633900 | -1.04915400 | -0.78122200 |
| C | -2.20391700 | -0.98538600 | -1.98036400 |
| C | -3.68937400 | -1.60466000 | 1.54889400  |
| H | -1.66149800 | -1.99878400 | 2.15813500  |
| C | -4.53494400 | -1.26802700 | 0.49059800  |
| H | -4.65043800 | -0.78782200 | -1.60926000 |
| H | -4.09982300 | -1.79168100 | 2.53821600  |
| H | -5.60629800 | -1.18290300 | 0.65282800  |

**Table S114. Cartesian coordinates of pyrrolidine-2-ylidene 14, IM-3**

|   |             |             |             |
|---|-------------|-------------|-------------|
| C | 1.74019000  | -0.46526000 | -0.06717400 |
| C | 2.40628200  | 0.16346400  | 1.18502200  |
| C | 3.62551700  | -0.77101000 | 1.40466000  |
| C | 3.93635200  | -1.29598500 | 0.01264400  |
| H | 4.46896500  | -0.24782900 | 1.86309400  |
| H | 3.34366300  | -1.60195200 | 2.06062400  |
| H | 4.66422600  | -0.68751200 | -0.53821600 |
| H | 4.27481900  | -2.33574300 | -0.01452000 |
| C | 2.89570800  | 1.58917900  | 0.81408000  |
| H | 2.05994900  | 2.26036500  | 0.61340700  |
| H | 3.47298300  | 1.99235900  | 1.65402500  |
| H | 3.54388000  | 1.58307000  | -0.06985200 |
| C | 1.56575300  | 0.22888100  | 2.46834400  |
| H | 2.20566400  | 0.59868400  | 3.27865400  |
| H | 0.72173000  | 0.91169800  | 2.37451300  |
| H | 1.19527800  | -0.75724400 | 2.76467100  |
| N | 2.63087100  | -1.20140200 | -0.67868600 |
| C | 2.53310800  | -1.94280600 | -1.94800900 |
| C | 3.47557500  | -1.79882000 | -2.48584100 |
| H | 2.40625400  | -3.00407300 | -1.71379100 |
| H | 1.66603500  | -1.55394500 | -2.48377600 |
| C | 0.25800300  | -0.28601600 | -0.62836100 |
| O | 0.14502700  | -0.65595300 | -1.90982500 |
| C | -0.13645700 | 1.20509000  | -0.44741700 |
| C | 0.23048000  | 2.06651300  | -1.49293000 |
| C | -0.85899800 | 1.73990700  | 0.62585700  |
| C | -0.07186900 | 3.42588100  | -1.44695100 |
| H | 0.72967100  | 1.63246300  | -2.35294800 |
| C | -1.17614300 | 3.10174700  | 0.66977000  |
| H | -1.21929000 | 1.09608500  | 1.42050200  |
| C | -0.77439100 | 3.95237200  | -0.35907500 |
| H | 0.22785600  | 4.07420300  | -2.26702200 |
| H | -1.75152200 | 3.49048900  | 1.50639800  |
| H | -1.02189400 | 5.01032800  | -0.32435100 |
| H | -0.17984600 | -2.31740700 | -1.27975300 |
| O | -0.57429900 | -1.35484500 | 0.26119800  |
| C | -0.23592500 | -2.60055800 | -0.32731700 |
| H | -0.24032400 | -1.39066000 | 1.30349400  |
| C | -2.08010700 | -1.13550500 | 0.25368000  |
| C | -2.78436700 | -0.88153900 | -0.93413700 |
| C | -2.80063200 | -1.25283300 | 1.44877600  |
| C | -4.17097200 | -0.74031100 | -0.91398400 |
| H | -2.22311900 | -0.77939600 | -1.85730200 |
| C | -4.19036600 | -1.11495900 | 1.46911200  |
| C | -2.26891300 | -1.46402300 | 2.37530500  |
| C | -4.88028100 | -0.85691600 | 0.28482100  |
| H | -4.70254600 | -0.53696800 | -1.84056400 |
| H | -4.73096000 | -1.21351700 | 2.40748800  |
| H | -5.96209300 | -0.74904300 | 0.29413800  |

**Table S115. Cartesian coordinates of pyrrolidine-2-ylidene 14, TS-4**

|   |             |             |             |
|---|-------------|-------------|-------------|
| C | 1.82861600  | -0.58166800 | -0.03430500 |
| C | 2.57298400  | -0.03112400 | 1.19619800  |
| C | 3.82690100  | -0.95059200 | 1.29980100  |
| C | 4.03121900  | -1.44898700 | -0.12561200 |
| H | 4.69956800  | -0.42247300 | 1.69452000  |
| H | 3.61635800  | -1.79681000 | 1.96328900  |
| H | 4.73107200  | -0.84084700 | -0.71225900 |
| H | 4.34620500  | -2.49445900 | -0.19993500 |
| C | 3.00261600  | 1.42626900  | 0.89024100  |
| C | 2.13840400  | 2.07739400  | 0.74745300  |
| H | 3.59041500  | 1.81047400  | 1.73235500  |
| C | 3.62412900  | 1.48695900  | -0.01082900 |
| C | 1.75984500  | -0.06983200 | 2.49796500  |
| H | 2.39748200  | 0.24514700  | 3.33317500  |
| H | 0.90423900  | 0.60795900  | 2.45856700  |
| H | 1.39826500  | -1.08054000 | 2.71578000  |
| N | 2.67132500  | -1.30562000 | -0.71404800 |
| C | 2.43610300  | -1.99545200 | -1.98832800 |
| H | 3.27905800  | -1.78446600 | -2.65461200 |
| H | 2.39400400  | -3.07345000 | -1.80035200 |
| C | 1.49822400  | -1.63917600 | -2.41206500 |
| H | -0.03115000 | -0.26361900 | -0.73580700 |
| O | -0.08095400 | -0.66219400 | -1.94818200 |
| C | -0.14638600 | 1.24160200  | -0.52065500 |
| C | 0.28030600  | 2.07675300  | -1.56265400 |
| C | -0.68671800 | 1.82971400  | 0.63018000  |
| C | 0.20903100  | 3.46295000  | -1.44331400 |
| H | 0.65245200  | 1.60918000  | -2.46864400 |
| C | -0.76817700 | 3.21992100  | 0.74909200  |

|   |             |             |             |
|---|-------------|-------------|-------------|
| H | -1.07545300 | 1.20913700  | 1.43098300  |
| C | -0.31163400 | 4.04157600  | -0.28209300 |
| H | 0.55015700  | 4.09489900  | -2.25984600 |
| H | -1.19962700 | 3.65841700  | 1.64547200  |
| H | -0.37464200 | 5.12274500  | -0.18890700 |
| H | -0.40963200 | -2.41877800 | -1.16314800 |
| C | -0.78216800 | -1.22505800 | 0.24264400  |
| O | -0.45751700 | -2.54191500 | -0.18872900 |
| H | -0.41760200 | -1.12827300 | 1.26847700  |
| C | -2.29375900 | -1.00664500 | 0.25275000  |
| C | -3.02661900 | -0.81597200 | -0.92860000 |
| C | -2.98608300 | -1.04713500 | 1.46958900  |
| C | -4.41235600 | -0.66628300 | -0.88536100 |
| H | -2.49721300 | -0.77251400 | -1.87494900 |
| C | -4.37357800 | -0.89849200 | 1.51519700  |
| H | -2.43218000 | -1.20572000 | 2.39336000  |
| C | -5.09182700 | -0.70690700 | 0.33477000  |
| H | -4.96475100 | -0.51392700 | -1.80944200 |
| H | -4.89123400 | -0.93505300 | 2.47070600  |
| H | -6.17219900 | -0.58970900 | 0.36428900  |

**Table S116. Cartesian coordinates of 1,2,3-triazole-5-ylidene 15**

|   |             |             |             |
|---|-------------|-------------|-------------|
| C | 0.64032900  | 1.26469000  | -0.00530100 |
| C | -0.75745300 | 1.35876100  | 0.01077700  |
| N | -1.04988800 | 0.01001000  | 0.00754400  |
| H | 1.39624500  | 2.03799200  | -0.01188000 |
| N | 1.01816900  | -0.05035000 | -0.02084400 |
| C | -2.39066100 | -0.56127200 | 0.00238200  |
| H | -2.56579500 | -1.11373700 | -0.92550000 |
| H | -2.51770900 | -1.23734400 | 0.85248200  |
| H | -3.08353800 | 0.27516100  | 0.07650600  |
| C | 2.35650300  | -0.62381200 | 0.01373900  |
| H | 3.04881700  | 0.07829400  | -0.45478100 |
| H | 2.66639300  | -0.80820400 | 1.04664300  |
| H | 2.35306000  | -1.56389400 | -0.53919400 |
| N | -0.02396500 | -0.85944100 | -0.01153700 |

**Table S117. Cartesian coordinates of 1,2,3-triazole-5-ylidene 15, TS-1**

|   |             |             |             |
|---|-------------|-------------|-------------|
| C | -2.02305600 | -0.92169600 | -0.12330400 |
| C | -1.00533600 | -0.09312600 | -0.55831700 |
| N | -1.46858300 | 1.14499600  | -0.20467500 |
| H | -2.06966800 | -1.99774500 | -0.19516300 |
| N | -2.98016100 | -0.13488100 | 0.43178700  |
| C | -0.81261800 | 2.42909600  | -0.43508300 |
| H | -1.30456400 | 3.18099000  | 0.18185700  |
| H | 0.23964100  | 2.33293800  | -0.16375200 |
| H | -0.89458700 | 2.69987700  | -1.49108300 |
| C | -4.23361400 | -0.53348400 | 1.06398200  |
| H | -4.76857000 | -1.21689900 | 0.40140600  |
| H | -4.02750600 | -1.02953000 | 2.01591000  |
| H | -4.82687000 | 0.36456800  | 1.23309500  |
| N | -2.66212000 | 1.15018600  | 0.39599500  |
| C | 0.41425400  | -0.99136400 | -1.29739100 |
| O | 0.42107400  | -0.48480900 | -2.29699000 |
| H | 0.10890400  | -2.21961400 | -1.22142700 |
| C | 1.59465500  | -0.46796600 | -0.46646600 |
| C | 2.29893200  | 0.68787100  | -0.81996700 |
| C | 2.00449100  | -1.19452000 | 0.65538500  |
| C | 3.37694500  | 1.13126400  | -0.04817000 |
| H | 2.01549500  | 1.23112900  | -1.72183900 |
| C | 3.07688000  | -0.75551900 | 1.43069400  |
| H | 1.47170200  | -2.11456200 | 0.87893300  |
| C | 3.76389100  | 0.41269900  | 1.08513300  |
| H | 3.92338000  | 2.02591900  | -0.33888100 |
| H | 3.38774100  | -1.32786700 | 2.30205200  |
| H | 4.60500800  | 0.75125900  | 1.68516200  |

**Table S118. Cartesian coordinates of 1,2,3-triazole-5-ylidene 15, IM-1**

|   |             |             |             |
|---|-------------|-------------|-------------|
| C | 1.97945300  | 0.96610900  | -0.11126700 |
| C | 0.98090400  | 0.10572400  | -0.52184100 |
| N | 1.44478000  | -1.12311000 | -0.14237800 |
| H | 2.01423700  | 2.03492300  | -0.24841100 |
| N | 2.93564100  | 0.20040800  | 0.47096600  |
| C | 0.80008300  | -2.41917200 | -0.33331500 |
| H | 1.43862500  | -3.17977100 | 0.11484500  |
| H | -0.18116500 | -2.40162400 | 0.14409100  |
| H | 0.67812200  | -2.60577900 | -1.40283800 |
| C | 4.19034500  | 0.62542600  | 1.08297500  |
| H | 4.73474400  | 1.26254100  | 0.38290500  |
| H | 3.98406800  | 1.17898000  | 2.00240500  |
| H | 4.77262300  | -0.26751800 | 1.30783500  |
| N | 2.63429100  | -1.09062900 | 0.46018300  |
| C | -0.27675300 | 0.67064400  | -1.32516500 |
| H | -0.32423600 | -0.01449100 | -2.22847200 |
| O | -0.05078000 | 1.93914800  | -1.53337800 |
| C | -1.53465800 | 0.32526000  | -0.47651900 |
| C | -2.28258800 | -0.84319400 | -0.65282700 |
| C | -1.95512200 | 1.25734300  | 0.47764400  |
| C | -3.41208600 | -1.09630000 | 0.13307000  |
| H | -2.00230000 | -1.54704700 | -1.43689400 |
| C | -3.07538800 | 1.00860900  | 1.26845000  |
| H | -1.39369100 | 2.18524200  | 0.54484300  |
| C | -3.80539100 | -0.17373300 | 1.10350800  |
| H | -3.99262300 | -2.00294400 | -0.02413600 |
| H | -3.39241700 | 1.74092200  | 2.00804100  |

H -4.68552500 -0.36360900 1.71312600

**Table S119. Cartesian coordinates of 1,2,3-triazole-5-ylidene 15, TS-2**

|   |             |             |             |
|---|-------------|-------------|-------------|
| C | 1.36679800  | 1.81107600  | -0.16283600 |
| C | 0.06671900  | 1.33826000  | -0.31787600 |
| N | -0.70413500 | 2.45647400  | -0.08462500 |
| H | 2.27924100  | 1.23070700  | -0.22329100 |
| N | 1.26474100  | 3.11877200  | 0.15495900  |
| C | -2.15751500 | 2.58437700  | -0.15572800 |
| H | -2.39280300 | 3.64830300  | -0.16775500 |
| H | -2.50445900 | 2.09991400  | -1.06911900 |
| H | -2.62036000 | 2.09027900  | 0.70117200  |
| C | 2.34141200  | 4.06976400  | 0.41611700  |
| H | 3.04404900  | 3.62989500  | 1.12635000  |
| H | 2.85756000  | 4.30630900  | -0.51743700 |
| H | 1.89556800  | 4.97060100  | 0.83653300  |
| N | 0.00972100  | 3.53989700  | 0.22572200  |
| C | -0.29650100 | -0.04741900 | -0.66530100 |
| H | 0.78798200  | -0.67345500 | -0.19599800 |
| O | -0.00414300 | -0.27567300 | -2.05155700 |
| C | -1.60630100 | -0.57679200 | -0.21260600 |
| C | -2.01682900 | -0.44524100 | 1.13139000  |
| C | -2.43833400 | -1.30386400 | -1.08303800 |
| C | -3.22110800 | -0.98914800 | 1.57531700  |
| H | -1.36782100 | 0.06602100  | 1.84142600  |
| C | -3.63749600 | -1.85549900 | -0.63242800 |
| H | -2.12142800 | -1.42609300 | -2.11298800 |
| C | -4.04342300 | -1.69760500 | 0.69480000  |
| H | -3.50923200 | -0.87549000 | 2.61805500  |
| H | -4.26273200 | -2.41216100 | -1.32703000 |
| H | -4.97837100 | -2.12929200 | 1.04172400  |
| H | 0.83670600  | -0.78196900 | -2.00426800 |
| O | 2.02703700  | -0.99182200 | -0.39335900 |
| C | 2.44930600  | -2.18787800 | 0.21575400  |
| C | 1.61023700  | -3.37898200 | -0.29336100 |
| H | 1.93412100  | -4.33152200 | 0.14621000  |
| H | 0.55100900  | -3.23554100 | -0.04813700 |
| H | 1.69648500  | -3.45884300 | -1.38359100 |
| C | 3.92848900  | -2.39913900 | -0.16066900 |
| H | 4.53018200  | -1.55352900 | 0.19369700  |
| H | 4.33929300  | -3.32089300 | 0.27181800  |
| H | 4.03188000  | -2.45138600 | -1.25056100 |
| C | 2.31524300  | -2.07783500 | 1.75018700  |
| H | 2.88248500  | -1.21187500 | 2.11298600  |
| H | 1.26410700  | -1.93792000 | 2.03206400  |
| H | 2.68691500  | -2.97255700 | 2.26672800  |

**Table S120. Cartesian coordinates of 1,2,3-triazole-5-ylidene 15, IM-2**

|   |             |             |             |
|---|-------------|-------------|-------------|
| C | 2.29662300  | 0.98727600  | -0.25734100 |
| C | 1.03661300  | 0.37399200  | -0.00871400 |
| N | 1.40298500  | -0.96360800 | 0.25813600  |
| H | 2.53709900  | 2.01080800  | -0.48780900 |
| N | 3.22484700  | 0.02265800  | -0.14483700 |
| C | 0.64600500  | -1.90969900 | 1.05201000  |
| H | 1.33958200  | -2.67054200 | 1.41236300  |
| H | 0.18881200  | -1.38438900 | 1.90002100  |
| H | -0.15596500 | -2.37818100 | 0.47443000  |
| C | 4.65128100  | 0.14691400  | -0.41651500 |
| H | 4.83741100  | 0.08807900  | -1.49224300 |
| H | 4.99988800  | 1.10768100  | -0.03291800 |
| H | 5.16246100  | -0.66915900 | 0.09368300  |
| N | 2.75716200  | -1.16996100 | 0.16326300  |
| O | -0.20705800 | 0.97174900  | 0.04963700  |
| C | -0.13185700 | 2.37732200  | 0.15795300  |
| C | -1.52425900 | 0.37880500  | -0.03109000 |
| C | -1.78524200 | -0.82838800 | -0.72895800 |
| C | -2.64447400 | 1.06717400  | 0.50016100  |
| H | -3.07543000 | -1.33930600 | -0.83321600 |
| C | -0.97042100 | -1.33261000 | -1.24134800 |
| C | -3.93181600 | 0.55376900  | 0.38098700  |
| H | -2.47848300 | 2.00014000  | 1.03076600  |
| C | -4.16232300 | -0.65928900 | -0.27523400 |
| C | -3.23785800 | -2.26525100 | -1.38083800 |
| H | -4.76552200 | 1.10293000  | 0.81340800  |
| H | -5.16889800 | -1.05829700 | -0.36405300 |
| H | -0.72772900 | 2.74862000  | -0.51538500 |

**Table S121. Cartesian coordinates of 1,2,3-triazole-5-ylidene 15, TS-3**

|   |             |             |             |
|---|-------------|-------------|-------------|
| C | -2.34713300 | 0.94855700  | 0.74135900  |
| C | -1.81270600 | 0.03373300  | -0.15776400 |
| N | -2.83303900 | -0.88349000 | -0.31437800 |
| H | -1.92738200 | 1.85180600  | 1.15128600  |
| N | -3.60221300 | 0.52148500  | 1.02859300  |
| C | -2.87957800 | -2.07724300 | -1.17428700 |
| H | -3.11003100 | -1.76601300 | -2.19452300 |
| H | -1.89734100 | -2.56404800 | -1.15760300 |
| H | -3.66634100 | -2.71948300 | -0.77810900 |
| C | -4.57953600 | 1.12934800  | 1.92637100  |
| H | -4.20640400 | 1.09861100  | 2.95291900  |
| H | -4.75481500 | 2.16463900  | 1.62549600  |
| H | -5.50202300 | 0.55547300  | 1.84645400  |
| N | -3.91767500 | -0.58861700 | 0.39187900  |
| C | -0.50155900 | -0.08027300 | -0.82801400 |
| O | -0.68643300 | -0.46512600 | -2.14675200 |
| C | 0.36255200  | 1.14275800  | -0.66578200 |
| C | 0.68044100  | 1.68724600  | 0.59103100  |

|   |             |             |             |
|---|-------------|-------------|-------------|
| C | 0.88886500  | 1.76763400  | -1.80637200 |
| C | 1.47549300  | 2.82831600  | 0.70124400  |
| H | 0.34184000  | 1.19360600  | 1.49772900  |
| C | 1.68994300  | 2.90374600  | -1.69562400 |
| H | 0.65101800  | 1.34543800  | -2.77595900 |
| C | 1.98256100  | 3.44600800  | -0.44292900 |
| H | 1.71448400  | 3.22278800  | 1.68599700  |
| H | 2.08440000  | 3.37045100  | -2.59517700 |
| H | 2.60623700  | 4.33206200  | -0.35778100 |
| H | -0.27954000 | -1.42332600 | -2.12142900 |
| C | 0.26801300  | -1.70637800 | -0.13980100 |
| H | -0.42310100 | -1.91055600 | 0.70643900  |
| O | 0.16752500  | -2.49234600 | -1.18369300 |
| C | 1.65446900  | -1.44372500 | 0.39223900  |
| C | 2.75376700  | -1.46358200 | -0.47575700 |
| C | 1.87925900  | -1.23102100 | 1.75698400  |
| C | 4.04276400  | -1.25205200 | 0.00852900  |
| H | 2.57577800  | -1.66926100 | -1.52662100 |
| C | 3.16973000  | -1.02381900 | 2.24801400  |
| H | 1.03464000  | -1.24720800 | 2.44517400  |
| C | 4.25631100  | -1.02828700 | 1.37231700  |
| H | 4.88718100  | -1.26840300 | -0.67660100 |
| H | 3.32774200  | -0.86877700 | 3.31293900  |
| H | 5.26346900  | -0.86946900 | 1.74974500  |

**Table S122. Cartesian coordinates of 1,2,3-triazole-5-ylidene 15, IM-3**

|   |             |             |             |
|---|-------------|-------------|-------------|
| C | -2.71480300 | 0.72702100  | -0.23726600 |
| C | -1.81763500 | -0.30637400 | -0.00308000 |
| N | -2.63119400 | -1.33453000 | 0.40138300  |
| H | -2.53325900 | 1.72943800  | -0.58955300 |
| N | -3.94989800 | 0.24424100  | 0.02098700  |
| C | -2.28759900 | -2.68763900 | 0.85554600  |
| H | -3.15622600 | -3.32048300 | 0.67450500  |
| H | -1.41508000 | -3.02299800 | 0.28550600  |
| H | -2.06549200 | -2.66313700 | 1.92610900  |
| C | -5.23585200 | 0.91994700  | -0.12459700 |
| H | -5.18949000 | 1.89065700  | 0.37301100  |
| H | -5.46280800 | 1.05586400  | -1.18484600 |
| H | -5.99560300 | 0.29469100  | 0.34294400  |
| N | -3.92859700 | -1.01589400 | 0.41456800  |
| O | -0.32459700 | -0.27368100 | -0.50662000 |
| C | -0.44154900 | -0.51694000 | -1.82007000 |
| C | 0.19457500  | 1.13207400  | -0.14009200 |
| C | 0.27462700  | 1.58745000  | 1.18260200  |
| C | 0.57055000  | 1.99106700  | -1.17494400 |
| C | 0.73502500  | 2.87333200  | 1.46600900  |
| H | -0.02229800 | 0.93337500  | 2.00107800  |
| C | 1.03216600  | 3.27952600  | -0.89509800 |
| H | 0.48959600  | 1.61516400  | -2.18990600 |
| C | 1.11624600  | 3.72475100  | 0.42518400  |
| H | 0.79887700  | 3.21110100  | 2.49777200  |
| H | 1.32715900  | 3.93695700  | -1.70973400 |
| H | 1.47617900  | 4.72692900  | 0.64444800  |
| H | -0.04304800 | -2.11158300 | -1.47271900 |
| C | 0.56927300  | -1.43373000 | 0.15266500  |
| H | 0.26088400  | -1.61983500 | 1.19221700  |
| O | 0.27927300  | -2.57803200 | -0.63397500 |
| C | 2.05741500  | -1.13902900 | 0.14227400  |
| C | 2.73964100  | -0.99712000 | -1.07498100 |
| C | 2.78187800  | -1.03899400 | 1.33360800  |
| C | 4.11127400  | -0.75342000 | -1.09248200 |
| H | 2.17691000  | -1.06768900 | -2.00022200 |
| C | 4.15792700  | -0.79805300 | 1.31956500  |
| H | 2.26685000  | -1.15912300 | 2.28521700  |
| C | 4.82703800  | -0.65454200 | 0.10451200  |
| H | 4.62638900  | -0.64206200 | -2.04368400 |
| H | 4.70516100  | -0.72921000 | 2.25673600  |
| H | 5.89844000  | -0.47051600 | 0.08809100  |

**Table S123. Cartesian coordinates of 1,2,3-triazole-5-ylidene 15, TS-4**

|   |             |             |             |
|---|-------------|-------------|-------------|
| C | 2.83260500  | 0.58227700  | 0.11744600  |
| C | 1.90570000  | -0.41554600 | -0.15262600 |
| N | 2.72621300  | -1.48281800 | -0.41602100 |
| H | 2.68161400  | 1.61265300  | 0.40124700  |
| N | 4.07642000  | 0.04602600  | -0.00327700 |
| C | 2.33095300  | -2.83138200 | -0.82913500 |
| H | 3.09604600  | -3.53091900 | -0.49026100 |
| H | 1.36197000  | -3.04710700 | -0.37075300 |
| C | 2.25626500  | -2.87094100 | -1.91995000 |
| H | 5.36994800  | 0.67580400  | 0.23844100  |
| H | 5.37346400  | 1.66843100  | -0.21616900 |
| H | 5.54836400  | 0.76174700  | 1.31364200  |
| H | 6.14064200  | 0.05420800  | -0.21657300 |
| N | 4.03635600  | -1.23162000 | -0.33362600 |
| C | 0.05330900  | -0.22443400 | 0.60347300  |
| O | 0.20285100  | -0.46989800 | 1.83694800  |
| C | -0.19299400 | 1.21543400  | 0.17545300  |
| C | -0.29058000 | 1.60882600  | -1.16593000 |
| C | -0.33894900 | 2.18148300  | 1.17599200  |
| C | -0.53603000 | 2.93992200  | -1.49894500 |
| H | -0.15913800 | 0.87297100  | -1.95513600 |
| C | -0.58067000 | 3.51675300  | 0.84531200  |
| H | -0.26412900 | 1.85683400  | 2.20886000  |
| C | -0.68165100 | 3.89986000  | -0.49273700 |
| H | -0.61282000 | 3.23060100  | -2.54385400 |
| H | -0.69605800 | 4.25676700  | 1.63369600  |
| H | -0.87367200 | 4.93779800  | -0.75285500 |
| H | -0.15092100 | -2.21061400 | 1.40143200  |
| C | -0.75603800 | -1.33722000 | -0.15267200 |
| H | -0.43147600 | -1.41904800 | -1.19543200 |
| O | -0.44254900 | -2.55220500 | 0.51685500  |

|   |             |             |             |
|---|-------------|-------------|-------------|
| C | -2.25410900 | -1.06903600 | -0.12425900 |
| C | -2.93928800 | -0.96626600 | 1.09501700  |
| C | -2.97861700 | -0.94424800 | -1.31371900 |
| C | -4.31433400 | -0.74194300 | 1.11779700  |
| H | -2.38208100 | -1.05328800 | 2.02271100  |
| C | -4.35728100 | -0.72041900 | -1.29473200 |
| H | -2.46066200 | -1.03116200 | -2.26703600 |
| C | -5.02941500 | -0.61880800 | -0.07704500 |
| H | -4.83141400 | -0.66215800 | 2.07095600  |
| H | -4.90407600 | -0.63075000 | -2.23024600 |
| H | -6.10261000 | -0.44664600 | -0.05702600 |

**Table S124. Cartesien coordinates of pyridyl-4-ylidene 16**

|   |             |             |             |
|---|-------------|-------------|-------------|
| C | 0.13642800  | -1.17552000 | -0.01241400 |
| C | -1.24208600 | -1.17562700 | 0.00596300  |
| C | -2.05786000 | -0.00003000 | 0.01279100  |
| C | -1.24211700 | 1.17560300  | 0.00597300  |
| C | 0.13639000  | 1.17555000  | -0.01242000 |
| H | 0.75160000  | -2.07281900 | -0.02194600 |
| H | -1.71111100 | -2.16241500 | 0.00796500  |
| N | 0.82737200  | 0.00001500  | -0.02508400 |
| C | 2.29205000  | 0.00000100  | 0.02069300  |
| H | 2.67169500  | -0.88796800 | -0.48887600 |
| H | 2.67162600  | 0.88869400  | -0.48764200 |
| H | 2.64741300  | -0.00070500 | 1.05656000  |
| H | 0.75153600  | 2.07287200  | -0.02198100 |
| H | -1.71119300 | 2.16237200  | 0.00799300  |

**Table S125. Cartesien coordinates of pyridyl-4-ylidene 16, IM-1**

|   |             |             |             |
|---|-------------|-------------|-------------|
| C | 2.87078400  | 0.79630900  | 0.59650400  |
| C | 1.64393600  | 1.26676700  | 0.20143500  |
| C | 0.74746900  | 0.43033900  | -0.48921500 |
| C | 1.16292700  | -0.88364800 | -0.76283400 |
| C | 2.40977000  | -1.31380700 | -0.36510600 |
| H | 3.59502900  | 1.39038700  | 1.14423700  |
| H | 1.28204700  | 2.28243100  | 0.36357200  |
| N | 3.25644100  | -0.48088400 | 0.30915900  |
| C | 4.60526600  | -0.94564000 | 0.66119900  |
| H | 4.98081200  | -0.35538400 | 1.49825900  |
| H | 4.56266600  | -1.99521100 | 0.95874300  |
| H | 5.28233400  | -0.83622600 | -0.19166500 |
| H | 2.78291800  | -2.31515000 | -0.54932400 |
| H | 0.50785600  | -1.57989100 | -1.27719500 |
| C | -0.56562100 | 1.14278000  | -0.95388600 |
| H | -0.55360600 | 0.87838200  | -2.05967900 |
| O | -0.55774000 | 2.41988800  | -0.66986100 |
| C | -1.75069600 | 0.31681900  | -0.36323800 |
| C | -2.25638300 | -0.84607100 | -0.95392700 |
| C | -2.34908000 | 0.79503100  | 0.80653100  |
| C | -3.32195000 | -1.53810300 | -0.37095900 |
| H | -1.83831300 | -1.19972000 | -1.89645400 |
| C | -3.40870600 | 0.10574800  | 1.39474500  |
| H | -1.97472900 | 1.73233200  | 1.20793300  |
| C | -3.89632100 | -1.06791500 | 0.81138500  |
| H | -3.71278000 | -2.43449900 | -0.84799200 |
| H | -3.86623300 | 0.48841000  | 2.30477500  |
| H | -4.72954000 | -1.60043000 | 1.26375600  |

**Table S126. Cartesien coordinates of pyridyl-4-ylidene 16, TS-2**

|   |             |             |             |
|---|-------------|-------------|-------------|
| C | 3.15840700  | 1.65257600  | 0.65442500  |
| C | 1.87240500  | 1.24865200  | 0.88610500  |
| C | 1.35191300  | 0.08269700  | 0.26712600  |
| C | 2.23802900  | -0.62766700 | -0.57857300 |
| C | 3.52364300  | -0.18988100 | -0.77377600 |
| H | 3.58721700  | 2.54105300  | 1.10362200  |
| H | 1.22519400  | 1.81152800  | 1.54667900  |
| N | 3.99137200  | 0.94063900  | -0.16812400 |
| C | 5.34357000  | 1.43400000  | -0.44987200 |
| H | 5.75583500  | 1.89708000  | 0.44891500  |
| H | 5.98155600  | 0.59701200  | -0.73863900 |
| H | 5.32424600  | 2.17046000  | -1.26004500 |
| H | 4.23205300  | -0.71642600 | -1.40299700 |
| H | 1.91580600  | -1.53923800 | -1.06861700 |
| C | -0.08055000 | -0.23931900 | 0.47548900  |
| H | -0.63405500 | 0.47832300  | -0.24994500 |
| O | -0.53140300 | 0.23717400  | 1.72124400  |
| C | -0.48049200 | -1.67647100 | 0.19670100  |
| C | -0.66328800 | -2.13914100 | -1.11338700 |
| C | -0.68890900 | -2.56313300 | 1.26071300  |
| C | -1.01725800 | -3.46860000 | -1.35837600 |
| H | -0.55059000 | -1.44853700 | -1.94701900 |
| C | -1.04468200 | -3.88928200 | 1.01779600  |
| H | -0.58881900 | -2.18741700 | 2.27375100  |
| C | -1.20423300 | -4.34910500 | -0.29235900 |
| H | -1.16318700 | -3.80928400 | -2.38049500 |
| H | -1.20470100 | -4.56608500 | 1.85365100  |
| H | -1.48682400 | -5.38188800 | -0.47950000 |
| H | -1.13887600 | 0.99623500  | 1.39260800  |
| O | -1.50429700 | 1.91634800  | 0.14687800  |
| C | -2.80603800 | 2.14164900  | -0.28464200 |
| C | -3.71535200 | 0.92034900  | -0.01221500 |
| H | -3.71415100 | 0.68169600  | 1.05830300  |
| H | -4.75471100 | 1.09279000  | -0.32344100 |
| H | -3.34113600 | 0.04071000  | -0.55067500 |
| C | -2.80133000 | 2.45068800  | -1.79990900 |
| H | -3.80153700 | 2.68413600  | -2.18984900 |

|   |             |            |             |
|---|-------------|------------|-------------|
| H | -2.14207200 | 3.30358100 | -2.00020100 |
| H | -2.41170100 | 1.58831500 | -2.35601300 |
| C | -3.36407900 | 3.36722200 | 0.48164500  |
| H | -4.38438500 | 3.62874800 | 0.16893300  |
| H | -3.37524300 | 3.15927400 | 1.55818500  |
| H | -2.71445100 | 4.23387800 | 0.31333300  |

**Table S127. Cartesian coordinates of pyridyl-4-ylidene 16, IM-2**

|   |             |             |             |
|---|-------------|-------------|-------------|
| C | 3.21035200  | 0.88047200  | -0.13697900 |
| C | 1.94681700  | 1.35350800  | -0.21881700 |
| C | 0.78606500  | 0.48684400  | -0.04017100 |
| C | 1.13628200  | -0.88348100 | 0.31302200  |
| C | 2.42320600  | -1.29248200 | 0.39344100  |
| H | 4.07698900  | 1.51491800  | -0.29155900 |
| H | 1.78950300  | 2.40386000  | -0.42725100 |
| N | 3.49593300  | -0.44248700 | 0.17009800  |
| C | 4.84261500  | -0.96578200 | 0.02905600  |
| H | 5.56738400  | -0.19469500 | 0.30661200  |
| H | 4.97790700  | -1.81803500 | 0.70186700  |
| H | 5.06017900  | -1.29496400 | -0.99787800 |
| H | 2.68872400  | -2.30744900 | 0.67047900  |
| H | 0.36088300  | -1.59539200 | 0.56739100  |
| O | -0.49042000 | 0.97917600  | -0.13046900 |
| C | -0.61088400 | 2.36898400  | -0.22090700 |
| C | -1.75426300 | 0.24120900  | -0.05527300 |
| C | -1.92124900 | -1.05079500 | -0.60055300 |
| C | -2.88992600 | 0.85828400  | 0.51603000  |
| C | -3.14970700 | -1.70335000 | -0.54042700 |
| H | -1.08836600 | -1.52674300 | -1.10807300 |
| C | -4.11833000 | 0.20404000  | 0.56733200  |
| H | -2.78685800 | 1.84959800  | 0.94790900  |
| C | -4.25721100 | -1.08383800 | 0.04541600  |
| H | -3.24883900 | -2.69577700 | -0.97371500 |
| H | -4.97055700 | 0.70052000  | 1.02524800  |
| H | -5.21564300 | -1.59416400 | 0.08553400  |
| H | -1.38115100 | 2.56102700  | -0.77963600 |

**Table S128. Cartesian coordinates of pyridyl-4-ylidene 16, TS-3**

|   |             |             |             |
|---|-------------|-------------|-------------|
| C | -3.97955400 | -0.61570200 | 0.69688300  |
| C | -2.69470600 | -0.46721200 | 1.14404800  |
| C | -1.70215300 | 0.14109300  | 0.33209800  |
| C | -2.13687500 | 0.61548500  | -0.92902200 |
| C | -3.43925000 | 0.45440200  | -1.33135000 |
| H | -4.76129500 | -1.07840700 | 1.28916800  |
| H | -2.39815700 | -0.78365900 | 2.13595500  |
| N | -4.35890400 | -0.16592500 | -0.53591000 |
| C | -5.72271600 | -0.39963500 | -1.02427000 |
| H | -6.41178100 | -0.41564100 | -0.17800200 |
| H | -6.01045200 | 0.40930400  | -1.69846600 |
| H | -5.78210800 | -1.35411200 | -1.55716600 |
| H | -3.80853500 | 0.81937300  | -2.28310700 |
| H | -1.45676000 | 1.14149400  | -1.58709200 |
| C | -0.30386200 | 0.13405800  | 0.87819300  |
| O | -0.24480400 | -0.11508000 | 2.17499900  |
| C | 0.58117000  | 1.27502600  | 0.38247700  |
| C | 0.94232800  | 1.49938300  | -0.95485200 |
| C | 1.04543000  | 2.17558900  | 1.35130300  |
| C | 1.71909100  | 2.60288100  | -1.31483200 |
| H | 0.66190800  | 0.78740200  | -1.72521000 |
| C | 1.82231100  | 3.27735800  | 0.99504400  |
| H | 0.78477200  | 1.97592700  | 2.38482600  |
| C | 2.15764400  | 3.50128600  | -0.34190100 |
| H | 1.99579500  | 2.74790500  | -2.35648600 |
| H | 2.16929300  | 3.96297500  | 1.76475700  |
| H | 2.76556400  | 4.35818300  | -0.62141600 |
| H | -0.19433800 | -1.63979300 | 1.95247400  |
| C | 0.17490100  | -1.52890700 | 0.13178900  |
| O | -0.19759600 | -2.32858800 | 1.18046000  |
| H | -0.42607300 | -1.72333700 | -0.76526400 |
| C | 1.63770800  | -1.53801400 | -0.18259500 |
| C | 2.08869000  | -1.65763800 | -1.50400800 |
| C | 2.58783900  | -1.45451300 | 0.84840000  |
| C | 3.45298600  | -1.69178700 | -1.79636300 |
| H | 1.36133900  | -1.74444000 | -2.30989500 |
| C | 3.94893600  | -1.48174200 | 0.55737400  |
| H | 2.24174000  | -1.35299800 | 1.87170500  |
| C | 4.38853400  | -1.60184300 | -0.76500900 |
| H | 3.78402500  | -1.79661600 | -2.82692600 |
| H | 4.67361100  | -1.41064900 | 1.36489100  |
| H | 5.45226500  | -1.62950000 | -0.98748900 |

**Table S129. Cartesian coordinates of pyridyl-4-ylidene 16, IM-3**

|   |            |             |             |
|---|------------|-------------|-------------|
| C | 3.94138400 | -0.62297900 | -0.89196800 |
| C | 2.60514100 | -0.51351700 | -1.18975700 |
| C | 1.66830200 | -0.20895800 | -0.18749600 |
| C | 2.16421900 | -0.01096200 | 1.11404200  |
| C | 3.51047700 | -0.14101300 | 1.37438600  |
| H | 4.70141800 | -0.85522400 | -1.63004000 |
| H | 2.19073900 | -0.65138000 | -2.18628800 |
| N | 4.39030400 | -0.44626500 | 0.38241500  |
| C | 5.81313900 | -0.64507900 | 0.70046900  |
| H | 6.41214000 | -0.43177100 | -0.18583200 |
| H | 6.10536100 | 0.03821500  | 1.49951400  |
| H | 5.98809700 | -1.67698600 | 1.01872100  |
| H | 3.93852200 | -0.00727900 | 2.36153000  |
| H | 1.50360100 | 0.25775300  | 1.93029900  |

|   |             |             |             |
|---|-------------|-------------|-------------|
| C | 0.17493600  | -0.17510900 | -0.64624600 |
| O | 0.10288600  | -0.45598100 | -1.95407900 |
| C | -0.35607600 | 1.22787300  | -0.26005400 |
| C | -0.72955200 | 1.60556800  | 1.03738000  |
| C | -0.43516700 | 2.18043100  | -1.28251800 |
| C | -1.16055200 | 2.90650300  | 1.30680500  |
| H | -0.72825500 | 0.87600800  | 1.84346600  |
| C | -0.86250300 | 3.48108200  | -1.01626500 |
| H | -0.17297300 | 1.85477800  | -2.28386300 |
| C | -1.22251600 | 3.85170300  | 0.28153300  |
| H | -1.46199700 | 3.17642000  | 2.31635200  |
| H | -0.92200000 | 4.20667900  | -1.82451000 |
| H | -1.56178100 | 4.86338800  | 0.49021600  |
| H | -0.00342200 | -2.14465100 | -1.44956100 |
| O | -0.52973500 | -1.38917200 | 0.16485100  |
| C | -0.10697100 | -2.53940800 | -0.53635600 |
| H | -0.15311200 | -1.46223700 | 1.19544000  |
| C | -2.04374300 | -1.27894900 | 0.21718100  |
| C | -2.72197100 | -1.42773300 | 1.43184400  |
| C | -2.79410800 | -1.07891900 | -0.95246000 |
| C | -4.11694800 | -1.37838200 | 1.48936000  |
| H | -2.15223600 | -1.59637200 | 2.34469700  |
| C | -4.18520900 | -1.02495800 | -0.89666300 |
| H | -2.26215500 | -0.94350400 | -1.88895800 |
| C | -4.85332100 | -1.17651400 | 0.32247700  |
| H | -4.62534800 | -1.50179600 | 2.44290900  |
| H | -4.75387400 | -0.86274300 | -1.80945200 |
| H | -5.93936000 | -1.13782800 | 0.36053200  |

**Table S130. Cartesien coordinates of pyridyl-4-ylidene 16, TS-4**

|   |             |             |             |
|---|-------------|-------------|-------------|
| C | 4.28916800  | -0.26650200 | -0.92287300 |
| C | 2.94648300  | -0.02745000 | -0.72259100 |
| C | 2.32385100  | 0.02077700  | 0.56140300  |
| C | 3.26780600  | -0.21297200 | 1.60474800  |
| C | 4.61076900  | -0.45184400 | 1.39799700  |
| H | 4.76385800  | -0.30366100 | -1.90022200 |
| H | 2.34947400  | 0.13064500  | -1.62150600 |
| N | 5.12137400  | -0.47612900 | 0.13605600  |
| C | 6.53502700  | -0.79664200 | -0.08782300 |
| C | 6.89245500  | -0.26549100 | -0.97219000 |
| H | 7.12022500  | -0.47839900 | 0.77692400  |
| H | 6.66667700  | -1.87333100 | -0.23589100 |
| H | 5.32983900  | -0.62992300 | 2.19379300  |
| H | 2.94649400  | -0.20741800 | 2.64797500  |
| C | -0.57575600 | 0.06425400  | -0.96178200 |
| O | -0.21886900 | -0.11751900 | -2.12273400 |
| C | -0.95554400 | 1.42034600  | -0.47723200 |
| C | -0.66659500 | 1.85468900  | 0.82458900  |
| C | -1.60211000 | 2.28783900  | -1.36980500 |
| C | -1.03910800 | 3.13602500  | 1.22806300  |
| H | -0.08218000 | 1.21383600  | 1.47590200  |
| C | -1.98756000 | 3.56132400  | -0.95693200 |
| H | -1.80378700 | 1.94554500  | -2.38014400 |
| C | -1.70865600 | 3.98610800  | 0.34440100  |
| H | -0.79812400 | 3.47638900  | 2.23175500  |
| H | -2.50139700 | 4.22326600  | -1.64894300 |
| H | -2.00356700 | 4.98177600  | 0.66608600  |
| H | 0.08541300  | -1.93646600 | -1.59973200 |
| C | -0.73939000 | -1.17970700 | -0.05838700 |
| O | -0.15128000 | -2.28020700 | -0.71379500 |
| H | -0.20708100 | -0.98466000 | 0.87829900  |
| C | -2.22420200 | -1.41595000 | 0.21606300  |
| C | -2.82138100 | -0.97407900 | 1.40122800  |
| C | -3.01227000 | -2.07708400 | -0.73362800 |
| C | -4.18252300 | -1.18072100 | 1.63214500  |
| H | -2.21797200 | -0.46802700 | 2.15090500  |
| C | -4.37203000 | -2.28455300 | -0.50563800 |
| H | -2.54316100 | -2.44575800 | -1.64059300 |
| C | -4.96284800 | -1.83484300 | 0.67774200  |
| H | -4.63073500 | -0.83645300 | 2.56085800  |
| H | -4.97140500 | -2.80188700 | -1.25080000 |
| H | -6.02224700 | -1.99937700 | 0.85722600  |

**Table S131. Cartesien coordinates of pyridyl-3-ylidene 17**

|   |             |             |             |
|---|-------------|-------------|-------------|
| C | -0.12611200 | 1.16292400  | -0.05217000 |
| C | 1.25464800  | 1.11962400  | -0.04953400 |
| C | 1.89002300  | -0.12747800 | 0.08934100  |
| C | 1.20929200  | -1.36282500 | 0.01889500  |
| C | -0.16634300 | -1.20346600 | -0.09443100 |
| H | 2.96757700  | -0.11261000 | 0.27584800  |
| H | -0.69996700 | 2.08269700  | -0.03951900 |
| H | 1.80510000  | 2.05745400  | -0.08706400 |
| N | -0.83207800 | 0.00456900  | -0.03588300 |
| C | -2.29512900 | 0.04764300  | 0.08788000  |
| H | -2.68408600 | 0.93539900  | -0.41542700 |
| H | -2.71576900 | -0.84402400 | -0.38189900 |
| H | -2.59159500 | 0.06919600  | 1.14145300  |
| H | -0.85498400 | -2.03862100 | -0.24209800 |

**Table S132. Cartesien coordinates of pyridyl-3-ylidene 17, IM-1**

|   |            |             |             |
|---|------------|-------------|-------------|
| C | 3.45613000 | 0.21034600  | -0.54932100 |
| C | 3.21345000 | -1.13720300 | -0.68857700 |
| C | 1.94483700 | -1.66267400 | -0.40054700 |
| C | 0.93794900 | -0.82193200 | 0.08969100  |
| C | 1.24114900 | 0.53632100  | 0.22524800  |
| H | 1.74600100 | -2.72141900 | -0.53549800 |

|   |             |             |             |
|---|-------------|-------------|-------------|
| H | 4.40255600  | 0.68816300  | -0.76578200 |
| H | 4.01715200  | -1.77733300 | -1.03904700 |
| N | 2.44365800  | 1.03346500  | -0.10809000 |
| C | 2.71037000  | 2.47571000  | -0.00314900 |
| H | 2.93101900  | 2.88552900  | -0.99280500 |
| H | 1.83269300  | 2.97374400  | 0.40793600  |
| H | 3.56354500  | 2.64206000  | 0.65952500  |
| H | 0.50694300  | 1.22794700  | 0.61862500  |
| C | -0.35456100 | -1.25287700 | 0.78260900  |
| H | -0.49561800 | -2.34349000 | 0.57251400  |
| O | -0.01588700 | -0.93456600 | 2.04452800  |
| C | -1.59679600 | -0.53613400 | 0.21605500  |
| C | -2.04619700 | -0.73052200 | -1.09641400 |
| C | -2.30387900 | 0.32845700  | 1.05382800  |
| C | -3.17759500 | -0.06353700 | -1.56615600 |
| H | -1.50785600 | -1.41195500 | -1.75493400 |
| C | -3.44067400 | 0.99584300  | 0.58910800  |
| H | -1.93733200 | 0.44024100  | 2.07059100  |
| C | -3.87887600 | 0.80431000  | -0.72226500 |
| C | -3.51745800 | -0.22170300 | -2.58738900 |
| H | -3.98834900 | 1.66247700  | 1.25200300  |
| H | -4.76365500 | 1.32137100  | -1.08598800 |

**Table S133. Cartesian coordinates of pyridyl-3-ylidene 17, TS-2**

|   |             |             |             |
|---|-------------|-------------|-------------|
| C | -3.63788800 | -2.07494800 | -0.02839800 |
| C | -2.66484800 | -2.60016400 | -0.87178200 |
| C | -1.49956500 | -1.89324700 | -1.11785100 |
| C | -1.26862700 | -0.63216900 | -0.50362000 |
| C | -2.29348100 | -0.15647600 | 0.32385900  |
| H | -0.73533800 | -2.27225600 | -1.78508100 |
| H | -4.57027300 | -2.56992400 | 0.20910900  |
| H | -2.84084700 | -3.56543900 | -1.33477600 |
| N | -3.42711000 | -0.86034900 | 0.54207700  |
| C | -4.45042100 | -0.31609800 | 1.45342400  |
| H | -4.34571700 | -0.77174000 | 2.44188500  |
| H | -4.32232000 | 0.76331500  | 1.53284600  |
| H | -5.44234400 | -0.53192300 | 1.05246700  |
| H | -2.22856900 | 0.80544500  | 0.81642700  |
| C | 0.02241000  | 0.04875700  | -0.69976700 |
| H | 0.83260200  | -0.60475100 | -0.03165300 |
| O | 0.56054300  | -0.26295200 | -1.97666900 |
| C | 0.08274100  | 1.51699900  | -0.36357200 |
| C | 0.04482400  | 1.95952100  | 0.96961300  |
| C | 0.21200500  | 2.47672200  | -1.37861800 |
| C | 0.09442300  | 3.32129100  | 1.27757100  |
| H | 0.00957100  | 1.22824300  | 1.77542800  |
| C | 0.26775300  | 3.83571400  | -1.07166300 |
| H | 0.28369500  | 2.13288800  | -2.40505200 |
| C | 0.20087200  | 4.26622600  | 0.25629100  |
| H | 0.07229100  | 3.64061800  | 2.31688700  |
| H | 0.36726200  | 4.56406900  | -1.87307000 |
| H | 0.24873700  | 5.32598500  | 0.49298100  |
| H | 1.35882900  | -0.79928900 | -1.70459300 |
| O | 1.88501300  | -1.59923000 | -0.21386200 |
| C | 3.08816100  | -1.40570600 | 0.46808800  |
| C | 3.75090100  | -0.06423700 | 0.08048800  |
| H | 3.09428700  | 0.77603800  | 0.33675700  |
| H | 4.71288300  | 0.09009200  | 0.58821300  |
| H | 3.92815100  | -0.03311700 | -1.00150900 |
| C | 2.84135400  | -1.43573400 | 1.99425100  |
| H | 2.33559300  | -2.36927600 | 2.26763800  |
| H | 3.77140300  | -1.36090600 | 2.57381300  |
| H | 2.19246900  | -0.60042000 | 2.28927000  |
| C | 4.03121200  | -2.56886400 | 0.08401400  |
| H | 5.00499800  | -2.50124100 | 0.58798900  |
| H | 3.56657600  | -3.52562400 | 0.34883700  |
| H | 4.20041400  | -2.56640200 | -0.99906500 |

**Table S134. Cartesian coordinates of pyridyl-3-ylidene 17, IM-2**

|   |             |             |             |
|---|-------------|-------------|-------------|
| C | 3.68185400  | -0.15863300 | 0.03624300  |
| C | 3.36211300  | 1.20208000  | 0.19902500  |
| C | 2.06420200  | 1.63848200  | 0.19368700  |
| C | 0.95061500  | 0.70421300  | 0.06737300  |
| C | 1.36138000  | -0.64837700 | -0.17912400 |
| H | 1.83284100  | 2.69190900  | 0.28551100  |
| H | 4.67973300  | -0.57195000 | 0.03918900  |
| H | 4.17682500  | 1.91010000  | 0.31959700  |
| N | 2.64807100  | -1.02333800 | -0.17507600 |
| C | 2.97791700  | -2.44028600 | -0.39249300 |
| C | 3.32936500  | -2.88399600 | 0.54324600  |
| H | 2.09315400  | -2.97315300 | -0.74014600 |
| H | 3.76540900  | -2.51356000 | -1.14613800 |
| H | 0.64864800  | -1.42347000 | -0.42261000 |
| O | -0.37071100 | 1.11933400  | 0.08044000  |
| C | -0.54898100 | 2.51099500  | 0.01986800  |
| C | -1.58098900 | 0.31601300  | 0.04528100  |
| C | -1.68066400 | -0.97830500 | 0.61579700  |
| C | -2.76644300 | 0.85834200  | -0.51298400 |
| C | -2.87356000 | -1.69391200 | 0.58808300  |
| H | -0.82699400 | -1.40188400 | 1.13636900  |
| C | -3.95731100 | 0.13898200  | -0.53028000 |
| C | -2.72539000 | 1.84510700  | -0.96414100 |
| C | -4.02406400 | -1.14759500 | 0.01120200  |
| H | -2.91205300 | -2.68071600 | 1.04453400  |
| H | -4.84163300 | 0.58483300  | -0.98034900 |
| H | -4.95462800 | -1.70802600 | -0.00458100 |
| H | -1.27597200 | 2.73818200  | 0.62259900  |



**Table S135. Cartesien coordinates of pyridyl-3-ylidene 17, TS-3**

|   |             |             |             |
|---|-------------|-------------|-------------|
| C | 4.10439200  | -0.29561300 | -0.35731100 |
| C | 3.91254800  | 0.15566500  | 0.94262600  |
| C | 2.68280800  | 0.66379600  | 1.32932700  |
| C | 1.58512100  | 0.68937900  | 0.42281400  |
| C | 1.85556600  | 0.25253200  | -0.87791600 |
| H | 2.50652100  | 1.07776500  | 2.31574600  |
| H | 5.03693700  | -0.69462400 | -0.73415700 |
| H | 4.74783000  | 0.12314500  | 1.63478000  |
| N | 3.07038500  | -0.21951900 | -1.23971200 |
| C | 3.28265000  | -0.69481500 | -2.61840200 |
| H | 3.27049900  | -1.78799500 | -2.63892600 |
| H | 2.48801100  | -0.31024100 | -3.25726200 |
| H | 4.24563500  | -0.33126700 | -2.98272300 |
| H | 1.11625300  | 0.29546300  | -1.66514300 |
| C | 0.28198100  | 1.17310800  | 0.92221700  |
| O | 0.33243400  | 1.86935300  | 2.02586700  |
| C | -0.77918600 | 1.58042400  | -0.08077400 |
| C | -1.23515400 | 0.80375800  | -1.16130400 |
| C | -1.36016200 | 2.84649000  | 0.10719000  |
| C | -2.20522500 | 1.29342500  | -2.03992900 |
| H | -0.87933300 | -0.21195500 | -1.29784400 |
| C | -2.32707500 | 3.33451500  | -0.76832800 |
| H | -1.02650400 | 3.42718600  | 0.95998200  |
| C | -2.75116600 | 2.56289000  | -1.85348400 |
| H | -2.54778300 | 0.66692300  | -2.86021500 |
| H | -2.75358000 | 4.32126300  | -0.60305100 |
| H | -3.50806900 | 2.94086300  | -2.53622700 |
| H | -0.58460000 | 0.91058600  | 2.83283100  |
| C | -0.30178200 | -0.62473500 | 1.81928100  |
| H | 0.71550700  | -0.93149300 | 2.10904800  |
| O | -1.01729500 | -0.02709300 | 2.79248900  |
| C | -1.00050200 | -1.59721700 | 0.97826200  |
| C | -0.27782200 | -2.57986100 | 0.27166300  |
| C | -2.40094500 | -1.56548700 | 0.83221400  |
| C | -0.92806800 | -3.48582000 | -0.56318900 |
| H | 0.80173300  | -2.63840500 | 0.40018200  |
| C | -3.04794900 | -2.47625600 | 0.00133900  |
| H | -2.95972800 | -0.82044300 | 1.38793300  |
| C | -2.31858800 | -3.43751300 | -0.70545700 |
| H | -0.35345500 | -4.24288800 | -1.09246100 |
| H | -4.13026000 | -2.43849900 | -0.09611900 |
| H | -2.82807600 | -4.14883100 | -1.35026300 |

**Table S136. Cartesien coordinates of pyridyl-3-ylidene 17, IM-3**

|   |             |             |             |
|---|-------------|-------------|-------------|
| C | 4.04458700  | 0.68636600  | 0.29260700  |
| C | 3.92374100  | 0.09097600  | -0.94901300 |
| C | 2.68432200  | -0.40308900 | -1.35718700 |
| C | 1.55451800  | -0.27122600 | -0.53238800 |
| C | 1.73784800  | 0.33977400  | 0.69886800  |
| H | 2.50787400  | -0.92520000 | -2.29440900 |
| H | 4.97605000  | 1.07449000  | 0.68608100  |
| H | 4.80328100  | 0.00890700  | -1.57930800 |
| N | 2.95591900  | 0.79734400  | 1.09621800  |
| C | 3.09885100  | 1.36868400  | 2.44847200  |
| C | 2.18693900  | 1.90895900  | 2.70582000  |
| H | 3.26804500  | 0.56865000  | 3.17449200  |
| H | 3.94182000  | 2.06068000  | 2.46117700  |
| H | 0.93849100  | 0.46439100  | 1.41611800  |
| C | 0.23407000  | -0.85095200 | -1.09251300 |
| O | 0.51156400  | -1.64589100 | -2.13322200 |
| C | -0.53092300 | -1.59911800 | 0.04177600  |
| C | -1.10790800 | -1.01505200 | 1.18159400  |
| C | -0.61841000 | -2.99129200 | -0.09527000 |
| C | -1.73869200 | -1.79960600 | 2.15248600  |
| H | -1.11501400 | 0.06200200  | 1.31098900  |
| C | -1.24413100 | -3.77644000 | 0.87192800  |
| H | -0.18325000 | -3.42065600 | -0.99112300 |
| C | -1.80657200 | -3.18443900 | 2.00510200  |
| H | -2.18889700 | -1.31956100 | 3.01865900  |
| H | -1.29724800 | -4.85486300 | 0.73910300  |
| H | -2.30019900 | -3.79335600 | 2.75875000  |
| H | -0.92765100 | -1.03015900 | -2.87802300 |
| C | -0.61035500 | 0.41057800  | -1.76278800 |
| H | 0.18258500  | 0.96808600  | -2.29714400 |
| O | -1.47252700 | -0.21685800 | -2.66425600 |
| C | -1.35897000 | 1.38013300  | -0.88761300 |
| C | -0.71416700 | 2.50232500  | -0.34451900 |
| C | -2.72062300 | 1.19489000  | -0.60496600 |
| C | -1.39373900 | 3.39114800  | 0.49082600  |
| H | 0.32649500  | 2.69469100  | -0.60134800 |
| C | -3.40362900 | 2.08518300  | 0.22284700  |
| H | -3.22676700 | 0.34721200  | -1.05296900 |
| C | -2.74331500 | 3.18198100  | 0.78330400  |
| H | -0.87669700 | 4.25922700  | 0.89436900  |
| H | -4.45927300 | 1.92517200  | 0.42900100  |
| H | -3.27932300 | 3.87698500  | 1.42474300  |

**Table S137. Cartesien coordinates of pyridyl-3-ylidene 17, TS-4**

|   |            |             |             |
|---|------------|-------------|-------------|
| C | 5.00446500 | -1.40916500 | -0.10878600 |
| C | 3.99146000 | -2.34424400 | -0.01198900 |
| C | 2.65876500 | -1.92446900 | -0.14203400 |
| C | 2.27989300 | -0.58941900 | -0.43194600 |
| C | 3.37942000 | 0.25959400  | -0.52917800 |
| H | 1.87726800 | -2.67259100 | 0.00097400  |
| H | 6.05659600 | -1.64239400 | 0.01053600  |
| H | 4.25667200 | -3.38101600 | 0.18180600  |

|   |             |             |             |
|---|-------------|-------------|-------------|
| N | 4.69269000  | -0.11371700 | -0.35405800 |
| C | 5.76744800  | 0.89031300  | -0.37906900 |
| H | 5.42185300  | 1.76488100  | -0.93217500 |
| H | 6.03024200  | 1.19031900  | 0.63989400  |
| H | 6.64881100  | 0.47778400  | -0.87509800 |
| H | 3.28453500  | 1.32354100  | -0.75357200 |
| C | -0.57392900 | -0.06587400 | 1.01257300  |
| O | -0.35755000 | -0.35111200 | 2.18553200  |
| C | -0.63609200 | 1.35350700  | 0.56190400  |
| C | -0.27539200 | 1.74673700  | -0.73526700 |
| C | -1.06233800 | 2.32121200  | 1.48309000  |
| C | -0.35876600 | 3.08827000  | -1.10527900 |
| H | 0.13446900  | 1.00906800  | -1.41639200 |
| C | -1.15643900 | 3.65924300  | 1.10619400  |
| H | -1.32366900 | 2.00524600  | 2.48815600  |
| C | -0.80750300 | 4.04453100  | -0.19037500 |
| H | -0.06813800 | 3.39010400  | -2.10829900 |
| H | -1.50048800 | 4.40117200  | 1.82196900  |
| H | -0.87785000 | 5.08859000  | -0.48512400 |
| H | -0.35841200 | -2.17398600 | 1.60045200  |
| C | -0.93167100 | -1.22301200 | 0.05083000  |
| H | -0.33894400 | -1.10733700 | -0.86037300 |
| O | -0.58086200 | -2.43837900 | 0.68277500  |
| C | -2.42347100 | -1.16832700 | -0.27429100 |
| C | -2.88035300 | -0.62926800 | -1.48114700 |
| C | -3.35858600 | -1.65114100 | 0.64922500  |
| C | -4.24663800 | -0.56768200 | -1.76108000 |
| H | -2.16272000 | -0.25883400 | -2.20917100 |
| C | -4.72356800 | -1.59121200 | 0.37229600  |
| H | -3.00458500 | -2.09086600 | 1.57668900  |
| C | -5.17265100 | -1.04712000 | -0.83371800 |
| H | -4.58601600 | -0.15132600 | -2.70624900 |
| H | -5.43867900 | -1.97224700 | 1.09719100  |
| H | -6.23679700 | -1.00301900 | -1.05099000 |

**Table S138. Cartesien coordinates of pyridyl-2-ylidene 18**

|   |             |             |             |
|---|-------------|-------------|-------------|
| C | 0.21775100  | 1.13825900  | 0.00017500  |
| C | -1.15200300 | 1.20599300  | 0.00016300  |
| C | -1.87169800 | -0.00524700 | -0.00003100 |
| C | -1.17822400 | -1.20169400 | -0.00020000 |
| C | 0.24717500  | -1.31573200 | -0.00019400 |
| H | -2.96026000 | 0.01676000  | -0.00004600 |
| H | 0.84832100  | 2.02286100  | 0.00032000  |
| H | -1.64791400 | 2.17078800  | 0.00030100  |
| H | -1.74444200 | -2.13195800 | -0.00034900 |
| N | 0.84905000  | -0.07646900 | 0.00000100  |
| C | 2.32319100  | -0.05135700 | 0.00003000  |
| H | 2.69706100  | 0.46229000  | 0.89236800  |
| H | 2.64964300  | -1.08936900 | -0.00013600 |
| H | 2.69709100  | 0.46258600  | -0.89212400 |

**Table S139. Cartesien coordinates of pyridyl-2-ylidene 18, TS-1**

|   |             |             |             |
|---|-------------|-------------|-------------|
| C | 3.18488200  | -0.58146600 | -0.88374800 |
| C | 3.90040800  | 0.56343500  | -0.62287800 |
| C | 3.27012300  | 1.59265400  | 0.09545000  |
| C | 1.96463000  | 1.41221100  | 0.52446300  |
| C | 1.22242200  | 0.24653900  | 0.24527600  |
| H | 3.80992600  | 2.51150400  | 0.31316700  |
| H | 3.60083800  | -1.42272100 | -1.42765200 |
| H | 4.92524100  | 0.64784100  | -0.96693700 |
| H | 1.47768800  | 2.19418000  | 1.10376700  |
| N | 1.89359000  | -0.70545300 | -0.46263900 |
| C | 1.15335800  | -1.94203200 | -0.79791000 |
| H | 1.85719400  | -2.71514600 | -1.11254700 |
| H | 0.59966600  | -2.25040000 | 0.09393700  |
| H | 0.45150800  | -1.72730500 | -1.60734500 |
| C | -0.44461700 | -0.35376300 | 1.48160800  |
| O | -0.15135800 | 0.48284900  | 2.15295000  |
| H | -0.23498200 | -1.53213700 | 1.82775000  |
| C | -1.60536700 | 0.00852300  | 0.58216600  |
| C | -1.93468900 | 1.34293600  | 0.31631500  |
| C | -2.41002900 | -1.00715800 | 0.05656800  |
| C | -3.03227600 | 1.65829100  | -0.48243500 |
| H | -1.32259400 | 2.13807200  | 0.73893900  |
| C | -3.50913400 | -0.69615800 | -0.74544800 |
| H | -2.16509800 | -2.03518500 | 0.30709200  |
| C | -3.82152200 | 0.63690900  | -1.02049500 |
| H | -3.27766500 | 2.69848100  | -0.68316200 |
| H | -4.12961400 | -1.49338200 | -1.14826400 |
| H | -4.68013200 | 0.88095700  | -1.64106300 |

**Table S140. Cartesien coordinates of pyridyl-2-ylidene 18, IM-1**

|   |             |             |             |
|---|-------------|-------------|-------------|
| C | -2.76956200 | 0.29807600  | -1.28007000 |
| C | -3.72846900 | -0.48529100 | -0.68376800 |
| C | -3.42020300 | -1.08593800 | 0.54993900  |
| C | -2.18256600 | -0.86098900 | 1.11819700  |
| C | -1.20489600 | -0.06678000 | 0.48608500  |
| H | -4.14718100 | -1.72230700 | 1.04661500  |
| H | -2.93568100 | 0.80282000  | -2.22446800 |
| H | -4.69047400 | -0.61738800 | -1.16473400 |
| H | -1.92238600 | -1.29483800 | 2.07788400  |
| N | -1.54342800 | 0.48356700  | -0.72554200 |
| C | -0.59126400 | 1.40116800  | -1.38560400 |
| H | -1.11918600 | 1.95306000  | -2.16422000 |
| H | -0.22220400 | 2.05232800  | -0.58190200 |
| H | 0.23431800  | 0.83162400  | -1.81491800 |

|   |             |             |             |
|---|-------------|-------------|-------------|
| C | 0.07422000  | 0.36775900  | 1.22892800  |
| H | 0.05436800  | -0.25961900 | 2.15965800  |
| O | -0.12033700 | 1.67502600  | 1.43836100  |
| C | 1.38314800  | -0.04161900 | 0.51414900  |
| C | 1.60712000  | -1.32826100 | 0.00942200  |
| C | 2.40507100  | 0.90637500  | 0.43363700  |
| C | 2.82903300  | -1.65713700 | -0.58110000 |
| H | 0.82258900  | -2.08174200 | 0.07766700  |
| C | 3.63195800  | 0.57937000  | -0.14700900 |
| H | 2.19989500  | 1.89441700  | 0.83680600  |
| C | 3.84651600  | -0.70217500 | -0.65997300 |
| H | 2.98953100  | -2.65780800 | -0.97615300 |
| H | 4.42268300  | 1.32444400  | -0.20105000 |
| H | 4.79977700  | -0.95751900 | -1.11627400 |

**Table S141. Cartesien coordinates of pyridyl-2-ylidene 18, TS-2**

|   |             |             |             |
|---|-------------|-------------|-------------|
| C | 3.25177800  | 2.05248300  | 0.41598500  |
| C | 3.38070600  | 2.40005000  | -0.90210200 |
| C | 2.52163100  | 1.79364000  | -1.84246700 |
| C | 1.55876600  | 0.91415200  | -1.40012200 |
| C | 1.41808100  | 0.58340800  | -0.03390000 |
| H | 2.59390700  | 2.04569400  | -2.89586600 |
| H | 3.88254200  | 2.46992500  | 1.19145200  |
| H | 4.12897500  | 3.12751900  | -1.19408600 |
| H | 0.83489600  | 0.48781400  | -2.08515700 |
| N | 2.32554300  | 1.13940800  | 0.83866900  |
| C | 2.36944500  | 0.72979200  | 2.25989500  |
| H | 3.34187200  | 1.02025100  | 2.66089500  |
| H | 1.55260500  | 1.19119100  | 2.81141100  |
| H | 2.24882800  | -0.35077900 | 2.32366200  |
| C | 0.24267300  | -0.20060600 | 0.41089900  |
| H | -0.67360100 | 0.39152800  | -0.15562100 |
| O | -0.16975200 | 0.09251500  | 1.73474300  |
| C | 0.23159300  | -1.67656700 | 0.09227600  |
| C | 1.11703700  | -2.29629800 | -0.80448400 |
| C | -0.74536700 | -2.47383900 | 0.71307200  |
| C | 1.01469700  | -3.65879200 | -1.08928400 |
| H | 1.90761000  | -1.72157400 | -1.27931800 |
| C | -0.84150200 | -3.83539600 | 0.43297000  |
| H | -1.41524600 | -2.00975200 | 1.42765000  |
| C | 0.03383600  | -4.43694200 | -0.47417700 |
| H | 1.71499500  | -4.11364600 | -1.78581300 |
| H | -1.60581800 | -4.42998400 | 0.92735400  |
| H | -0.04267600 | -5.49878200 | -0.69237500 |
| H | -0.91097600 | 0.74407100  | 1.52639800  |
| O | -1.62340500 | 1.47292600  | 0.14550000  |
| C | -2.97536200 | 1.41742500  | -0.20133300 |
| C | -3.11678800 | 1.47513900  | -1.73910800 |
| H | -4.16475300 | 1.49891900  | -2.06684000 |
| H | -2.61284600 | 2.37049600  | -2.12148100 |
| H | -2.63981400 | 0.59756000  | -2.19446900 |
| C | -3.67213400 | 2.64796100  | 0.42276500  |
| H | -4.74258000 | 2.68971000  | 0.18061400  |
| H | -3.56540500 | 2.62258800  | 1.51377000  |
| H | -3.19657400 | 3.56653100  | 0.06052800  |
| C | -3.64643600 | 0.13040800  | 0.32808200  |
| H | -4.71630100 | 0.08654000  | 0.08409600  |
| H | -3.16447800 | -0.75598900 | -0.10243000 |
| H | -3.54462700 | 0.07467900  | 1.41920800  |

**Table S142. Cartesien coordinates of pyridyl-2-ylidene 18, IM-2**

|   |             |             |             |
|---|-------------|-------------|-------------|
| C | 3.47972100  | 0.02408500  | -0.24667100 |
| C | 3.52662800  | -1.29227000 | -0.54350300 |
| C | 2.31456700  | -2.07383400 | -0.43490800 |
| C | 1.13443600  | -1.46633500 | -0.15907000 |
| C | 1.04827600  | -0.02533800 | -0.01042100 |
| H | 2.35132300  | -3.14703000 | -0.59721500 |
| H | 4.36362100  | 0.65660100  | -0.24558000 |
| H | 4.46124000  | -1.74833600 | -0.85035400 |
| H | 0.21590200  | -2.03892700 | -0.12927000 |
| N | 2.29983800  | 0.68258900  | 0.10143700  |
| C | 2.43357700  | 1.64630400  | 1.20851800  |
| H | 3.35982100  | 2.21320800  | 1.07155600  |
| H | 1.59176900  | 2.33887000  | 1.21527600  |
| C | 2.47751100  | 1.13272300  | 2.17852200  |
| C | -0.10215400 | 0.71675500  | -0.12777100 |
| O | -0.01059300 | 2.07968000  | -0.36510800 |
| C | -1.48553000 | 0.24107600  | -0.03323800 |
| C | -1.86786700 | -0.79559900 | 0.84050000  |
| C | -2.49035300 | 0.86326000  | -0.80097100 |
| C | -3.19095500 | -1.22715500 | 0.90399300  |
| H | -1.12638000 | -1.24209700 | 1.49605500  |
| C | -3.81276800 | 0.43479400  | -0.72799400 |
| H | -2.21660100 | 1.68334200  | -1.45598500 |
| C | -4.17132700 | -0.61833000 | 0.11754500  |
| H | -3.46043400 | -2.02848900 | 1.58743400  |
| H | -4.56880800 | 0.92510200  | -1.33624000 |
| H | -5.20436800 | -0.95073100 | 0.17332600  |
| H | 0.84377100  | 2.22572400  | -0.81277400 |

**Table S143. Cartesien coordinates of pyridyl-2-ylidene 18, TS-3**

|   |            |             |            |
|---|------------|-------------|------------|
| C | 4.29511100 | -0.38202300 | 0.19326200 |
| C | 4.27671500 | -0.52369000 | 1.55317100 |
| C | 3.05027300 | -0.32867900 | 2.22115100 |
| C | 1.91961700 | -0.06981100 | 1.48170900 |
| C | 1.93828200 | 0.04010200  | 0.06845100 |

|   |             |             |             |
|---|-------------|-------------|-------------|
| H | 2.99287700  | -0.40583900 | 3.30262300  |
| H | 5.20074300  | -0.48764000 | -0.39212400 |
| H | 5.18838700  | -0.77417100 | 2.08286500  |
| H | 0.95821500  | 0.02444700  | 1.96949400  |
| N | 3.17399000  | -0.06587100 | -0.52735500 |
| C | 3.40290400  | 0.28900100  | -1.95183800 |
| H | 4.19834300  | -0.34925800 | -2.34141100 |
| H | 2.45993400  | 0.14419700  | -2.48361800 |
| H | 3.71261600  | 1.33727100  | -1.99977800 |
| C | 0.65392200  | 0.10822200  | -0.72281600 |
| O | 0.71878000  | -0.15332300 | -2.01216700 |
| C | -0.28357400 | 1.25342300  | -0.35635200 |
| C | -0.08436500 | 2.18866500  | 0.67031300  |
| C | -1.40279300 | 1.42714200  | -1.18817300 |
| C | -0.99071400 | 3.23077600  | 0.88542700  |
| H | 0.79833100  | 2.14313300  | 1.30023000  |
| C | -2.30941000 | 2.46040600  | -0.97224000 |
| H | -1.53271800 | 0.74382100  | -2.01827400 |
| C | -2.11350600 | 3.36754200  | 0.07225200  |
| H | -0.80422600 | 3.94353700  | 1.68535700  |
| H | -3.17064900 | 2.56289500  | -1.62781200 |
| H | -2.81882300 | 4.17753600  | 0.23925100  |
| H | 0.49356900  | -1.62493400 | -1.87124700 |
| O | -0.07793400 | -1.64478200 | -0.09253200 |
| C | 0.26376900  | -2.37137700 | -1.18534700 |
| H | 0.49416800  | -1.91697600 | 0.80105100  |
| C | -1.53190900 | -1.51893500 | 0.19457400  |
| C | -2.47992000 | -1.77202900 | -0.80920300 |
| C | -1.99004600 | -1.15623500 | 1.47145000  |
| C | -3.84315000 | -1.65374100 | -0.54524700 |
| H | -2.12503400 | -2.08393700 | -1.78584800 |
| C | -3.35206300 | -1.03443600 | 1.73591400  |
| H | -1.27170800 | -0.97923700 | 2.27020300  |
| C | -4.28597600 | -1.27978200 | 0.72577400  |
| H | -4.56451500 | -1.85978600 | -1.33245400 |
| H | -3.68715600 | -0.75429300 | 2.73157300  |
| H | -5.34946200 | -1.18888600 | 0.93123400  |

**Table S144. Cartesian coordinates of pyridyl-2-ylidene 18, IM-3**

|   |             |             |             |
|---|-------------|-------------|-------------|
| C | 4.21883100  | 0.19771000  | -0.29646300 |
| C | 4.70573400  | -0.75881100 | 0.56148300  |
| C | 3.78319500  | -1.61583300 | 1.17571200  |
| C | 2.43223000  | -1.46125600 | 0.92165700  |
| C | 1.94491500  | -0.45208300 | 0.06640500  |
| H | 4.12294200  | -2.39788100 | 1.84853800  |
| H | 4.86664500  | 0.88323100  | -0.82879000 |
| H | 5.77340200  | -0.83936600 | 0.72916000  |
| H | 1.71977900  | -2.14873100 | 1.35206300  |
| N | 2.88866600  | 0.34601900  | -0.53464500 |
| C | 2.48804800  | 1.35388800  | -1.54635700 |
| H | 3.37220600  | 1.62934100  | -2.12225400 |
| H | 1.72763900  | 0.86653200  | -2.16492600 |
| H | 2.06913900  | 2.22977300  | -1.05039800 |
| C | 0.45145900  | -0.32737300 | -0.37212900 |
| O | 0.48095800  | -0.66980900 | -1.68381900 |
| C | -0.09691100 | 1.07143800  | -0.03609400 |
| C | 0.12727400  | 1.68737800  | 1.20181000  |
| C | -0.87961400 | 1.73189500  | -0.98790800 |
| C | -0.41750400 | 2.94287000  | 1.48218000  |
| H | 0.73294500  | 1.18718700  | 1.95620900  |
| C | -1.42972200 | 2.98266100  | -0.70899800 |
| H | -1.03598200 | 1.24034700  | -1.94291200 |
| C | -1.19910300 | 3.59431400  | 0.52624400  |
| H | -0.23210700 | 3.41026600  | 2.44644700  |
| H | -2.04053400 | 3.48307300  | -1.45660900 |
| H | -1.62490100 | 4.57084500  | 0.74247500  |
| H | 0.27191800  | -2.36951500 | -1.06625400 |
| C | -0.41383700 | -1.43204100 | 0.39526700  |
| O | 0.00680600  | -2.66807900 | -0.15366200 |
| H | -0.18196000 | -1.42110300 | 1.46967800  |
| C | -1.91170200 | -1.22996700 | 0.24392900  |
| C | -2.54758100 | -1.49277300 | -0.97749900 |
| C | -2.68755800 | -0.79917900 | 1.32505500  |
| C | -3.92451500 | -1.31966700 | -1.11028500 |
| H | -1.95113400 | -1.82274000 | -1.82079800 |
| C | -4.06706000 | -0.62650600 | 1.19598700  |
| H | -2.20768800 | -0.59676600 | 2.28046900  |
| C | -4.69047300 | -0.88712100 | -0.02441200 |
| H | -4.40347600 | -1.52657300 | -2.06445300 |
| H | -4.65311200 | -0.29495300 | 2.04976900  |
| H | -5.76514400 | -0.75925600 | -0.12856800 |

**Table S145. Cartesian coordinates of pyridyl-2-ylidene 18, TS-4**

|   |            |             |             |
|---|------------|-------------|-------------|
| C | 4.48250300 | -0.22856700 | -0.33082900 |
| C | 4.85681800 | -1.22465500 | 0.53868500  |
| C | 3.85056900 | -1.88076300 | 1.26460800  |
| C | 2.52970100 | -1.50152700 | 1.08477500  |
| C | 2.13857000 | -0.46246600 | 0.21164500  |
| H | 4.11131600 | -2.68232500 | 1.95185000  |
| H | 5.19638300 | 0.31861600  | -0.93665200 |
| H | 5.90402200 | -1.48804500 | 0.63826900  |
| H | 1.74947100 | -2.03274200 | 1.62113000  |
| N | 3.16982700 | 0.11935800  | -0.46983800 |
| C | 2.83938000 | 1.20352400  | -1.42219400 |
| H | 3.70871500 | 1.41564100  | -2.04760600 |
| H | 1.99559200 | 0.87542600  | -2.03132900 |
| H | 2.55636200 | 2.09895300  | -0.86510000 |
| C | 0.03807500 | -0.14271300 | -0.60876500 |
| O | 0.19400500 | -0.35912900 | -1.83240100 |

|   |             |             |             |
|---|-------------|-------------|-------------|
| C | -0.22488200 | 1.26109500  | -0.11515400 |
| C | -0.08807000 | 1.64049500  | 1.22740700  |
| C | -0.67862700 | 2.20718900  | -1.04208200 |
| C | -0.39176100 | 2.93909100  | 1.63148700  |
| H | 0.28572000  | 0.92333500  | 1.95267400  |
| C | -0.98418300 | 3.50828500  | -0.63927500 |
| H | -0.79016800 | 1.90079800  | -2.07735600 |
| C | -0.84154200 | 3.87844100  | 0.69848400  |
| H | -0.27403800 | 3.22172100  | 2.67465800  |
| H | -1.33825300 | 4.23123600  | -1.36999900 |
| H | -1.07834400 | 4.89105700  | 1.01489100  |
| H | 0.16484300  | -2.23565600 | -1.28012300 |
| C | -0.58363300 | -1.31866400 | 0.19533500  |
| O | -0.10238300 | -2.51789800 | -0.37821900 |
| H | -0.26857000 | -1.27592800 | 1.24314000  |
| C | -2.10712700 | -1.23416000 | 0.15183400  |
| C | -2.79718400 | -1.48343200 | -1.04196100 |
| C | -2.83944300 | -0.90674300 | 1.29707000  |
| C | -4.18787400 | -1.40555300 | -1.08556100 |
| H | -2.23542500 | -1.73630600 | -1.93573200 |
| C | -4.23315800 | -0.82728300 | 1.25707100  |
| H | -2.31546200 | -0.71548100 | 2.23125800  |
| C | -4.91157300 | -1.07692500 | 0.06419000  |
| H | -4.71001400 | -1.60214100 | -2.01877600 |
| H | -4.78672600 | -0.57616300 | 2.15847000  |
| H | -5.99654900 | -1.01930800 | 0.02954200  |

**Table S146. Cartesien coordinates of isoquinoline-6-ylidene 19**

|   |             |             |             |
|---|-------------|-------------|-------------|
| C | 3.09227700  | 0.41019600  | 0.12353900  |
| C | 1.96845500  | 1.26053000  | 0.03041400  |
| C | 0.63976400  | 0.81989900  | -0.03876700 |
| C | 0.37225200  | -0.60666800 | -0.01727100 |
| C | 1.47869000  | -1.50233300 | -0.03000800 |
| C | 2.75660200  | -0.98604800 | -0.04174300 |
| H | -0.36015400 | 2.75439900  | -0.07344600 |
| H | 2.10756100  | 2.34614900  | 0.08384900  |
| C | -0.50190600 | 1.67773000  | -0.05056900 |
| C | -0.94344200 | -1.04276900 | 0.00404300  |
| H | 1.28554000  | -2.57611400 | -0.03612500 |
| H | 3.57589500  | -1.70490800 | -0.13304900 |
| C | -1.76980800 | 1.17920800  | -0.03082900 |
| H | -1.19262900 | -2.09857500 | 0.02995800  |
| H | -2.66043400 | 1.79651100  | -0.03553200 |
| N | -1.99146100 | -0.18494800 | -0.00990700 |
| C | -3.36951100 | -0.67765400 | 0.05581600  |
| H | -3.37726000 | -1.75467000 | -0.11625100 |
| H | -3.80546800 | -0.46845700 | 1.03823800  |
| H | -3.97307200 | -0.19224300 | -0.71604400 |

**Table S147. Cartesien coordinates of isoquinoline-6-ylidene 19, TS-1**

|   |             |             |             |
|---|-------------|-------------|-------------|
| C | 0.03799100  | -0.75995900 | -0.79883300 |
| C | -0.74083500 | 0.38773800  | -0.53724100 |
| C | -2.10102800 | 0.36689600  | -0.19877900 |
| C | -2.78477700 | -0.90812100 | -0.10592600 |
| C | -2.04303200 | -2.09581100 | -0.35820200 |
| C | -0.70749500 | -1.99526000 | -0.67976400 |
| H | -2.41982300 | 2.50903800  | 0.00963400  |
| H | -0.27292900 | 1.37511600  | -0.59738400 |
| C | -2.88493600 | 1.52921500  | 0.06484000  |
| C | -4.13198200 | -0.92436100 | 0.22422300  |
| H | -2.55074000 | -3.05876100 | -0.28914900 |
| H | -0.17904300 | -2.93543900 | -0.85923100 |
| C | -4.20617300 | 1.43929300  | 0.38490200  |
| H | -4.68659200 | -1.85373300 | 0.30473800  |
| H | -4.83746200 | 2.29503400  | 0.59215700  |
| N | -4.82941800 | 0.20620000  | 0.46391400  |
| C | -6.25350700 | 0.15940100  | 0.81045500  |
| H | -6.58637200 | -0.87866600 | 0.83337300  |
| H | -6.41411200 | 0.60799900  | 1.79520600  |
| H | -6.83835500 | 0.70622400  | 0.06498600  |
| C | 2.51917200  | 1.15984500  | -1.10610400 |
| H | 2.03406500  | 0.54819000  | -1.88371800 |
| O | 2.20555900  | 2.32780900  | -0.92291900 |
| C | 3.56197200  | 0.45780700  | -0.31309900 |
| C | 3.70813400  | -0.93067700 | -0.43112800 |
| C | 4.41407200  | 1.18067900  | 0.53307200  |
| C | 4.70554000  | -1.59002100 | 0.28543500  |
| H | 3.00016200  | -1.47496100 | -1.05014800 |
| C | 5.41318300  | 0.52141400  | 1.24474200  |
| H | 4.27726600  | 2.25543400  | 0.60976300  |
| C | 5.56052800  | -0.86415200 | 1.11999500  |
| H | 4.81479200  | -2.66833400 | 0.20122400  |
| H | 6.07961900  | 1.08179600  | 1.89579300  |
| H | 6.34000800  | -1.37834800 | 1.67718500  |

**Table S148. Cartesien coordinates of isoquinoline-6-ylidene 19, IM-1**

|   |             |             |             |
|---|-------------|-------------|-------------|
| C | 0.43491900  | 0.36554500  | -0.72088900 |
| C | -0.60114000 | 1.20510600  | -0.31378000 |
| C | -1.88446500 | 0.70641500  | -0.08649500 |
| C | -2.14557400 | -0.70409800 | -0.28778800 |
| C | -1.08075600 | -1.54714900 | -0.71710600 |
| C | 0.17022300  | -1.01409500 | -0.92998400 |
| H | -2.84008700 | 2.57182600  | 0.50726800  |
| H | -0.33222100 | 2.25384800  | -0.19759900 |
| C | -2.98353100 | 1.50826500  | 0.34816400  |
| C | -3.42582300 | -1.18998700 | -0.04167400 |

|   |             |             |             |
|---|-------------|-------------|-------------|
| H | -1.26926300 | -2.60848800 | -0.86108000 |
| H | 0.98157000  | -1.66282700 | -1.24810300 |
| C | -4.21286900 | 0.96189500  | 0.56609700  |
| H | -3.67174100 | -2.23892100 | -0.16460100 |
| H | -5.07075700 | 1.53453000  | 0.89687100  |
| N | -4.43475100 | -0.38490900 | 0.36985200  |
| C | -5.75832600 | -0.93952600 | 0.67543700  |
| H | -5.84415400 | -1.93376600 | 0.23547800  |
| H | -5.90212200 | -1.01033400 | 1.75842200  |
| H | -6.53209900 | -0.29660100 | 0.24904400  |
| C | 1.79038000  | 1.06707400  | -1.00303900 |
| H | 1.92086200  | 0.77641500  | -2.09715800 |
| O | 1.77973500  | 2.36014700  | -0.78192400 |
| C | 2.91710600  | 0.28385800  | -0.26435200 |
| C | 3.57234100  | -0.82558300 | -0.80785100 |
| C | 3.31471300  | 0.75034200  | 0.99383300  |
| C | 4.58378700  | -1.47936700 | -0.09657900 |
| C | 3.31268900  | -1.16811400 | -1.80895600 |
| C | 4.31678100  | 0.09811500  | 1.70961500  |
| H | 2.83620900  | 1.65049000  | 1.36820800  |
| C | 4.95354600  | -1.02426200 | 1.16918600  |
| H | 5.09139900  | -2.33418800 | -0.53873100 |
| H | 4.61377700  | 0.47062200  | 2.68792400  |
| H | 5.74343900  | -1.52659500 | 1.72266200  |

**Table S149. Cartesian coordinates of isoquinoline-6-ylidene 19, TS-2**

|   |             |             |             |
|---|-------------|-------------|-------------|
| C | -0.41765000 | -0.41455800 | 0.20952000  |
| C | -1.36803300 | 0.39190000  | 0.86176400  |
| C | -2.71549100 | 0.33957500  | 0.52835400  |
| C | -3.17035100 | -0.56716800 | -0.50525600 |
| C | -2.20305200 | -1.39177100 | -1.15545400 |
| C | -0.88184800 | -1.31050000 | -0.80761400 |
| H | -3.43990400 | 1.84596600  | 1.93447100  |
| H | -1.01419200 | 1.05812500  | 1.64010700  |
| C | -3.72196200 | 1.14421200  | 1.15652500  |
| C | -4.51719900 | -0.61000800 | -0.82546200 |
| H | -2.53031600 | -2.08917200 | -1.92274300 |
| H | -0.16033900 | -1.95043300 | -1.30407300 |
| C | -5.02733700 | 1.05160900  | 0.78937300  |
| H | -4.90139400 | -1.27511900 | -1.59104700 |
| H | -5.81497600 | 1.64467200  | 1.23814900  |
| N | -5.43239300 | 0.17815200  | -0.20417200 |
| C | -6.85764600 | 0.07797300  | -0.52783500 |
| H | -6.97796100 | -0.47132600 | -1.46248900 |
| H | -7.39796500 | -0.44549400 | 0.26822600  |
| H | -7.27909600 | 1.07912600  | -0.65115100 |
| C | 1.01474100  | -0.23132900 | 0.52307100  |
| H | 1.38087200  | 0.66613400  | -0.16159800 |
| O | 1.20267500  | 0.35199500  | 1.79772600  |
| C | 1.91956800  | -1.42823700 | 0.28752500  |
| C | 2.39299300  | -1.74625700 | -0.99287900 |
| C | 2.31791300  | -2.22777500 | 1.36752200  |
| C | 3.21704900  | -2.85631600 | -1.19712300 |
| H | 2.13100100  | -1.10795100 | -1.83431800 |
| C | 3.14237200  | -3.33384300 | 1.16615400  |
| C | 1.98655800  | -1.95479300 | 2.36417000  |
| C | 3.59054300  | -3.65708200 | -0.11768400 |
| H | 3.57890200  | -3.08318400 | -2.19704000 |
| H | 3.44131800  | -3.94452500 | 2.01493500  |
| H | 4.23705700  | -4.51729200 | -0.27184900 |
| H | 1.62861900  | 1.22040300  | 1.52976300  |
| O | 1.85751400  | 2.17152500  | 0.11335500  |
| C | 3.07244000  | 2.62947000  | -0.38429800 |
| C | 3.24457600  | 4.09366200  | 0.09401800  |
| H | 4.18033800  | 4.54009000  | -0.26919400 |
| H | 2.40465900  | 4.70072600  | -0.26215200 |
| H | 3.24526100  | 4.12808500  | 1.18958100  |
| C | 4.26053700  | 1.78617200  | 0.13290300  |
| H | 4.15858500  | 0.74412600  | -0.19255600 |
| H | 5.22789800  | 2.16235700  | -0.22700900 |
| H | 4.27723400  | 1.79413400  | 1.22947900  |
| C | 3.05337800  | 2.60266000  | -1.93047700 |
| H | 2.19156300  | 3.17146300  | -2.29824500 |
| H | 3.96606000  | 3.02505600  | -2.37217900 |
| H | 2.95220700  | 1.56924700  | -2.28655900 |

**Table S150. Cartesian coordinates of isoquinoline-6-ylidene 19, IM-2**

|   |             |             |             |
|---|-------------|-------------|-------------|
| C | 0.39825400  | 0.39704100  | -0.00082000 |
| C | -0.77221900 | 1.23558100  | -0.16025600 |
| C | -2.04340600 | 0.73165400  | -0.10890100 |
| C | -2.27570500 | -0.69013800 | 0.13916600  |
| C | -1.11215200 | -1.51940100 | 0.34899500  |
| C | 0.14144000  | -1.00517000 | 0.28821600  |
| H | -3.15475100 | 2.58819100  | -0.49352000 |
| H | -0.62094500 | 2.29339100  | -0.34495900 |
| C | -3.24282700 | 1.52400700  | -0.29813100 |
| C | -3.55061500 | -1.18355500 | 0.17931200  |
| H | -1.25833800 | -2.57170900 | 0.58353800  |
| H | 0.98413600  | -1.65534800 | 0.49656800  |
| C | -4.47565400 | 0.96654800  | -0.24778900 |
| H | -3.75546900 | -2.23300200 | 0.36420800  |
| H | -5.38396500 | 1.54274400  | -0.38638700 |
| N | -4.66308600 | -0.38785800 | -0.02674000 |
| C | -5.99589300 | -0.92480500 | 0.19657200  |
| H | -6.04301500 | -1.95649900 | -0.16448700 |
| H | -6.27343700 | -0.91255500 | 1.26013400  |
| H | -6.72612900 | -0.33353400 | -0.36211400 |
| C | 1.67131700  | 0.92797300  | -0.04782500 |
| O | 1.75842400  | 2.31531300  | -0.05360600 |
| C | 2.95280700  | 0.21898800  | -0.02720900 |

|   |            |             |             |
|---|------------|-------------|-------------|
| C | 3.16242700 | -1.00320300 | -0.70395100 |
| C | 4.06441100 | 0.80438500  | 0.62136800  |
| C | 4.40839700 | -1.62369100 | -0.69604100 |
| H | 2.34775500 | -1.44344800 | -1.26971000 |
| C | 5.31072800 | 0.18322500  | 0.61902900  |
| H | 3.92862000 | 1.73812600  | 1.16018800  |
| C | 5.49164400 | -1.03780200 | -0.03439200 |
| H | 4.54108000 | -2.56130700 | -1.23032800 |
| H | 6.14320500 | 0.65107500  | 1.13901400  |
| H | 6.46435300 | -1.52189600 | -0.03669300 |
| H | 2.58338800 | 2.55845100  | -0.50349500 |

**Table S151. Cartesien coordinates of isoquinoline-6-ylidene 19, TS-3**

|   |             |             |             |
|---|-------------|-------------|-------------|
| C | -0.74581200 | 0.33153300  | -0.26597600 |
| C | -1.79073100 | -0.18633300 | -1.04759600 |
| C | -3.10541000 | -0.19620600 | -0.59274600 |
| C | -3.42018600 | 0.35366000  | 0.70859500  |
| C | -2.35970400 | 0.89851600  | 1.48968500  |
| C | -1.07352800 | 0.87766500  | 1.01481300  |
| H | -4.02381300 | -1.13366800 | -2.33420700 |
| H | -1.52613100 | -0.56002000 | -2.03029800 |
| C | -4.20312600 | -0.71049500 | -1.35142000 |
| C | -4.73776000 | 0.34838100  | 1.14264400  |
| C | -2.58527400 | 1.34047400  | 2.45726900  |
| H | -0.28562900 | 1.31223000  | 1.61815100  |
| C | -5.47204800 | -0.68470600 | -0.86057500 |
| H | -5.02193500 | 0.75269600  | 2.10810400  |
| H | -6.32931900 | -1.06787000 | -1.40055600 |
| N | -5.74189000 | -0.15631500 | 0.38794900  |
| C | -7.12678600 | -0.15702400 | 0.87121800  |
| H | -7.16639700 | 0.31535300  | 1.85303700  |
| H | -7.76424700 | 0.40229600  | 0.18031200  |
| H | -7.49527700 | -1.18390100 | 0.95332100  |
| O | 0.64636200  | 0.17482400  | -0.82284600 |
| C | 0.68230400  | -0.16467000 | -2.09643100 |
| C | 1.63300200  | 1.26932400  | -0.41488900 |
| C | 2.07757400  | 1.52616400  | 0.89091300  |
| C | 2.11363000  | 2.09024900  | -1.44556100 |
| C | 2.94949400  | 2.58338500  | 1.16096700  |
| H | 1.78386000  | 0.87426900  | 1.70768500  |
| C | 2.98410000  | 3.14651200  | -1.17972100 |
| H | 1.79084200  | 1.86448900  | -2.45591200 |
| C | 3.40219400  | 3.40370700  | 0.12757000  |
| H | 3.28777400  | 2.75262200  | 2.18066200  |
| H | 3.34016000  | 3.76964200  | -1.99719600 |
| H | 4.08389200  | 4.22448600  | 0.33704900  |
| H | 0.57355600  | -1.69065600 | -1.76769200 |
| C | 1.01008100  | -1.47867700 | 0.02856900  |
| H | 0.42801000  | -1.56300200 | 0.95358500  |
| O | 0.53263200  | -2.31292200 | -0.94998900 |
| C | 2.47742600  | -1.59046800 | 0.29282100  |
| C | 2.96649400  | -1.68519000 | 1.60317800  |
| C | 3.39327800  | -1.63430500 | -0.77174100 |
| C | 4.33293800  | -1.82243200 | 1.85164500  |
| H | 2.26475500  | -1.67101500 | 2.43586000  |
| C | 4.75688300  | -1.76467400 | -0.52461600 |
| C | 3.01887700  | -1.54466600 | -1.78615000 |
| C | 5.23398800  | -1.86187600 | 0.78686200  |
| H | 4.69190000  | -1.90652400 | 2.87485000  |
| H | 5.45477300  | -1.79150000 | -1.35812400 |
| H | 6.29925700  | -1.96999500 | 0.97520000  |

**Table S152. Cartesien coordinates of isoquinoline-6-ylidene 19, IM-3**

|   |             |             |             |
|---|-------------|-------------|-------------|
| C | -0.74117000 | 0.00750800  | -0.04207100 |
| C | -1.74081000 | -0.31704800 | -0.95363300 |
| C | -3.08908700 | -0.29944500 | -0.58659600 |
| C | -3.45277900 | 0.06198000  | 0.76540900  |
| C | -2.42529400 | 0.40271600  | 1.68764200  |
| C | -1.11161100 | 0.37393800  | 1.28431900  |
| H | -3.93159200 | -0.90338700 | -2.49986400 |
| H | -1.39287600 | -0.58285200 | -1.94993800 |
| C | -4.15443400 | -0.62548700 | -1.47504300 |
| C | -4.79933200 | 0.06965000  | 1.11749800  |
| H | -2.69238100 | 0.68619000  | 2.70287800  |
| H | -0.33645100 | 0.64853100  | 1.99167300  |
| C | -5.45213700 | -0.59841300 | -1.05878600 |
| H | -5.12475600 | 0.33561600  | 2.11738300  |
| H | -6.29272000 | -0.84085800 | -1.69697500 |
| N | -5.76951100 | -0.25058000 | 0.23986400  |
| C | -7.18411100 | -0.24568700 | 0.63935100  |
| H | -7.26549300 | 0.07605600  | 1.67765300  |
| H | -7.74493400 | 0.44493100  | 0.00399600  |
| H | -7.60043700 | -1.25195700 | 0.54067000  |
| O | 0.72290100  | -0.11852000 | -0.56611300 |
| C | 0.72710700  | -0.48051900 | -1.85735500 |
| C | 1.41078200  | 1.24315200  | -0.29323400 |
| C | 1.91117400  | 1.65310600  | 0.95070100  |
| C | 1.51175400  | 2.12780400  | -1.37423800 |
| C | 2.48387200  | 2.91719600  | 1.11204800  |
| H | 1.89741500  | 0.97316800  | 1.79846100  |
| C | 2.07887000  | 3.39176600  | -1.21613900 |
| H | 1.15320000  | 1.77548000  | -2.33582600 |
| C | 2.56354100  | 3.79536200  | 0.03055600  |
| C | 2.88048600  | 3.20874200  | 2.08208100  |
| H | 2.15101600  | 4.06256400  | -2.06973700 |
| H | 3.01237000  | 4.77804400  | 0.15489500  |
| H | 0.70876300  | -2.12714100 | -1.27164300 |
| C | 1.35770600  | -1.35544900 | 0.28600900  |
| H | 1.01409500  | -1.35132700 | 1.33026100  |

|   |            |             |             |
|---|------------|-------------|-------------|
| O | 0.82408700 | -2.49717000 | -0.34779500 |
| C | 2.87686100 | -1.37154600 | 0.28204500  |
| C | 3.58800700 | -1.51344100 | 1.47862700  |
| C | 3.59484400 | -1.30252300 | -0.92260800 |
| C | 4.98340900 | -1.58522400 | 1.48441600  |
| H | 3.04208200 | -1.58154100 | 2.41876000  |
| C | 4.98638200 | -1.36918900 | -0.91881400 |
| H | 3.03751500 | -1.17086900 | -1.84482000 |
| C | 5.68748900 | -1.51327100 | 0.28286600  |
| H | 5.51684200 | -1.70146200 | 2.42527600  |
| H | 5.53032800 | -1.30715900 | -1.85876900 |
| H | 6.77359100 | -1.56881200 | 0.28045500  |

**Table S153. Cartesian coordinates of isoquinoline-6-ylidene 19, TS-4**

|   |             |             |             |
|---|-------------|-------------|-------------|
| C | -1.24982700 | 0.18594300  | 0.94829300  |
| C | -2.01240800 | 0.16422400  | -0.23861000 |
| C | -3.40361200 | -0.00045100 | -0.28900900 |
| C | -4.14026800 | -0.15586000 | 0.94945600  |
| C | -3.41855900 | -0.13396500 | 2.17495900  |
| C | -2.05130100 | 0.02821900  | 2.14363600  |
| H | -3.66528500 | 0.07899500  | -2.44775900 |
| H | -1.50632600 | 0.27239800  | -1.20204000 |
| C | -4.16910100 | -0.03241400 | -1.49216800 |
| C | -5.51634200 | -0.32409200 | 0.89523800  |
| H | -3.96543700 | -0.25053500 | 3.11121200  |
| H | -1.54139300 | 0.03375400  | 3.11042400  |
| C | -5.52083300 | -0.20158700 | -1.47150300 |
| H | -6.11021100 | -0.44639900 | 1.79526300  |
| H | -6.13942500 | -0.23312400 | -2.36031400 |
| N | -6.19415700 | -0.34749200 | -0.27153700 |
| C | -7.64816200 | -0.53750600 | -0.30001300 |
| H | -8.02413500 | -0.60711500 | 0.72111300  |
| H | -8.12563900 | 0.31040100  | -0.79951900 |
| H | -7.89542000 | -1.45863900 | -0.83602900 |
| C | 1.44508100  | 0.01487200  | -0.86236900 |
| O | 0.95861500  | -0.20378600 | -1.96823300 |
| C | 1.93117500  | 1.37411800  | -0.48979800 |
| C | 1.75522300  | 1.90279100  | 0.79710600  |
| C | 2.57204000  | 2.14107200  | -1.47325000 |
| C | 2.23566800  | 3.17720200  | 1.09520400  |
| H | 1.16427700  | 1.34085700  | 1.51352500  |
| C | 3.06441400  | 3.40798400  | -1.16585300 |
| H | 2.68693800  | 1.72725100  | -2.47047500 |
| C | 2.89985100  | 3.92656000  | 0.12066100  |
| H | 2.08181500  | 3.59197000  | 2.08814000  |
| H | 3.57317600  | 3.99155600  | -1.92875100 |
| H | 3.27835200  | 4.91728100  | 0.35998800  |
| H | 0.64506600  | -1.98070400 | -1.31950900 |
| C | 1.67500100  | -1.19412300 | 0.07532900  |
| H | 1.24751400  | -0.94019900 | 1.05077700  |
| O | 0.99985600  | -2.30607400 | -0.46674600 |
| C | 3.17449900  | -1.46161000 | 0.20371700  |
| C | 3.91601500  | -0.93771500 | 1.26814200  |
| C | 3.83042300  | -2.23448300 | -0.76178500 |
| C | 5.28846800  | -1.17379400 | 1.36349600  |
| H | 3.41681400  | -0.34256700 | 2.02875600  |
| C | 5.20140000  | -2.47181400 | -0.66887200 |
| H | 3.24827900  | -2.66509300 | -1.57033600 |
| C | 5.93637100  | -1.94031900 | 0.39347700  |
| H | 5.84959500  | -0.76380300 | 2.19963900  |
| H | 5.69689800  | -3.07654800 | -1.42466600 |
| H | 7.00456900  | -2.12793600 | 0.46824900  |
